# Supplementary material
Source: PubMed Central journal article supplement (PMC5076535)
Supplement: 10.1074_M116.738542_jbc.M116.738542-1.pdf [file 10.1074_M116.738542_jbc.M116.738542-1.pdf]

## Architecture of the Human Mitochondrial Iron-Sulfur Cluster Assembly Machinery

**Oleksandr Gakh<sup>1#</sup>, Wasantha Ranatunga<sup>1#</sup>, Douglas Y. Smith IV<sup>1</sup>, Eva-Christina Ahlgren<sup>2</sup>, Salam Al-Karadaghi<sup>2</sup>, James R. Thompson<sup>3</sup>, and Grazia Isaya<sup>1</sup>**

*<sup>1</sup>Departments of Pediatric and Adolescent Medicine and Biochemistry and Molecular Biology and Mayo Clinic Children's Research Center, Mayo Clinic, Rochester, MN 55905, USA; <sup>2</sup>Center for Molecular Protein Science, Institute for Chemistry and Chemical Engineering, Lund University, P. O. Box 124, SE-221 00 Lund, Sweden; <sup>3</sup>Department of Physiology and Biomedical Engineering, Mayo Clinic, Rochester, Minnesota 55905, USA*

<sup>#</sup>These authors contributed equally to this work.

Running title: Architecture of the Human Fe-S Cluster Assembly Machinery

To whom correspondence should be addressed: Grazia Isaya, Mayo Clinic, 200 First St. SW, Stable 7-52, Rochester, MN 55905. Tel.: 507-266-0110; Fax: 507-266-9315; E-mail: [isaya@mayo.edu](mailto:isaya@mayo.edu).

**Keywords:** Friedreich ataxia, frataxin, iron-sulfur protein, mitochondria, protein complex.

---

### TABLE OF CONTENT:

- 1. Supplemental Figure S1 ..... Page S-2**
- 2. Supplemental Table S1 ..... Page S-3**
- 3. Supplemental Table S2 ..... Page S-4**
- 4. Supplemental Table S3 ..... Page S-38**
- 5. Supplemental Table S4 ..... Page S-43**

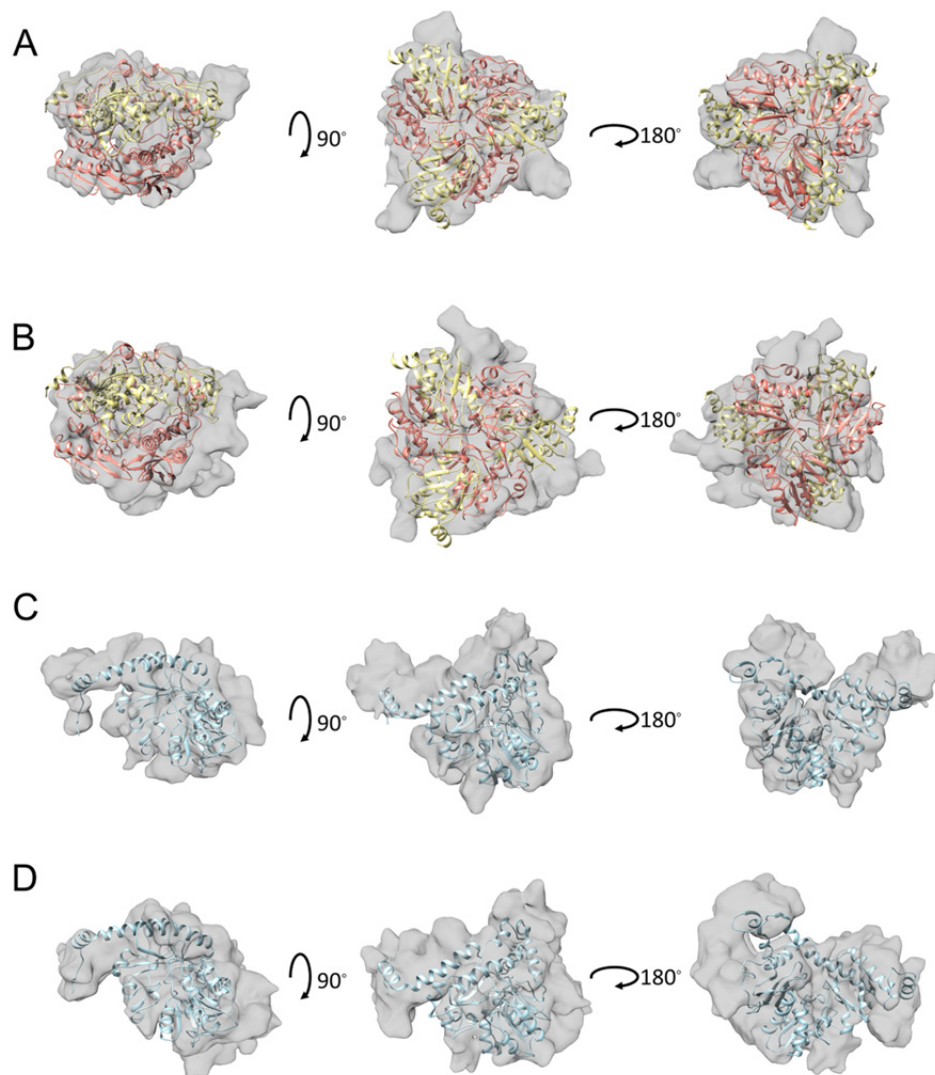

**Supplemental Figure S1.** (A-B), the EM density maps of the refined 3D models without symmetry applied and with 432 symmetry applied were segmented using Chimera. Segmentation revealed volumes with similar shapes around the 3-fold symmetry axes. Shown is the simulated structure of the [FXN<sup>42-210</sup>]<sub>3</sub>•[ISCU]<sub>3</sub> sub-complex docked into one of these volumes from the 3D model without symmetry applied (A) compared to the model with 432 symmetry applied (B). Cross-correlation functions were 0.54 and 0.62 for the 3D model without and with 432 symmetry applied, respectively. (C-D), segmentation also revealed volumes with similar shapes around the 4-fold symmetry axes of the two 3D models. Shown is the simulated structure of NFS1 monomer docked into one of these volumes from the 3D model without symmetry applied (C) compared to the model with 432 symmetry applied (D). Cross-correlation functions were 0.56 and 0.57 for the 3D model without and with 432 symmetry applied, respectively.

**Supplemental Table S1.** Mass spectrometry analysis of protein bands

| Protein | Band*** |       | Band** |       | Band* |       | ISCU |       |
|---------|---------|-------|--------|-------|-------|-------|------|-------|
|         | TSC     | % TSC | TSC    | % TSC | TSC   | % TSC | TSC  | % TSC |
| FXN     | 164     | 61%   | 41     | 24%   | 6     | 3%    | 11   | 5%    |
| NFS1    | 97      | 36%   | 108    | 62%   | 22    | 13%   | 27   | 13%   |
| ISCU    | 6       | 2%    | 23     | 13%   | 140   | 80%   | 157  | 77%   |
| ISD11   | 0       | 0%    | 2      | 1%    | 8     | 5%    | 8    | 4%    |

TSC, Total Spectrum Count, total number of spectra associated with each protein including replicates.

The ISCU band and the three bands denoted by asterisks in Fig. 1G were analyzed by tandem mass spectrometry as described in Experimental Procedures. The most abundant protein in band\* is ISCU (80% of the total spectra identified), and the overall protein composition of this band is very similar to that of the actual ISCU band. These data suggest that band\* is a faster migrating form of ISCU, which may result from *intra*-molecular disulfide bonds that make ISCU more compact and increase its mobility. The most abundant protein in band\*\* is NFS1 (62% of the total spectra identified), suggesting a faster migrating form of NFS1 due to *intra*-molecular disulfide bonds. The presence of both FXN and ISCU peptides in this band and its apparent molecular mass of ~44 kDa may also be consistent with the presence of FXN<sup>42-210</sup>-ISCU adducts. However, given that band\*\* is barely detectable (Fig. 1G), only negligible amounts of these species may be present. The most abundant protein in band\*\*\* is FXN<sup>42-210</sup> (61% of the total spectra identified), although significant amounts of NFS1 are also present (36% of the total spectra identified). It is unlikely band\*\*\* represents a FXN<sup>42-210</sup>-NFS1 adduct given its apparent molecular mass of ~46 kDa. On the other hand, the presence of NFS1 in band\*\*\* could have resulted from diffusion from the NFS1 band immediately underneath. In addition, we detected the same ~46 kDa band by non-reducing SDS-PAGE analysis of individually expressed and purified oligomeric FXN<sup>42-210</sup> (not shown). Therefore, band\*\*\* most likely represents a slower migrating form of FXN<sup>42-210</sup>, probably dimer given the apparent molecular mass of ~46 kDa. This species may result from an *inter*-molecular disulfide bond between FXN<sup>42-210</sup> subunits. It is unlikely that *inter*-molecular disulfide bonds are required to stabilize oligomeric FXN<sup>42-210</sup> as the protein contains only one Cys residue, Cys-50, which is outside of the N-terminal region necessary and sufficient for oligomerization (residues 56-78) (1). In addition, in the structural model of the complex, the position of the N-terminal region, which was modeled on the basis of the cross-linking data, is not compatible with the formation of disulfide bonds between adjacent FXN<sup>42-210</sup> subunits. Thus, this region of the protein, which is predicted to be highly flexible, may sample alternative configurations some of which may favor disulfide bond formation between adjacent FXN<sup>42-210</sup> subunits. Accordingly, the ~46 kDa band was also detected by non-reducing SDS-PAGE analysis of purified monomeric FXN<sup>42-210</sup> (not shown).

1. O'Neill, H. A., Gakh, O., and Isaya, G. (2005) Supramolecular assemblies of human frataxin are formed via subunit-subunit interactions mediated by a non-conserved amino-terminal region. *J. Mol. Biol.* **345**, 433-439

Supplemental Table S2. Analysis of cross-linked peptides and distances between pairs of cross-linked amino acids in complex structure

Supplemental Table S2a, p.1

| Cross-linked peptides                                                                     |                                                                                           | Figure | Distances (Å) measured in structure |                                                           |                                                            | # of peptides | False Discovery Rate (FDR) of cross-linked peptides |      |      |       |       |      |
|-------------------------------------------------------------------------------------------|-------------------------------------------------------------------------------------------|--------|-------------------------------------|-----------------------------------------------------------|------------------------------------------------------------|---------------|-----------------------------------------------------|------|------|-------|-------|------|
| FXN <sup>42-210</sup>                                                                     | FXN <sup>42-210</sup>                                                                     |        | FXN <sup>42-210</sup> intra-monomer | FXN <sup>42-210</sup> -FXN <sup>42-210</sup> intra-trimer | FXN <sup>42-210</sup> -FXN <sup>42-210</sup> inter-trimers |               | ≤5 %                                                | ≤10% | ≤15% | ≤25 % | ≤35 % | ≤60% |
| <b>Single digestion GluC</b>                                                              |                                                                                           |        |                                     |                                                           |                                                            |               | ≤5 %                                                | ≤10% | ≤15% | ≤25 % | ≤35 % | ≤60% |
| T <sub>93</sub> T <sub>94</sub> Y <sub>95</sub> E                                         | FFEDLADK <sub>116</sub> PYTTFE                                                            |        |                                     |                                                           |                                                            | 1             |                                                     |      | 1    |       |       |      |
| T <sub>93</sub>                                                                           | K <sub>116</sub>                                                                          |        | 35.8 ± 1.5                          | 31.2 ± 1.1                                                | 28.1 ± 0.8                                                 |               |                                                     |      |      |       |       |      |
| T <sub>94</sub>                                                                           | K <sub>116</sub>                                                                          |        | 33.3 ± 0.9                          | 32.9 ± 1.1                                                | 26.3 ± 1.1                                                 |               |                                                     |      |      |       |       |      |
| Y <sub>95</sub>                                                                           | K <sub>116</sub>                                                                          | 6B,C,D | 31.9 ± 1.4                          | 34.2 ± 1.6                                                | 26.3 ± 1.2                                                 |               |                                                     |      |      |       |       |      |
| <b>ET<sub>102</sub>LDS<sub>105</sub>LAE</b>                                               |                                                                                           |        |                                     |                                                           |                                                            |               | ≤5 %                                                | ≤10% | ≤15% | ≤25 % | ≤35 % | ≤60% |
| ET <sub>102</sub> LDS <sub>105</sub> LAE                                                  | FFEDLADK <sub>116</sub> PY <sub>118</sub> T <sub>119</sub> FE                             |        |                                     |                                                           |                                                            | 1             |                                                     |      | 1    |       | 2     |      |
| T <sub>102</sub>                                                                          | K <sub>116</sub>                                                                          | 6B,D   | 21.9 ± 0.5                          | 45.2 ± 1.6                                                | 23.4 ± 1.6                                                 |               |                                                     |      |      |       |       |      |
| S <sub>105</sub>                                                                          | K <sub>116</sub>                                                                          | 6B,D   | 17.6 ± 0.5                          | 48.6 ± 1.7                                                | 18.8 ± 1.6                                                 |               |                                                     |      |      |       |       |      |
| <b>Double digestion GluC&amp;AspN</b>                                                     |                                                                                           |        |                                     |                                                           |                                                            |               | ≤5%                                                 | ≤10% | ≤15% | ≤25%  | ≤35 % | ≤60% |
| LTK <sub>192</sub> ALK <sub>195</sub> TK <sub>197</sub> L                                 | DLS <sub>201</sub> S <sub>202</sub> LAY <sub>205</sub> S <sub>206</sub> GK <sub>208</sub> |        |                                     |                                                           |                                                            | 6             | 4                                                   |      | 2    |       |       |      |
| K <sub>192</sub>                                                                          | S <sub>201</sub>                                                                          |        | 14.4±07                             | 39.9±0.9                                                  | 31.5±1.3                                                   |               |                                                     |      |      |       |       |      |
| K <sub>192</sub>                                                                          | S <sub>202</sub>                                                                          |        | 17.5±0.7                            | 37.7±1.1                                                  | 29.8±2.0                                                   |               |                                                     |      |      |       |       |      |
| K <sub>192</sub>                                                                          | Y <sub>205</sub>                                                                          | 6B     | 23.0±1.5                            | 31.0±1.1                                                  | 27.1±2.3                                                   |               |                                                     |      |      |       |       |      |
| K <sub>192</sub>                                                                          | S <sub>206</sub>                                                                          |        | 20.3±1.6                            | 34.0±1.3                                                  | 30.2±2.0                                                   |               |                                                     |      |      |       |       |      |
| K <sub>192</sub>                                                                          | K <sub>208</sub>                                                                          |        | 19.0±1.0                            | 37.8±1.4                                                  | 31.7±1.2                                                   |               |                                                     |      |      |       |       |      |
| K <sub>195</sub>                                                                          | S <sub>201</sub>                                                                          | 6B     | 16.9±0.7                            | 44.8±1.1                                                  | 31.9±2.3                                                   |               |                                                     |      |      |       |       |      |
| K <sub>195</sub>                                                                          | S <sub>202</sub>                                                                          |        | 19.4±0.9                            | 42.6±1.3                                                  | 28.4±2.5                                                   |               |                                                     |      |      |       |       |      |
| K <sub>195</sub>                                                                          | Y <sub>205</sub>                                                                          | 6D     | 26.0±1.3                            | 36.0±1.3                                                  | 26.5±2.5                                                   |               |                                                     |      |      |       |       |      |
| K <sub>195</sub>                                                                          | S <sub>206</sub>                                                                          |        | 23.3±1.5                            | 38.9±1.4                                                  | 29.4±2.2                                                   |               |                                                     |      |      |       |       |      |
| K <sub>195</sub>                                                                          | K <sub>208</sub>                                                                          |        | 21.0±1.1                            | 42.5±1.4                                                  | 29.8±1.3                                                   |               |                                                     |      |      |       |       |      |
| K <sub>197</sub>                                                                          | S <sub>201</sub>                                                                          |        | 12.1±0.9                            | 44.8±1.2                                                  | 35.8±2.3                                                   |               |                                                     |      |      |       |       |      |
| K <sub>197</sub>                                                                          | S <sub>202</sub>                                                                          |        | 14.2±1.2                            | 43.0±1.5                                                  | 32.1±2.0                                                   |               |                                                     |      |      |       |       |      |
| K <sub>197</sub>                                                                          | Y <sub>205</sub>                                                                          |        | 21.1±1.3                            | 35.9±1.4                                                  | 31.2±2.0                                                   |               |                                                     |      |      |       |       |      |
| K <sub>197</sub>                                                                          | S <sub>206</sub>                                                                          |        | 18.4±1.8                            | 38.5±1.5                                                  | 34.0±1.7                                                   |               |                                                     |      |      |       |       |      |
| K <sub>197</sub>                                                                          | K <sub>208</sub>                                                                          | 6B     | 15.1±1.5                            | 42.2±1.8                                                  | 34.4±1.0                                                   |               |                                                     |      |      |       |       |      |
| T <sub>191</sub>                                                                          | K <sub>208</sub>                                                                          |        | 16.2±1.1                            | 39.1±1.5                                                  | 32.2±0.9                                                   |               |                                                     |      |      |       |       |      |
| T <sub>196</sub>                                                                          | K <sub>208</sub>                                                                          |        | 18.8±1.4                            | 43.8±1.5                                                  | 31.6±1.2                                                   |               |                                                     |      |      |       |       |      |
| <b>DLS<sub>201</sub>S<sub>202</sub>LAY<sub>205</sub>S<sub>206</sub>GK<sub>208</sub></b>   |                                                                                           |        |                                     |                                                           |                                                            |               | ≤5 %                                                | ≤10% | ≤15% | ≤25 % | ≤35 % | ≤60% |
| DLS <sub>201</sub> S <sub>202</sub> LAY <sub>205</sub> S <sub>206</sub> GK <sub>208</sub> | DWT <sub>169</sub> GK <sub>171</sub> NWVY <sub>175</sub> S <sub>176</sub> H               |        |                                     |                                                           |                                                            | 3             | 3                                                   |      |      |       |       |      |
| K <sub>208</sub>                                                                          | T <sub>169</sub>                                                                          |        | 19.4±2.3                            | 25.0±2.1                                                  | 48.0±1.4                                                   |               |                                                     |      |      |       |       |      |
| K <sub>208</sub>                                                                          | K <sub>171</sub>                                                                          | 6B     | 15.2±2.0                            | 25.2±2.1                                                  | 44.8±1.3                                                   |               |                                                     |      |      |       |       |      |
| K <sub>208</sub>                                                                          | Y <sub>175</sub>                                                                          |        | 17.9±1.4                            | 24.6±1.7                                                  | 43.5±0.7                                                   |               |                                                     |      |      |       |       |      |
| K <sub>208</sub>                                                                          | S <sub>176</sub>                                                                          | 6C     | 21.0±1.5                            | 21.5±1.8                                                  | 44.0±1.2                                                   |               |                                                     |      |      |       |       |      |
| S <sub>201</sub>                                                                          | K <sub>171</sub>                                                                          |        | 15.5±1.8                            | 24.0±1.8                                                  | 38.1±1.4                                                   |               |                                                     |      |      |       |       |      |
| S <sub>202</sub>                                                                          | K <sub>171</sub>                                                                          |        | 15.3±1.8                            | 26.3±2.1                                                  | 39.8±1.2                                                   |               |                                                     |      |      |       |       |      |
| Y <sub>205</sub>                                                                          | K <sub>171</sub>                                                                          | 6C     | 8.1±1.6                             | 22.5±1.6                                                  | 45.0±1.5                                                   |               |                                                     |      |      |       |       |      |
| S <sub>206</sub>                                                                          | K <sub>171</sub>                                                                          | 6C     | 9.4±1.9                             | 21.2±2.0                                                  | 43.7±1.0                                                   |               |                                                     |      |      |       |       |      |

Supplemental Table S2a, p.2

| Cross-linked peptides                                    |                                                                                                                     | Figure | Distances (Å) measured in structure |                                                           |                                                            | # of peptides | False Discovery Rate (FDR) of cross-linked peptides |      |      |       |       |      |
|----------------------------------------------------------|---------------------------------------------------------------------------------------------------------------------|--------|-------------------------------------|-----------------------------------------------------------|------------------------------------------------------------|---------------|-----------------------------------------------------|------|------|-------|-------|------|
| FXN <sup>42-210</sup>                                    | FXN <sup>42-210</sup>                                                                                               |        | FXN <sup>42-210</sup> intra-monomer | FXN <sup>42-210</sup> -FXN <sup>42-210</sup> intra-trimer | FXN <sup>42-210</sup> -FXN <sup>42-210</sup> inter-trimers |               | ≤5 %                                                | ≤10% | ≤15% | ≤25 % | ≤35 % | ≤40% |
| DVSFGSGVLTVK <sub>135</sub> LGG                          | DLGTYVINK <sub>147</sub> QTPNK <sub>152</sub> QIWLSSP<br>SSGPK <sub>164</sub> RY                                    |        |                                     |                                                           |                                                            | 4             |                                                     |      |      | 1     |       | 3    |
| K <sub>135</sub>                                         | K <sub>147</sub>                                                                                                    |        | 17.6±0.7                            | 33.0±1.8                                                  | 17.3±3.9                                                   |               |                                                     |      |      |       |       |      |
| K <sub>135</sub>                                         | K <sub>152</sub>                                                                                                    | 6D     | 24.3±0.7                            | 28.4±1.5                                                  | 17.5±2.7                                                   |               |                                                     |      |      |       |       |      |
| K <sub>135</sub>                                         | K <sub>164</sub>                                                                                                    | 6B,D   | 18.4±0.8                            | 34.7±1.1                                                  | 14.3±2.2                                                   |               |                                                     |      |      |       |       |      |
| <b>LOW SCORE PEPTIDE</b>                                 |                                                                                                                     |        |                                     |                                                           |                                                            |               | ≤5 %                                                | ≤10% | ≤15% | ≤25 % | ≤35 % | ≤40% |
| DK <sub>116</sub> PY <sub>118</sub> TFEDY <sub>123</sub> | DVSFGSGVLTVK <sub>135</sub> LGGDLGTYVIN<br>K <sub>147</sub> QTPNK <sub>152</sub> QIWLSSPSSGPK <sub>164</sub> R<br>Y |        |                                     |                                                           |                                                            | 3             |                                                     |      |      |       |       | 3    |
| K <sub>116</sub>                                         | K <sub>135</sub>                                                                                                    | 6B     | 18.0±2.9                            | 52.2±2.2                                                  | 26.0±1.8                                                   |               |                                                     |      |      |       |       |      |
| K <sub>116</sub>                                         | K <sub>147</sub>                                                                                                    |        | 27.7±1.1                            | 46.4±1.3                                                  | 37.7±2.1                                                   |               |                                                     |      |      |       |       |      |
| K <sub>116</sub>                                         | K <sub>152</sub>                                                                                                    |        | 33.0±0.7                            | 40.5±1.1                                                  | 36.8±3.0                                                   |               |                                                     |      |      |       |       |      |
| K <sub>116</sub>                                         | K <sub>164</sub>                                                                                                    |        | 29.4±1.2                            | 37.7±0.7                                                  | 33.6±1.9                                                   |               |                                                     |      |      |       |       |      |
| Y <sub>118</sub>                                         | K <sub>135</sub>                                                                                                    | 6B     | 17.8±2.8                            | 55.9±1.8                                                  | 30.3±3.2                                                   |               |                                                     |      |      |       |       |      |
| Y <sub>118</sub>                                         | K <sub>147</sub>                                                                                                    |        | 29.0±1.5                            | 46.5±1.1                                                  | 32.7±2.4                                                   |               |                                                     |      |      |       |       |      |
| Y <sub>118</sub>                                         | K <sub>152</sub>                                                                                                    |        | 34.5±0.7                            | 40.7±1.1                                                  | 33.9±2.0                                                   |               |                                                     |      |      |       |       |      |
| Y <sub>118</sub>                                         | K <sub>164</sub>                                                                                                    |        | 28.6±1.4                            | 40.6±0.5                                                  | 30.5±1.7                                                   |               |                                                     |      |      |       |       |      |
| Y <sub>123</sub>                                         | K <sub>135</sub>                                                                                                    | 6B,D   | 7.7±2.5                             | 51.1±3.1                                                  | 22.6±1.9                                                   |               |                                                     |      |      |       |       |      |
| Y <sub>123</sub>                                         | K <sub>147</sub>                                                                                                    | 6B,D   | 21.6±0.8                            | 39.2±0.6                                                  | 22.5±3.1                                                   |               |                                                     |      |      |       |       |      |
| Y <sub>123</sub>                                         | K <sub>152</sub>                                                                                                    |        | 28.2±1.2                            | 33.9±0.6                                                  | 24.2±2.2                                                   |               |                                                     |      |      |       |       |      |
| Y <sub>123</sub>                                         | K <sub>164</sub>                                                                                                    | 6B,D   | 22.9±1.2                            | 36.7±1.4                                                  | 21.7±1.6                                                   |               |                                                     |      |      |       |       |      |

Supplemental Table S2b, p.1

| Cross-linked peptides                                     |                                                                                                                         | Figure | Distances (Å) measured in structure |                        |                         | # of peptides | False Discovery Rate (FDR) of cross-linked peptides |      |      |       |       |      |
|-----------------------------------------------------------|-------------------------------------------------------------------------------------------------------------------------|--------|-------------------------------------|------------------------|-------------------------|---------------|-----------------------------------------------------|------|------|-------|-------|------|
| ISCU                                                      | ISCU                                                                                                                    |        | ISCU intra-monomer                  | ISCU-ISCU intra-trimer | ISCU-ISCU inter-trimers |               | ≤5 %                                                | ≤10% | ≤15% | ≤25 % | ≤35 % | ≤60% |
| <b>Single digestion GluC</b>                              |                                                                                                                         |        |                                     |                        |                         |               | ≤5 %                                                | ≤10% | ≤15% | ≤25 % | ≤35 % | ≤60% |
| AEK <sub>166</sub> K <sub>167</sub>                       | DAIK <sub>147</sub> AALADY <sub>153</sub> K <sub>154</sub> LK <sub>156</sub> QEPK <sub>160</sub><br>K <sub>161</sub> GE |        |                                     |                        |                         | 21            | 12                                                  | 3    | 6    |       |       |      |
| K <sub>166</sub>                                          | K <sub>147</sub>                                                                                                        | 6F     | 9.5 ± 1.0                           | 24.4 ± 0.9             | 46.5 ± 0.7              |               |                                                     |      |      |       |       |      |
| K <sub>166</sub>                                          | Y <sub>153</sub>                                                                                                        |        | 14.0 ± 1.0                          | 23.4 ± 1.1             | 56.1 ± 0.8              |               |                                                     |      |      |       |       |      |
| K <sub>166</sub>                                          | K <sub>154</sub>                                                                                                        | 6F,G   | 11.7 ± 1.0                          | 20.2 ± 2.2             | 56.4 ± 0.7              |               |                                                     |      |      |       |       |      |
| K <sub>166</sub>                                          | K <sub>156</sub>                                                                                                        | 6G     | 16.6 ± 1.0                          | 22.2 ± 2.0             | 60.8 ± 0.8              |               |                                                     |      |      |       |       |      |
| K <sub>166</sub>                                          | K <sub>160</sub>                                                                                                        |        | 10.8 ± 0.4                          | 13.0 ± 1.8             | 58.8 ± 0.5              |               |                                                     |      |      |       |       |      |
| K <sub>166</sub>                                          | K <sub>161</sub>                                                                                                        | 6F,G   | 9.1 ± 0.6                           | 11.2 ± 1.7             | 57.2 ± 0.4              |               |                                                     |      |      |       |       |      |
| K <sub>167</sub>                                          | K <sub>147</sub>                                                                                                        |        | 6.9 ± 0.8                           | 25.6 ± 0.8             | 45.0 ± 1.1              |               |                                                     |      |      |       |       |      |
| K <sub>167</sub>                                          | Y <sub>153</sub>                                                                                                        |        | 12.7 ± 1.3                          | 24.3 ± 1.1             | 54.6 ± 1.2              |               |                                                     |      |      |       |       |      |
| K <sub>167</sub>                                          | K <sub>154</sub>                                                                                                        | 6F     | 11.0 ± 1.1                          | 21.9 ± 1.1             | 55.1 ± 1.0              |               |                                                     |      |      |       |       |      |
| K <sub>167</sub>                                          | K <sub>156</sub>                                                                                                        | 6F     | 15.7 ± 1.4                          | 23.4 ± 1.4             | 59.4 ± 1.2              |               |                                                     |      |      |       |       |      |
| K <sub>167</sub>                                          | K <sub>160</sub>                                                                                                        | 6F,G   | 11.5 ± 0.4                          | 15.0 ± 1.0             | 57.9 ± 0.4              |               |                                                     |      |      |       |       |      |
| K <sub>167</sub>                                          | K <sub>161</sub>                                                                                                        |        | 10.9 ± 0.6                          | 13.8 ± 0.9             | 56.5 ± 0.4              |               |                                                     |      |      |       |       |      |
|                                                           |                                                                                                                         |        |                                     |                        |                         |               | ≤5 %                                                | ≤10% | ≤15% | ≤25 % | ≤35 % | ≤60% |
| WVK <sub>110</sub> GK <sub>112</sub> T <sub>113</sub> VEE | ALT <sub>119</sub> IK <sub>121</sub> NT <sub>123</sub> DIAK <sub>127</sub> E                                            |        |                                     |                        |                         | 23            | 17                                                  |      | 6    |       | 2     |      |
| K <sub>110</sub>                                          | T <sub>119</sub>                                                                                                        |        | 13.9 ± 0.5                          | 30.4 ± 0.7             | 45.8 ± 1.1              |               |                                                     |      |      |       |       |      |
| K <sub>110</sub>                                          | K <sub>121</sub>                                                                                                        |        | 15.1 ± 0.3                          | 33.6 ± 0.6             | 39.4 ± 1.2              |               |                                                     |      |      |       |       |      |
| K <sub>110</sub>                                          | T <sub>123</sub>                                                                                                        |        | 17.3 ± 0.2                          | 38.6 ± 0.6             | 35.8 ± 1.2              |               |                                                     |      |      |       |       |      |
| K <sub>110</sub>                                          | K <sub>127</sub>                                                                                                        | 6F     | 16.1 ± 0.5                          | 43.5 ± 0.6             | 36.0 ± 1.2              |               |                                                     |      |      |       |       |      |
| K <sub>112</sub>                                          | T <sub>119</sub>                                                                                                        |        | 11.2 ± 0.2                          | 25.3 ± 0.7             | 46.8 ± 1.2              |               |                                                     |      |      |       |       |      |
| K <sub>112</sub>                                          | K <sub>121</sub>                                                                                                        | 6F,G   | 14.3 ± 0.5                          | 28.4 ± 0.6             | 40.4 ± 1.2              |               |                                                     |      |      |       |       |      |
| K <sub>112</sub>                                          | T <sub>123</sub>                                                                                                        |        | 16.8 ± 0.6                          | 33.3 ± 0.7             | 36.8 ± 1.3              |               |                                                     |      |      |       |       |      |
| K <sub>112</sub>                                          | K <sub>127</sub>                                                                                                        | 6F     | 16.4 ± 0.9                          | 38.4 ± 0.6             | 37.5 ± 1.3              |               |                                                     |      |      |       |       |      |
| T <sub>113</sub>                                          | K <sub>121</sub>                                                                                                        |        | 15.0 ± 0.4                          | 25.7 ± 0.6             | 42.5 ± 0.9              |               |                                                     |      |      |       |       |      |
| T <sub>113</sub>                                          | K <sub>127</sub>                                                                                                        |        | 18.9 ± 0.9                          | 35.6 ± 0.6             | 39.1 ± 1.0              |               |                                                     |      |      |       |       |      |
|                                                           |                                                                                                                         |        |                                     |                        |                         |               | ≤5 %                                                | ≤10% | ≤20% | ≤25 % | ≤35 % | ≤60% |
| AEK <sub>166</sub> K <sub>167</sub>                       | K <sub>160</sub> K <sub>161</sub> GEAE                                                                                  |        |                                     |                        |                         | 15            | 10                                                  | 3    | 2    |       | 5     |      |
| K <sub>166</sub>                                          | K <sub>160</sub>                                                                                                        |        | 10.8 ± 0.4                          | 13.0 ± 1.8             | 58.8 ± 0.5              |               |                                                     |      |      |       |       |      |
| K <sub>166</sub>                                          | K <sub>161</sub>                                                                                                        | 6F,G   | 9.1 ± 0.6                           | 11.2 ± 1.7             | 57.2 ± 0.4              |               |                                                     |      |      |       |       |      |
| K <sub>167</sub>                                          | K <sub>160</sub>                                                                                                        | 6F,G   | 11.5 ± 0.4                          | 15.0 ± 1.0             | 57.9 ± 0.4              |               |                                                     |      |      |       |       |      |
| K <sub>167</sub>                                          | K <sub>161</sub>                                                                                                        |        | 10.9 ± 0.6                          | 13.8 ± 0.9             | 56.5 ± 0.4              |               |                                                     |      |      |       |       |      |

Supplemental Table S2b, p.2

| Cross-linked peptides                 |                                                                                 | Figure | Distances (Å) measured in structure |                        |                         | # of peptides | False Discovery Rate (FDR) of cross-linked peptides |      |      |       |       |      |
|---------------------------------------|---------------------------------------------------------------------------------|--------|-------------------------------------|------------------------|-------------------------|---------------|-----------------------------------------------------|------|------|-------|-------|------|
| ISCU                                  | ISCU                                                                            |        | ISCU intra-monomer                  | ISCU-ISCU intra-trimer | ISCU-ISCU inter-trimers |               | ≤5 %                                                | ≤10% | ≤20% | ≤25 % | ≤35 % | ≤60% |
| PK <sub>160</sub> K <sub>161</sub> GE | DAIK <sub>147</sub> AALADY <sub>153</sub> K <sub>154</sub> LK <sub>156</sub> QE |        |                                     |                        |                         | 7             | 4                                                   | 1    | 2    |       |       |      |
| K <sub>160</sub>                      | K <sub>147</sub>                                                                | 6F,G   | 14.7 ± 1.1                          | 15.9 ± 0.8             | 56.4 ± 1.1              |               |                                                     |      |      |       |       |      |
| K <sub>160</sub>                      | Y <sub>153</sub>                                                                |        | 11.3 ± 0.8                          | 12.9 ± 1.2             | 65.9 ± 1.2              |               |                                                     |      |      |       |       |      |
| K <sub>160</sub>                      | K <sub>154</sub>                                                                | 6F     | 7.6 ± 0.9                           | 10.7 ± 1.2             | 66.5 ± 1.0              |               |                                                     |      |      |       |       |      |
| K <sub>160</sub>                      | K <sub>156</sub>                                                                | 6F,G   | 10.0 ± 0.4                          | 14.0 ± 1.2             | 70.8 ± 1.1              |               |                                                     |      |      |       |       |      |
| K <sub>161</sub>                      | K <sub>147</sub>                                                                |        | 15.1 ± 0.8                          | 16.3 ± 0.9             | 55.4 ± 0.9              |               |                                                     |      |      |       |       |      |
| K <sub>161</sub>                      | Y <sub>153</sub>                                                                |        | 13.5 ± 0.6                          | 14.7 ± 1.2             | 65.1 ± 0.9              |               |                                                     |      |      |       |       |      |
| K <sub>161</sub>                      | K <sub>154</sub>                                                                | 6G     | 9.7 ± 0.6                           | 11.8 ± 1.3             | 65.4 ± 0.8              |               |                                                     |      |      |       |       |      |
| K <sub>161</sub>                      | K <sub>156</sub>                                                                |        | 13.1 ± 0.3                          | 15.6 ± 1.3             | 69.8 ± 0.9              |               |                                                     |      |      |       |       |      |
|                                       |                                                                                 |        |                                     |                        |                         |               | ≤5 %                                                | ≤10% | ≤15% | ≤25 % | ≤35 % | ≤60% |
| AEK <sub>166</sub> K <sub>167</sub>   | ALT <sub>119</sub> IK <sub>121</sub> NT <sub>123</sub> DIAK <sub>127</sub> E    |        |                                     |                        |                         | 7             | 3                                                   | 1    | 1    | 2     | 1     |      |
| K <sub>166</sub>                      | T <sub>119</sub>                                                                |        | 7.0 ± 1.5                           | 18.3 ± 0.8             | 44.5 ± 0.6              |               |                                                     |      |      |       |       |      |
| K <sub>166</sub>                      | K <sub>121</sub>                                                                | 6F,G   | 11.5 ± 0.8                          | 24.5 ± 0.9             | 38.6 ± 0.5              |               |                                                     |      |      |       |       |      |
| K <sub>166</sub>                      | T <sub>123</sub>                                                                |        | 16.4 ± 0.8                          | 27.7 ± 1.1             | 33.8 ± 0.5              |               |                                                     |      |      |       |       |      |
| K <sub>166</sub>                      | K <sub>127</sub>                                                                |        | 20.9 ± 1.0                          | 29.7 ± 1.3             | 33.1 ± 0.6              |               |                                                     |      |      |       |       |      |
| K <sub>167</sub>                      | T <sub>119</sub>                                                                |        | 7.9 ± 1.5                           | 19.6 ± 1.0             | 43.3 ± 0.7              |               |                                                     |      |      |       |       |      |
| K <sub>167</sub>                      | K <sub>121</sub>                                                                |        | 10.7 ± 1.3                          | 25.6 ± 1.0             | 37.3 ± 0.6              |               |                                                     |      |      |       |       |      |
| K <sub>167</sub>                      | T <sub>123</sub>                                                                |        | 15.8 ± 1.3                          | 28.7 ± 1.2             | 32.4 ± 0.6              |               |                                                     |      |      |       |       |      |
| K <sub>167</sub>                      | K <sub>127</sub>                                                                | 6F,H   | 20.5 ± 1.2                          | 29.9 ± 1.3             | 31.2 ± 0.6              |               |                                                     |      |      |       |       |      |
|                                       |                                                                                 |        |                                     |                        |                         |               | ≤5 %                                                | ≤10% | ≤15% | ≤25 % | ≤35 % | ≤60% |
| PK <sub>160</sub> K <sub>161</sub> GE | WVK <sub>110</sub> GK <sub>112</sub> T <sub>113</sub> VEE                       |        |                                     |                        |                         | 2             |                                                     | 1    |      | 1     |       |      |
| K <sub>160</sub>                      | K <sub>110</sub>                                                                | 6G     | 23.2 ± 1.2                          | 16.5 ± 0.8             | 57.4 ± 1.2              |               |                                                     |      |      |       |       |      |
| K <sub>160</sub>                      | K <sub>112</sub>                                                                | 6F     | 20.9 ± 1.2                          | 12.5 ± 0.9             | 58.3 ± 1.5              |               |                                                     |      |      |       |       |      |
| K <sub>160</sub>                      | T <sub>113</sub>                                                                |        | 17.7 ± 1.2                          | 8.8 ± 0.9              | 60.8 ± 1.3              |               |                                                     |      |      |       |       |      |
| K <sub>161</sub>                      | K <sub>110</sub>                                                                |        | 23.1 ± 1.0                          | 18.9 ± 0.8             | 57.1 ± 1.0              |               |                                                     |      |      |       |       |      |
| K <sub>161</sub>                      | K <sub>112</sub>                                                                |        | 20.0 ± 1.1                          | 14.6 ± 0.9             | 57.8 ± 1.4              |               |                                                     |      |      |       |       |      |
| K <sub>161</sub>                      | T <sub>113</sub>                                                                |        | 16.8 ± 1.1                          | 10.9 ± 0.9             | 60.1 ± 1.2              |               |                                                     |      |      |       |       |      |
|                                       |                                                                                 |        |                                     |                        |                         |               | ≤5 %                                                | ≤10% | ≤15% | ≤25 % | ≤35 % | ≤60% |
| PK <sub>160</sub> K <sub>161</sub> GE | PK <sub>160</sub> K <sub>161</sub> GE                                           |        |                                     |                        |                         | 4             |                                                     |      | 2    | 2     |       |      |
| K <sub>160</sub>                      | K <sub>160</sub>                                                                | 6G     | NA                                  | 11.8 ± 0.7             | 69.1 ± 0.2              |               |                                                     |      |      |       |       |      |
| K <sub>160</sub>                      | K <sub>161</sub>                                                                |        | 3.8 ± 0.04                          | 10.5 ± 0.5             | 67.6 ± 0.3              |               |                                                     |      |      |       |       |      |
| K <sub>161</sub>                      | K <sub>160</sub>                                                                |        | 3.8 ± 0.04                          | 10.5 ± 0.5             | 67.6 ± 0.3              |               |                                                     |      |      |       |       |      |
| K <sub>161</sub>                      | K <sub>161</sub>                                                                |        | NA                                  | 8.4 ± 0.6              | 66.1 ± 0.1              |               |                                                     |      |      |       |       |      |

Supplemental Table S2b, p.3

| Cross-linked peptides                                                        |                  | Figure | Distances (Å) measured in structure |                        |                         | # of peptides | False Discovery Rate (FDR) of cross-linked peptides |      |      |       |       |      |  |  |
|------------------------------------------------------------------------------|------------------|--------|-------------------------------------|------------------------|-------------------------|---------------|-----------------------------------------------------|------|------|-------|-------|------|--|--|
| ISCU                                                                         | ISCU             |        | ISCU intra-monomer                  | ISCU-ISCU intra-trimer | ISCU-ISCU inter-trimers |               | ≤5 %                                                | ≤10% | ≤15% | ≤25 % | ≤35 % | ≤60% |  |  |
| ALT <sub>119</sub> IK <sub>121</sub> NT <sub>123</sub> DIAK <sub>127</sub> E |                  |        |                                     |                        |                         | 2             | 2                                                   |      |      |       |       |      |  |  |
| K <sub>121</sub>                                                             | K <sub>135</sub> |        | 13.5 ± 0.8                          | 44.8 ± 1.3             | 17.2 ± 1.6              |               |                                                     |      |      |       |       |      |  |  |
| K <sub>121</sub>                                                             | S <sub>139</sub> |        | 10.5 ± 1.1                          | 41.8 ± 1.4             | 20.5 ± 1.1              |               |                                                     |      |      |       |       |      |  |  |
| K <sub>127</sub>                                                             | K <sub>135</sub> | 6F,H   | 12.0±0.7                            | 46.4±1.5               | 12.9±1.5                |               |                                                     |      |      |       |       |      |  |  |
| K <sub>127</sub>                                                             | S <sub>139</sub> | 6H     | 11.2±1.1                            | 43.7±1.4               | 15.5±1.2                |               |                                                     |      |      |       |       |      |  |  |
| <b>Double digestion GluC&amp;AspN</b>                                        |                  |        |                                     |                        |                         |               | ≤5 %                                                | ≤10% | ≤20% | ≤25 % | ≤35 % | ≤60% |  |  |
| AEK <sub>166</sub> K <sub>167</sub>                                          |                  |        |                                     |                        |                         | 18            | 6                                                   | 3    | 7    | 2     |       |      |  |  |
| K <sub>166</sub>                                                             | Y <sub>153</sub> |        | 14.0 ± 1.0                          | 23.4 ± 1.1             | 56.1 ± 0.8              |               |                                                     |      |      |       |       |      |  |  |
| K <sub>166</sub>                                                             | K <sub>154</sub> |        | 11.7 ± 1.0                          | 20.2 ± 2.2             | 56.4 ± 0.7              |               |                                                     |      |      |       |       |      |  |  |
| K <sub>166</sub>                                                             | K <sub>156</sub> |        | 16.6 ± 1.0                          | 22.2 ± 2.0             | 60.8 ± 0.8              |               |                                                     |      |      |       |       |      |  |  |
| K <sub>166</sub>                                                             | K <sub>160</sub> |        | 10.8 ± 0.4                          | 13.0 ± 1.8             | 58.8 ± 0.5              |               |                                                     |      |      |       |       |      |  |  |
| K <sub>166</sub>                                                             | K <sub>161</sub> |        | 9.1 ± 0.6                           | 11.2 ± 1.7             | 57.2 ± 0.4              |               |                                                     |      |      |       |       |      |  |  |
| K <sub>167</sub>                                                             | Y <sub>153</sub> |        | 12.7 ± 1.3                          | 24.3 ± 1.1             | 54.6 ± 1.2              |               |                                                     |      |      |       |       |      |  |  |
| K <sub>167</sub>                                                             | K <sub>154</sub> |        | 11.0 ± 1.1                          | 21.9 ± 1.1             | 55.1 ± 1.0              |               |                                                     |      |      |       |       |      |  |  |
| K <sub>167</sub>                                                             | K <sub>156</sub> |        | 15.7 ± 1.4                          | 23.4 ± 1.4             | 59.4 ± 1.2              |               |                                                     |      |      |       |       |      |  |  |
| K <sub>167</sub>                                                             | K <sub>160</sub> |        | 11.5 ± 0.4                          | 15.0 ± 1.0             | 57.9 ± 0.4              |               |                                                     |      |      |       |       |      |  |  |
| K <sub>167</sub>                                                             | K <sub>161</sub> |        | 10.9 ± 0.6                          | 13.8 ± 0.9             | 56.5 ± 0.4              |               |                                                     |      |      |       |       |      |  |  |
| AEK <sub>166</sub> K <sub>167</sub>                                          |                  |        |                                     |                        |                         | 5             | 2                                                   | 1    | 2    |       |       |      |  |  |
| K <sub>166</sub>                                                             | K <sub>54</sub>  |        | 28.0±1.1                            | 30.1±1.6               | 66.3±1.1                |               |                                                     |      |      |       |       |      |  |  |
| K <sub>166</sub>                                                             | T <sub>55</sub>  |        | 25.3±1.3                            | 26.5±1.7               | 64.1±0.9                |               |                                                     |      |      |       |       |      |  |  |
| K <sub>166</sub>                                                             | S <sub>56</sub>  |        | 21.9±1.2                            | 24.1±1.6               | 62.8±0.8                |               |                                                     |      |      |       |       |      |  |  |
| K <sub>166</sub>                                                             | K <sub>57</sub>  | 6F     | 20.6±1.1                            | 24.9±1.9               | 62.7±0.9                |               |                                                     |      |      |       |       |      |  |  |
| K <sub>166</sub>                                                             | T <sub>61</sub>  |        | 17.8±1.2                            | 30.1±1.1               | 53.4±1.4                |               |                                                     |      |      |       |       |      |  |  |
| K <sub>167</sub>                                                             | K <sub>54</sub>  |        | 27.3±1.0                            | 29.3±2.0               | 64.3±1.4                |               |                                                     |      |      |       |       |      |  |  |
| K <sub>167</sub>                                                             | T <sub>55</sub>  |        | 24.9±1.1                            | 25.7±2.1               | 62.1±1.1                |               |                                                     |      |      |       |       |      |  |  |
| K <sub>167</sub>                                                             | S <sub>56</sub>  |        | 21.6±1.0                            | 23.6±1.9               | 61.0±0.9                |               |                                                     |      |      |       |       |      |  |  |
| K <sub>167</sub>                                                             | K <sub>57</sub>  |        | 19.9±1.1                            | 24.9±2.1               | 61.0±0.9                |               |                                                     |      |      |       |       |      |  |  |
| K <sub>167</sub>                                                             | T <sub>61</sub>  |        | 15.2±1.6                            | 30.8±1.1               | 51.6±1.6                |               |                                                     |      |      |       |       |      |  |  |



Supplemental Table S2b, p.4

| Cross-linked peptides                                                                        |                                                                                               | Figure | Distances (Å) measured in structure |                        |                         | # of peptides | False Discovery Rate (FDR) of cross-linked peptides |      |      |       |       |      |
|----------------------------------------------------------------------------------------------|-----------------------------------------------------------------------------------------------|--------|-------------------------------------|------------------------|-------------------------|---------------|-----------------------------------------------------|------|------|-------|-------|------|
| ISCU                                                                                         | ISCU                                                                                          |        | ISCU intra-monomer                  | ISCU-ISCU intra-trimer | ISCU-ISCU inter-trimers |               | ≤5 %                                                | ≤10% | ≤20% | ≤25 % | ≤35 % | ≤60% |
| K <sub>82</sub> GK <sub>84</sub> IV                                                          | WVK <sub>110</sub> GK <sub>112</sub> TVEE                                                     |        |                                     |                        |                         | 5             | 1                                                   | 1    | 1    | 2     |       |      |
| K <sub>82</sub>                                                                              | K <sub>110</sub>                                                                              |        | 13.8±0.5                            | 25.2±0.4               | 58.2±0.6                |               |                                                     |      |      |       |       |      |
| K <sub>82</sub>                                                                              | K <sub>112</sub>                                                                              | 6F     | 11.1±0.9                            | 23.8±0.8               | 59.7±1.7                |               |                                                     |      |      |       |       |      |
| K <sub>84</sub>                                                                              | K <sub>110</sub>                                                                              |        | 7.3±0.3                             | 30.9±0.6               | 54.7±0.4                |               |                                                     |      |      |       |       |      |
| K <sub>84</sub>                                                                              | K <sub>112</sub>                                                                              |        | 5.7±1.0                             | 29.9±0.8               | 56.7±0.8                |               |                                                     |      |      |       |       |      |
|                                                                                              |                                                                                               |        |                                     |                        |                         |               | ≤5 %                                                | ≤10% | ≤20% | ≤25 % | ≤35 % | ≤60% |
| DY <sub>153</sub> K <sub>154</sub> LK <sub>156</sub> QEPK <sub>160</sub> K <sub>161</sub> GE | DK <sub>54</sub> T <sub>55</sub> S <sub>56</sub> K <sub>57</sub> NVGT <sub>61</sub> GLVGAPACG |        |                                     |                        |                         | 4             | 3                                                   |      | 1    |       |       |      |
| K <sub>154</sub>                                                                             | K <sub>54</sub>                                                                               |        | 17.5±0.4                            | 19.9±0.9               | 71.4±0.8                |               |                                                     |      |      |       |       |      |
| K <sub>154</sub>                                                                             | T <sub>55</sub>                                                                               |        | 15.3±0.3                            | 16.5±0.9               | 69.6±0.5                |               |                                                     |      |      |       |       |      |
| K <sub>154</sub>                                                                             | S <sub>56</sub>                                                                               |        | 11.8±0.3                            | 14.4±0.6               | 68.7±0.6                |               |                                                     |      |      |       |       |      |
| K <sub>154</sub>                                                                             | K <sub>57</sub>                                                                               |        | 9.5±0.5                             | 15.6±1.0               | 68.6±0.6                |               |                                                     |      |      |       |       |      |
| K <sub>154</sub>                                                                             | T <sub>61</sub>                                                                               |        | 10.8±0.2                            | 24.6±0.4               | 58.5±0.7                |               |                                                     |      |      |       |       |      |
| K <sub>156</sub>                                                                             | K <sub>54</sub>                                                                               | 6F     | 14.7±0.6                            | 14.9±0.9               | 74.6±0.8                |               |                                                     |      |      |       |       |      |
| K <sub>156</sub>                                                                             | T <sub>55</sub>                                                                               |        | 13.4±0.4                            | 11.8±1.0               | 72.8±0.7                |               |                                                     |      |      |       |       |      |
| K <sub>156</sub>                                                                             | S <sub>56</sub>                                                                               |        | 10.1±0.4                            | 10.1±0.6               | 72.1±0.4                |               |                                                     |      |      |       |       |      |
| K <sub>156</sub>                                                                             | K <sub>57</sub>                                                                               |        | 6.7±0.3                             | 12.0±0.8               | 72.2±0.4                |               |                                                     |      |      |       |       |      |
| K <sub>156</sub>                                                                             | T <sub>61</sub>                                                                               |        | 11.0±0.4                            | 22.4±0.05              | 62.1±0.5                |               |                                                     |      |      |       |       |      |
| K <sub>160</sub>                                                                             | K <sub>54</sub>                                                                               | 6G     | 23.7±0.8                            | 20.6±1.1               | 75.5±1.5                |               |                                                     |      |      |       |       |      |
| K <sub>160</sub>                                                                             | T <sub>55</sub>                                                                               |        | 21.4±0.6                            | 17.1±1.1               | 73.4±1.2                |               |                                                     |      |      |       |       |      |
| K <sub>160</sub>                                                                             | S <sub>56</sub>                                                                               |        | 17.7±0.6                            | 14.1±1.2               | 72.3±1.1                |               |                                                     |      |      |       |       |      |
| K <sub>160</sub>                                                                             | K <sub>57</sub>                                                                               |        | 15.4±0.8                            | 14.6±1.7               | 72.4±1.1                |               |                                                     |      |      |       |       |      |
| K <sub>160</sub>                                                                             | T <sub>61</sub>                                                                               |        | 17.4±0.9                            | 19.7±1.2               | 62.9±1.6                |               |                                                     |      |      |       |       |      |
| K <sub>161</sub>                                                                             | K <sub>54</sub>                                                                               |        | 25.8±0.7                            | 24.0±1.0               | 75.1±1.3                |               |                                                     |      |      |       |       |      |
| K <sub>161</sub>                                                                             | T <sub>55</sub>                                                                               |        | 23.2±0.5                            | 20.6±1.0               | 72.9±1.0                |               |                                                     |      |      |       |       |      |
| K <sub>161</sub>                                                                             | S <sub>56</sub>                                                                               |        | 19.6±0.6                            | 17.5±1.1               | 71.7±0.9                |               |                                                     |      |      |       |       |      |
| K <sub>161</sub>                                                                             | K <sub>57</sub>                                                                               |        | 17.8±0.9                            | 17.4±1.6               | 71.7±0.9                |               |                                                     |      |      |       |       |      |
| K <sub>161</sub>                                                                             | T <sub>61</sub>                                                                               |        | 19.7±0.7                            | 21.5±1.1               | 62.2±1.4                |               |                                                     |      |      |       |       |      |
| Y <sub>153</sub>                                                                             | K <sub>54</sub>                                                                               |        | 15.1±0.6                            | 20.0±1.0               | 69.8±0.7                |               |                                                     |      |      |       |       |      |
| Y <sub>153</sub>                                                                             | K <sub>57</sub>                                                                               |        | 7.8±0.4                             | 17.1±0.9               | 67.3±0.5                |               |                                                     |      |      |       |       |      |

Supplemental Table S2b, p.5

| Cross-linked peptides                                             |                                                                                               | Figure | Distances (Å) measured in structure |                        |                         | # of peptides | False Discovery Rate (FDR) of cross-linked peptides |      |      |       |       |      |  |  |
|-------------------------------------------------------------------|-----------------------------------------------------------------------------------------------|--------|-------------------------------------|------------------------|-------------------------|---------------|-----------------------------------------------------|------|------|-------|-------|------|--|--|
| ISCU                                                              | ISCU                                                                                          |        | ISCU intra-monomer                  | ISCU-ISCU intra-trimer | ISCU-ISCU inter-trimers |               | ≤5 %                                                | ≤10% | ≤20% | ≤25 % | ≤35 % | ≤60% |  |  |
| PK <sub>160</sub> K <sub>161</sub> GE                             | DY <sub>153</sub> K <sub>154</sub> LK <sub>156</sub> QE                                       |        |                                     |                        |                         | 4             | 1                                                   |      | 1    | 2     |       |      |  |  |
| K <sub>160</sub>                                                  | Y <sub>153</sub>                                                                              |        | 11.3 ± 0.8                          | 12.9 ± 1.2             | 65.9 ± 1.2              |               |                                                     |      |      |       |       |      |  |  |
| K <sub>160</sub>                                                  | K <sub>154</sub>                                                                              |        | 7.6 ± 0.9                           | 10.7 ± 1.2             | 66.5 ± 1.0              |               |                                                     |      |      |       |       |      |  |  |
| K <sub>160</sub>                                                  | K <sub>156</sub>                                                                              |        | 10.0 ± 0.4                          | 14.0 ± 1.2             | 70.8 ± 1.1              |               |                                                     |      |      |       |       |      |  |  |
| K <sub>161</sub>                                                  | Y <sub>153</sub>                                                                              |        | 13.5 ± 0.6                          | 14.7 ± 1.2             | 65.1 ± 0.9              |               |                                                     |      |      |       |       |      |  |  |
| K <sub>161</sub>                                                  | K <sub>154</sub>                                                                              |        | 9.7 ± 0.6                           | 11.8 ± 1.3             | 65.4 ± 0.8              |               |                                                     |      |      |       |       |      |  |  |
| K <sub>161</sub>                                                  | K <sub>156</sub>                                                                              |        | 13.1 ± 0.3                          | 15.6 ± 1.3             | 69.8 ± 0.9              |               |                                                     |      |      |       |       |      |  |  |
|                                                                   |                                                                                               |        |                                     |                        |                         |               | ≤5 %                                                | ≤10% | ≤20% | ≤25 % | ≤35 % | ≤60% |  |  |
| DIAK <sub>127</sub> E                                             | WVK <sub>110</sub> GK <sub>112</sub> TVEE                                                     |        |                                     |                        |                         | 3             |                                                     | 1    | 1    | 1     |       |      |  |  |
| K <sub>127</sub>                                                  | K <sub>110</sub>                                                                              |        | 16.1 ± 0.5                          | 43.5 ± 0.6             | 36.0 ± 1.2              |               |                                                     |      |      |       |       |      |  |  |
| K <sub>127</sub>                                                  | K <sub>112</sub>                                                                              |        | 16.4 ± 0.9                          | 38.4 ± 0.6             | 37.5 ± 1.3              |               |                                                     |      |      |       |       |      |  |  |
|                                                                   |                                                                                               |        |                                     |                        |                         |               | ≤5 %                                                | ≤10% | ≤20% | ≤25 % | ≤35 % | ≤60% |  |  |
| DVMK <sub>74</sub> LQIQV                                          | DK <sub>54</sub> T <sub>55</sub> S <sub>56</sub> K <sub>57</sub> NVGT <sub>61</sub> GLVGAPACG |        |                                     |                        |                         | 2             | 2                                                   |      |      |       |       |      |  |  |
| K <sub>74</sub>                                                   | K <sub>54</sub>                                                                               |        | 22.8±1.0                            | 30.1±1.1               | 57.1±1.0                |               |                                                     |      |      |       |       |      |  |  |
| K <sub>74</sub>                                                   | T <sub>55</sub>                                                                               |        | 22.3±0.8                            | 27.2±0.9               | 55.7±1.1                |               |                                                     |      |      |       |       |      |  |  |
| K <sub>74</sub>                                                   | S <sub>56</sub>                                                                               |        | 20.9±0.3                            | 27.2±0.7               | 55.4±0.6                |               |                                                     |      |      |       |       |      |  |  |
| K <sub>74</sub>                                                   | K <sub>57</sub>                                                                               | 6F     | 19.5±0.3                            | 29.9±0.6               | 55.6±0.7                |               |                                                     |      |      |       |       |      |  |  |
| K <sub>74</sub>                                                   | T <sub>61</sub>                                                                               |        | 7.6±0.2                             | 38.5±0.7               | 45.6±0.4                |               |                                                     |      |      |       |       |      |  |  |
|                                                                   |                                                                                               |        |                                     |                        |                         |               | ≤5 %                                                | ≤10% | ≤20% | ≤25 % | ≤35 % | ≤60% |  |  |
| n-MHK <sub>37</sub> K <sub>38</sub> VVDHYENPRNVGS <sub>51</sub> L | DK <sub>54</sub> T <sub>55</sub> S <sub>56</sub> K <sub>57</sub> NVGT <sub>61</sub> GLVGAPACG |        |                                     |                        |                         | 1             | 1                                                   |      |      |       |       |      |  |  |
| N-term                                                            |                                                                                               |        |                                     |                        |                         |               |                                                     |      |      |       |       |      |  |  |
| K <sub>37</sub>                                                   | K <sub>54</sub>                                                                               |        | NM                                  | NM                     | NM                      |               |                                                     |      |      |       |       |      |  |  |
| K <sub>37</sub>                                                   | T <sub>55</sub>                                                                               |        | NM                                  | NM                     | NM                      |               |                                                     |      |      |       |       |      |  |  |
| K <sub>37</sub>                                                   | S <sub>56</sub>                                                                               |        | NM                                  | NM                     | NM                      |               |                                                     |      |      |       |       |      |  |  |
| K <sub>37</sub>                                                   | K <sub>57</sub>                                                                               |        | NM                                  | NM                     | NM                      |               |                                                     |      |      |       |       |      |  |  |
| K <sub>37</sub>                                                   | T <sub>61</sub>                                                                               |        | NM                                  | NM                     | NM                      |               |                                                     |      |      |       |       |      |  |  |
| K <sub>38</sub>                                                   | K <sub>54</sub>                                                                               |        | NM                                  | NM                     | NM                      |               |                                                     |      |      |       |       |      |  |  |
| K <sub>38</sub>                                                   | T <sub>55</sub>                                                                               |        | NM                                  | NM                     | NM                      |               |                                                     |      |      |       |       |      |  |  |
| K <sub>38</sub>                                                   | S <sub>56</sub>                                                                               |        | NM                                  | NM                     | NM                      |               |                                                     |      |      |       |       |      |  |  |
| K <sub>38</sub>                                                   | K <sub>57</sub>                                                                               |        | NM                                  | NM                     | NM                      |               |                                                     |      |      |       |       |      |  |  |
| K <sub>38</sub>                                                   | T <sub>61</sub>                                                                               |        | NM                                  | NM                     | NM                      |               |                                                     |      |      |       |       |      |  |  |
| S <sub>51</sub>                                                   | K <sub>54</sub>                                                                               |        | 9.0±0.3                             | 26.0±1.0               | 69.3±1.4                |               |                                                     |      |      |       |       |      |  |  |
| S <sub>51</sub>                                                   | K <sub>57</sub>                                                                               |        | 12.3±0.6                            | 23.8±1.3               | 67.6±1.5                |               |                                                     |      |      |       |       |      |  |  |

Supplemental Table S2b, p.6

| Cross-linked peptides                                  |                                                                                                                           | Figure | Distances (Å) measured in structure |                        |                         | # of peptides | False Discovery Rate (FDR) of cross-linked peptides |      |      |       |       |      |  |  |  |
|--------------------------------------------------------|---------------------------------------------------------------------------------------------------------------------------|--------|-------------------------------------|------------------------|-------------------------|---------------|-----------------------------------------------------|------|------|-------|-------|------|--|--|--|
| ISCU                                                   | ISCU                                                                                                                      |        | ISCU intra-monomer                  | ISCU-ISCU intra-trimer | ISCU-ISCU inter-trimers |               | ≤5 %                                                | ≤10% | ≤20% | ≤25 % | ≤35 % | ≤60% |  |  |  |
| WVK <sub>110</sub> GK <sub>112</sub> TVEE              | DK <sub>54</sub> T <sub>55</sub> S <sub>56</sub> K <sub>57</sub> NVGT <sub>61</sub> GLVGAPACG<br>DVMK <sub>74</sub> LQIQV |        |                                     |                        |                         | 1             | 1                                                   |      |      |       |       |      |  |  |  |
| K <sub>110</sub>                                       | K <sub>54</sub>                                                                                                           |        | 19.7±0.6                            | 33.7±1.2               | 62.8±1.0                |               |                                                     |      |      |       |       |      |  |  |  |
| K <sub>110</sub>                                       | T <sub>55</sub>                                                                                                           |        | 17.1±0.8                            | 31.4±0.9               | 61.5±0.8                |               |                                                     |      |      |       |       |      |  |  |  |
| K <sub>110</sub>                                       | S <sub>56</sub>                                                                                                           |        | 16.4±0.6                            | 29.8±0.5               | 60.3±0.4                |               |                                                     |      |      |       |       |      |  |  |  |
| K <sub>110</sub>                                       | K <sub>57</sub>                                                                                                           |        | 17.8±0.8                            | 26.3±0.9               | 59.5±0.4                |               |                                                     |      |      |       |       |      |  |  |  |
| K <sub>110</sub>                                       | T <sub>61</sub>                                                                                                           |        | 16.0±0.4                            | 26.3±1.2               | 48.0±0.5                |               |                                                     |      |      |       |       |      |  |  |  |
| K <sub>110</sub>                                       | K <sub>74</sub>                                                                                                           |        | 16.8±0.8                            | 31.2±1.6               | 41.0±0.9                |               |                                                     |      |      |       |       |      |  |  |  |
| K <sub>112</sub>                                       | K <sub>54</sub>                                                                                                           |        | 21.3±1.1                            | 32.0±1.6               | 65.6±1.1                |               |                                                     |      |      |       |       |      |  |  |  |
| K <sub>112</sub>                                       | T <sub>55</sub>                                                                                                           |        | 18.0±1.2                            | 30.9±1.4               | 64.1±1.0                |               |                                                     |      |      |       |       |      |  |  |  |
| K <sub>112</sub>                                       | S <sub>56</sub>                                                                                                           |        | 16.7±1.4                            | 27.4±1.2               | 62.7±0.9                |               |                                                     |      |      |       |       |      |  |  |  |
| K <sub>112</sub>                                       | K <sub>57</sub>                                                                                                           |        | 18.2±1.6                            | 24.2±1.3               | 61.8±0.9                |               |                                                     |      |      |       |       |      |  |  |  |
| K <sub>112</sub>                                       | T <sub>61</sub>                                                                                                           |        | 18.4±0.8                            | 23.0±1.4               | 50.5±1.0                |               |                                                     |      |      |       |       |      |  |  |  |
| K <sub>112</sub>                                       | K <sub>74</sub>                                                                                                           |        | 20.3±0.9                            | 27.5±1.7               | 43.9±1.3                |               |                                                     |      |      |       |       |      |  |  |  |
|                                                        |                                                                                                                           |        |                                     |                        |                         |               | ≤5 %                                                | ≤10% | ≤20% | ≤25 % | ≤35 % | ≤60% |  |  |  |
| ALT <sub>119</sub> IK <sub>121</sub> NT <sub>123</sub> | DAIK <sub>147</sub> AALA                                                                                                  |        |                                     |                        |                         | 1             | 1                                                   |      |      |       |       |      |  |  |  |
| T <sub>119</sub>                                       | K <sub>147</sub>                                                                                                          |        | 8.8±0.5                             | 25.2±1.0               | 42.2±1.0                |               |                                                     |      |      |       |       |      |  |  |  |
| K <sub>121</sub>                                       | K <sub>147</sub>                                                                                                          |        | 9.6±0.4                             | 31.3±1.1               | 36.0±0.9                |               |                                                     |      |      |       |       |      |  |  |  |
| T <sub>123</sub>                                       | K <sub>147</sub>                                                                                                          |        | 14.4±0.5                            | 34.4±1.1               | 31.3±0.9                |               |                                                     |      |      |       |       |      |  |  |  |
|                                                        |                                                                                                                           |        |                                     |                        |                         |               | ≤5 %                                                | ≤10% | ≤20% | ≤25 % | ≤35 % | ≤60% |  |  |  |
| ALT <sub>119</sub> IK <sub>121</sub> NT <sub>123</sub> | DY <sub>153</sub> K <sub>154</sub> LK <sub>156</sub> QEPK <sub>160</sub> K <sub>161</sub> GE                              |        |                                     |                        |                         | 1             | 1                                                   |      |      |       |       |      |  |  |  |
| T <sub>119</sub>                                       | K <sub>154</sub>                                                                                                          |        | 14.2±0.6                            | 20.6±1.3               | 52.3±1.0                |               |                                                     |      |      |       |       |      |  |  |  |
| K <sub>121</sub>                                       | K <sub>154</sub>                                                                                                          |        | 18.5±0.5                            | 26.8±1.2               | 46.1±0.8                |               |                                                     |      |      |       |       |      |  |  |  |
| T <sub>123</sub>                                       | K <sub>154</sub>                                                                                                          |        | 23.6±0.5                            | 30.9±1.2               | 41.4±0.8                |               |                                                     |      |      |       |       |      |  |  |  |
| T <sub>119</sub>                                       | K <sub>156</sub>                                                                                                          |        | 19.3±0.6                            | 22.3±1.2               | 56.5±1.1                |               |                                                     |      |      |       |       |      |  |  |  |
| K <sub>121</sub>                                       | K <sub>156</sub>                                                                                                          |        | 23.2±0.5                            | 28.0±1.0               | 50.3±0.9                |               |                                                     |      |      |       |       |      |  |  |  |
| T <sub>123</sub>                                       | K <sub>156</sub>                                                                                                          |        | 28.4±0.5                            | 32.2±1.1               | 45.5±0.9                |               |                                                     |      |      |       |       |      |  |  |  |
| T <sub>119</sub>                                       | K <sub>160</sub>                                                                                                          |        | 16.0±0.8                            | 13.2±0.6               | 54.6±0.7                |               |                                                     |      |      |       |       |      |  |  |  |
| K <sub>121</sub>                                       | K <sub>160</sub>                                                                                                          |        | 21.0±0.7                            | 19.5±0.6               | 48.6±0.6                |               |                                                     |      |      |       |       |      |  |  |  |
| T <sub>123</sub>                                       | K <sub>160</sub>                                                                                                          |        | 26.2±0.7                            | 23.8±0.6               | 43.8±0.6                |               |                                                     |      |      |       |       |      |  |  |  |
| T <sub>119</sub>                                       | K <sub>161</sub>                                                                                                          |        | 14.3±0.8                            | 12.5±0.7               | 53.3±0.5                |               |                                                     |      |      |       |       |      |  |  |  |
| K <sub>121</sub>                                       | K <sub>161</sub>                                                                                                          |        | 19.8±0.6                            | 19.0±0.6               | 47.5±0.5                |               |                                                     |      |      |       |       |      |  |  |  |
| T <sub>123</sub>                                       | K <sub>161</sub>                                                                                                          |        | 24.8±0.5                            | 23.3±0.6               | 42.7±0.5                |               |                                                     |      |      |       |       |      |  |  |  |
| K <sub>121</sub>                                       | Y <sub>153</sub>                                                                                                          |        | 18.7±0.5                            | 30.3±1.2               | 45.6±1.0                |               |                                                     |      |      |       |       |      |  |  |  |

Supplemental Table S2b, p.7

| Cross-linked peptides                                             |                                                        | Figure | Distances (Å) measured in structure |                        |                         | # of peptides | False Discovery Rate (FDR) of cross-linked peptides |      |      |       |       |      |
|-------------------------------------------------------------------|--------------------------------------------------------|--------|-------------------------------------|------------------------|-------------------------|---------------|-----------------------------------------------------|------|------|-------|-------|------|
| ISCU                                                              | ISCU                                                   |        | ISCU intra-monomer                  | ISCU-ISCU intra-trimer | ISCU-ISCU inter-trimers |               | ≤5 %                                                | ≤10% | ≤20% | ≤25 % | ≤35 % | ≤60% |
| PK <sub>160</sub> K <sub>161</sub> GE                             | ALT <sub>119</sub> IK <sub>121</sub> NT <sub>123</sub> |        |                                     |                        |                         | 1             |                                                     | 1    |      |       |       |      |
| K <sub>160</sub>                                                  | T <sub>119</sub>                                       |        | 16.0±0.8                            | 13.2±0.6               | 54.6±0.7                |               |                                                     |      |      |       |       |      |
| K <sub>160</sub>                                                  | K <sub>121</sub>                                       | 6G     | 21.0±0.7                            | 19.5±0.6               | 48.6±0.6                |               |                                                     |      |      |       |       |      |
| K <sub>160</sub>                                                  | T <sub>123</sub>                                       |        | 26.2±0.7                            | 23.8±0.6               | 43.8±0.6                |               |                                                     |      |      |       |       |      |
| K <sub>161</sub>                                                  | T <sub>119</sub>                                       |        | 14.3±0.8                            | 12.5±0.7               | 53.3±0.5                |               |                                                     |      |      |       |       |      |
| K <sub>161</sub>                                                  | K <sub>121</sub>                                       |        | 19.8±0.6                            | 19.0±0.6               | 47.5±0.5                |               |                                                     |      |      |       |       |      |
| K <sub>161</sub>                                                  | T <sub>123</sub>                                       |        | 24.8±0.5                            | 23.3±0.6               | 42.7±0.5                |               |                                                     |      |      |       |       |      |
|                                                                   |                                                        |        |                                     |                        |                         |               | ≤5 %                                                | ≤10% | ≤20% | ≤25 % | ≤35 % | ≤60% |
| AEK <sub>166</sub> K <sub>167</sub>                               | K <sub>82</sub> GK <sub>84</sub> IV                    |        |                                     |                        |                         | 1             |                                                     |      | 1    |       |       |      |
| K <sub>166</sub>                                                  | K <sub>82</sub>                                        | 6F     | 16.2±1.7                            | 15.4±1.5               | 58.2±0.7                |               |                                                     |      |      |       |       |      |
| K <sub>166</sub>                                                  | K <sub>82</sub>                                        |        | 18.1±1.7                            | 19.0±2.0               | 54.3±0.4                |               |                                                     |      |      |       |       |      |
| K <sub>167</sub>                                                  | K <sub>84</sub>                                        | 6G     | 17.2±1.1                            | 15.0±1.5               | 56.7±0.4                |               |                                                     |      |      |       |       |      |
| K <sub>167</sub>                                                  | K <sub>84</sub>                                        |        | 18.6±1.0                            | 18.0±1.8               | 52.5±0.7                |               |                                                     |      |      |       |       |      |
|                                                                   |                                                        |        |                                     |                        |                         |               | ≤5 %                                                | ≤10% | ≤20% | ≤25 % | ≤35 % | ≤60% |
| WVK <sub>110</sub> GK <sub>112</sub> TVEE                         | ALT <sub>119</sub> IK <sub>121</sub> NT <sub>123</sub> |        |                                     |                        |                         | 1             |                                                     |      | 1    |       |       |      |
| K <sub>110</sub>                                                  | T <sub>119</sub>                                       |        | 13.9 ± 0.5                          | 30.4 ± 0.7             | 45.8 ± 1.1              |               |                                                     |      |      |       |       |      |
| K <sub>110</sub>                                                  | K <sub>121</sub>                                       |        | 15.1 ± 0.3                          | 33.6 ± 0.6             | 39.4 ± 1.2              |               |                                                     |      |      |       |       |      |
| K <sub>110</sub>                                                  | T <sub>123</sub>                                       |        | 17.3 ± 0.2                          | 38.6 ± 0.6             | 35.8 ± 1.2              |               |                                                     |      |      |       |       |      |
| K <sub>112</sub>                                                  | T <sub>119</sub>                                       |        | 11.2 ± 0.2                          | 25.3 ± 0.7             | 46.8 ± 1.2              |               |                                                     |      |      |       |       |      |
| K <sub>112</sub>                                                  | K <sub>121</sub>                                       |        | 14.3 ± 0.5                          | 28.4 ± 0.6             | 40.4 ± 1.2              |               |                                                     |      |      |       |       |      |
| K <sub>112</sub>                                                  | T <sub>123</sub>                                       |        | 16.8 ± 0.6                          | 33.3 ± 0.7             | 36.8 ± 1.3              |               |                                                     |      |      |       |       |      |
|                                                                   |                                                        |        |                                     |                        |                         |               | ≤5 %                                                | ≤10% | ≤20% | ≤25 % | ≤35 % | ≤60% |
| n-MHK <sub>37</sub> K <sub>38</sub> VVDHYENPRNVGS <sub>51</sub> L | DVMK <sub>74</sub> LQIQV                               |        |                                     |                        |                         | 1             |                                                     |      |      | 1     |       |      |
| N-term                                                            | K <sub>74</sub>                                        |        | NM                                  | NM                     | NM                      |               |                                                     |      |      |       |       |      |
| K <sub>37</sub>                                                   | K <sub>74</sub>                                        |        | NM                                  | NM                     | NM                      |               |                                                     |      |      |       |       |      |
| K <sub>38</sub>                                                   | K <sub>74</sub>                                        |        | NM                                  | NM                     | NM                      |               |                                                     |      |      |       |       |      |
| S <sub>51</sub>                                                   | K <sub>74</sub>                                        | 6F     | 16.7±1.4                            | 34.8±1.5               | 49.0±1.4                |               |                                                     |      |      |       |       |      |
|                                                                   |                                                        |        |                                     |                        |                         |               | ≤5 %                                                | ≤10% | ≤20% | ≤25 % | ≤35 % | ≤60% |
| DAIK <sub>127</sub> E                                             | DAIK <sub>147</sub> AALA                               |        |                                     |                        |                         | 1             |                                                     |      |      | 1     |       |      |
| K <sub>127</sub>                                                  | K <sub>147</sub>                                       |        | 17.9±0.6                            | 35.3±1.3               | 30.0±0.8                |               |                                                     |      |      |       |       |      |
|                                                                   |                                                        |        |                                     |                        |                         |               | ≤5 %                                                | ≤10% | ≤20% | ≤25 % | ≤35 % | ≤60% |
| DAIK <sub>127</sub> E                                             | LCLPPVK <sub>135</sub> LHCS <sub>139</sub> MLAE        |        |                                     |                        |                         | 1             |                                                     |      | 1    |       |       |      |
| K <sub>127</sub>                                                  | K <sub>135</sub>                                       | 6H     | 12.0±0.7                            | 46.4±1.5               | 12.9±1.5                |               |                                                     |      |      |       |       |      |
| K <sub>127</sub>                                                  | S <sub>139</sub>                                       | 6H     | 11.2±1.1                            | 43.7±1.4               | 15.5±1.2                |               |                                                     |      |      |       |       |      |

Supplemental Table S2b, p.8

| Cross-linked peptides    |                                                         | Figure | Distances (Å) measured in structure |                        |                         | # of peptides | False Discovery Rate (FDR) of cross-linked peptides |      |      |       |       |      |
|--------------------------|---------------------------------------------------------|--------|-------------------------------------|------------------------|-------------------------|---------------|-----------------------------------------------------|------|------|-------|-------|------|
| ISCU                     | ISCU                                                    |        | ISCU intra-monomer                  | ISCU-ISCU intra-trimer | ISCU-ISCU inter-trimers |               | ≤5 %                                                | ≤10% | ≤20% | ≤25 % | ≤35 % | ≤60% |
| DAIK <sub>147</sub> AALA | DY <sub>153</sub> K <sub>154</sub> LK <sub>156</sub> QE |        |                                     |                        |                         | 1             |                                                     |      |      | 1     |       |      |
| K <sub>147</sub>         | Y <sub>153</sub>                                        |        | 9.9±0.1                             | 26.3±1.0               | 52.1±0.6                |               |                                                     |      |      |       |       |      |
| K <sub>147</sub>         | K <sub>154</sub>                                        |        | 10.4±0.2                            | 22.9±1.0               | 53.0±0.5                |               |                                                     |      |      |       |       |      |
| K <sub>147</sub>         | K <sub>156</sub>                                        |        | 14.6±0.1                            | 22.9±1.0               | 57.0±0.5                |               |                                                     |      |      |       |       |      |

Supplemental Table S2c, p.1

| Cross-linked peptides                               |                                                                                                                                                            | Distances (Å) measured in structure |            |            |            |            | # of peptides | False Discovery Rate (FDR) of cross-linked peptides |      |      |       |       |      |  |
|-----------------------------------------------------|------------------------------------------------------------------------------------------------------------------------------------------------------------|-------------------------------------|------------|------------|------------|------------|---------------|-----------------------------------------------------|------|------|-------|-------|------|--|
| NFS1                                                | NFS1                                                                                                                                                       | Figure                              | Monomer    | Dimer      | Trimer     | Tetramer   |               | ≤5 %                                                | ≤10% | ≤20% | ≤25 % | ≤35 % | ≤60% |  |
| <b>Single digestion GluC</b>                        |                                                                                                                                                            |                                     |            |            |            |            |               |                                                     |      |      |       |       |      |  |
| IGVK <sub>212</sub> QPIAE                           | Y <sub>317</sub> DHK <sub>320</sub> RIS <sub>323</sub> K <sub>324</sub> LSE                                                                                |                                     |            |            |            |            | 15            | 7                                                   | 2    | 2    |       |       |      |  |
| K <sub>212</sub>                                    | Y <sub>317</sub>                                                                                                                                           |                                     | 20.5 ± 1.0 | 74.3 ± 1.9 | 59.6 ± 2.3 | 40.0 ± 2.3 |               |                                                     |      |      |       |       |      |  |
| K <sub>212</sub>                                    | K <sub>320</sub>                                                                                                                                           | 7B                                  | 16.4 ± 0.9 | 71.2 ± 2.2 | 64.5 ± 2.3 | 43.9 ± 1.9 |               |                                                     |      |      |       |       |      |  |
| K <sub>212</sub>                                    | S <sub>323</sub>                                                                                                                                           |                                     | 12.8 ± 0.4 | 66.2 ± 2.2 | 67.5 ± 1.9 | 48.2 ± 1.5 |               |                                                     |      |      |       |       |      |  |
| K <sub>212</sub>                                    | K <sub>324</sub>                                                                                                                                           | 7B                                  | 16.0 ± 0.3 | 66.4 ± 2.3 | 66.4 ± 2.2 | 50.2 ± 1.8 |               |                                                     |      |      |       |       |      |  |
|                                                     |                                                                                                                                                            |                                     |            |            |            |            |               |                                                     |      |      |       |       |      |  |
| MS <sub>437</sub> PLWE                              | HK <sub>157</sub> CVLDS <sub>162</sub> CRS <sub>165</sub> LE                                                                                               |                                     |            |            |            |            | 2             | 1                                                   |      |      | 1     |       |      |  |
| S <sub>437</sub>                                    | K <sub>157</sub>                                                                                                                                           | 7C                                  | 40.2 ± 1.1 | 19.0 ± 0.9 | 55.5 ± 3.7 | 67.6 ± 1.2 |               |                                                     |      |      |       |       |      |  |
|                                                     |                                                                                                                                                            |                                     |            |            |            |            |               |                                                     |      |      |       |       |      |  |
| IGVK <sub>212</sub> QPIAE                           | K <sub>425</sub> CIQHVK <sub>431</sub> RLREMS <sub>437</sub> PLWE                                                                                          |                                     |            |            |            |            | 2             |                                                     | 1    |      |       |       | 1    |  |
| K <sub>212</sub>                                    | K <sub>425</sub>                                                                                                                                           | 7B                                  | 26.1 ± 0.8 | 49.5 ± 2.3 | 53.1 ± 2.3 | 66.1 ± 1.0 |               |                                                     |      |      |       |       |      |  |
| K <sub>212</sub>                                    | K <sub>431</sub>                                                                                                                                           |                                     | 33.1 ± 1.0 | 42.0 ± 1.6 | 48.9 ± 3.7 | 73.8 ± 3.5 |               |                                                     |      |      |       |       |      |  |
| K <sub>212</sub>                                    | S <sub>437</sub>                                                                                                                                           |                                     | 41.3 ± 0.8 | 31.7 ± 1.5 | 42.9 ± 3.4 | 76.3 ± 3.7 |               |                                                     |      |      |       |       |      |  |
|                                                     |                                                                                                                                                            |                                     |            |            |            |            |               |                                                     |      |      |       |       |      |  |
|                                                     |                                                                                                                                                            |                                     |            |            |            |            |               |                                                     |      |      |       |       |      |  |
| MS <sub>437</sub> PLWE                              | Y <sub>317</sub> DHK <sub>320</sub> RIS <sub>323</sub> K <sub>324</sub> LSE                                                                                |                                     |            |            |            |            | 2             | 2                                                   |      |      |       |       |      |  |
| S <sub>437</sub>                                    | K <sub>320</sub>                                                                                                                                           | 7D                                  | 44.8 ± 0.8 | 47.2 ± 1.4 | 27.7 ± 3.9 | 65.0 ± 2.9 |               |                                                     |      |      |       |       |      |  |
| S <sub>437</sub>                                    | K <sub>324</sub>                                                                                                                                           |                                     | 39.2 ± 0.9 | 44.0 ± 1.5 | 32.2 ± 3.9 | 69.3 ± 2.7 |               |                                                     |      |      |       |       |      |  |
|                                                     |                                                                                                                                                            |                                     |            |            |            |            |               |                                                     |      |      |       |       |      |  |
|                                                     |                                                                                                                                                            |                                     |            |            |            |            |               |                                                     |      |      |       |       |      |  |
| *S <sub>99</sub> EAAME                              | IGVK <sub>212</sub> QPIAE                                                                                                                                  |                                     |            |            |            |            | 2             | 1                                                   | 1    |      |       |       |      |  |
| S <sub>99</sub>                                     | K <sub>212</sub>                                                                                                                                           |                                     | 37.2 ± 1.2 | 80.0 ± 2.1 | 57.8 ± 3.0 | 30.5 ± 1.5 |               |                                                     |      |      |       |       |      |  |
|                                                     |                                                                                                                                                            |                                     |            |            |            |            |               |                                                     |      |      |       |       |      |  |
|                                                     |                                                                                                                                                            |                                     |            |            |            |            |               |                                                     |      |      |       |       |      |  |
| GFQVTYLPVQK <sub>180</sub> SGIIDLK <sub>187</sub> E | S <sub>365</sub> LLMALK <sub>371</sub> DVALS <sub>376</sub> S <sub>377</sub> GS <sub>379</sub> ACT <sub>382</sub><br>S <sub>383</sub> AS <sub>385</sub> LE |                                     |            |            |            |            | 1             |                                                     |      |      |       |       | 1    |  |
| K <sub>180</sub>                                    | S <sub>365</sub>                                                                                                                                           | 7C                                  | 22.2 ± 1.3 | 27.3 ± 1.6 | 64.1 ± 2.9 | 76.6 ± 2.7 |               |                                                     |      |      |       |       |      |  |
| K <sub>180</sub>                                    | K <sub>371</sub>                                                                                                                                           | 7B                                  | 21.5 ± 1.6 | 37.6 ± 2.0 | 64.3 ± 1.6 | 66.7 ± 2.8 |               |                                                     |      |      |       |       |      |  |
| K <sub>180</sub>                                    | S <sub>376</sub>                                                                                                                                           |                                     | 19.7 ± 1.4 | 42.3 ± 3.0 | 74.5 ± 2.0 | 64.2 ± 3.9 |               |                                                     |      |      |       |       |      |  |
| K <sub>180</sub>                                    | S <sub>377</sub>                                                                                                                                           | 14F                                 | 18.4 ± 1.9 | 39.7 ± 2.7 | 76.2 ± 2.6 | 61.0 ± 2.8 |               |                                                     |      |      |       |       |      |  |
| K <sub>180</sub>                                    | S <sub>379</sub>                                                                                                                                           | 14F                                 | 19.0 ± 1.4 | 38.4 ± 2.2 | 78.9 ± 2.9 | 56.9 ± 3.6 |               |                                                     |      |      |       |       |      |  |
| K <sub>180</sub>                                    | T <sub>382</sub>                                                                                                                                           |                                     | 24.7 ± 1.6 | 38.7 ± 2.9 | 77.7 ± 2.9 | 55.4 ± 2.2 |               |                                                     |      |      |       |       |      |  |
| K <sub>180</sub>                                    | S <sub>383</sub>                                                                                                                                           |                                     | 26.0 ± 1.2 | 40.9 ± 2.1 | 80.6 ± 2.6 | 51.6 ± 3.4 |               |                                                     |      |      |       |       |      |  |
| K <sub>180</sub>                                    | S <sub>385</sub>                                                                                                                                           |                                     | 26.9 ± 1.7 | 39.7 ± 1.4 | 85.6 ± 2.4 | 48.5 ± 3.9 |               |                                                     |      |      |       |       |      |  |
| K <sub>187</sub>                                    | S <sub>365</sub>                                                                                                                                           |                                     | 36.4 ± 1.5 | 37.4 ± 3.2 | 70.5 ± 3.7 | 72.3 ± 2.1 |               |                                                     |      |      |       |       |      |  |
| K <sub>187</sub>                                    | K <sub>371</sub>                                                                                                                                           |                                     | 35.5 ± 1.9 | 46.3 ± 2.2 | 72.2 ± 2.3 | 63.5 ± 2.4 |               |                                                     |      |      |       |       |      |  |
| K <sub>187</sub>                                    | S <sub>376</sub>                                                                                                                                           |                                     | 29.8 ± 1.0 | 53.6 ± 2.9 | 82.1 ± 2.5 | 60.4 ± 3.6 |               |                                                     |      |      |       |       |      |  |
| K <sub>187</sub>                                    | S <sub>377</sub>                                                                                                                                           |                                     | 28.4 ± 1.7 | 52.3 ± 3.6 | 83.3 ± 3.3 | 62.2 ± 3.0 |               |                                                     |      |      |       |       |      |  |
| K <sub>187</sub>                                    | S <sub>379</sub>                                                                                                                                           |                                     | 27.5 ± 0.8 | 51.1 ± 2.2 | 85.5 ± 3.2 | 59.7 ± 3.6 |               |                                                     |      |      |       |       |      |  |

Supplemental Table S2c, p.2

| Cross-linked peptides                                      |                  | Figure                                                                                                                        | Distances (Å) measured in structure |            |            |            | # of peptides | False Discovery Rate (FDR) of cross-linked peptides |      |      |       |       |      |  |
|------------------------------------------------------------|------------------|-------------------------------------------------------------------------------------------------------------------------------|-------------------------------------|------------|------------|------------|---------------|-----------------------------------------------------|------|------|-------|-------|------|--|
| NFS1                                                       | NFS1             |                                                                                                                               | Monomer                             | Dimer      | Trimer     | Tetramer   |               | ≤5 %                                                | ≤10% | ≤20% | ≤25 % | ≤35 % | ≤60% |  |
| K <sub>187</sub>                                           | T <sub>382</sub> |                                                                                                                               | 32.9 ± 1.4                          | 51.6 ± 2.6 | 83.8 ± 2.7 | 58.9 ± 3.1 |               |                                                     |      |      |       |       |      |  |
| K <sub>187</sub>                                           | S <sub>383</sub> |                                                                                                                               | 32.6 ± 1.1                          | 53.8 ± 1.9 | 86.7 ± 2.5 | 55.8 ± 2.8 |               |                                                     |      |      |       |       |      |  |
| K <sub>187</sub>                                           | S <sub>385</sub> |                                                                                                                               | 31.5 ± 1.6                          | 53.5 ± 1.0 | 90.7 ± 4.0 | 53.4 ± 3.7 |               |                                                     |      |      |       |       |      |  |
| <b>Double digestion GluC&amp;AspN</b>                      |                  |                                                                                                                               |                                     |            |            |            |               | ≤5 %                                                | ≤10% | ≤20% | ≤25 % | ≤35 % | ≤60% |  |
| DHK <sub>320</sub> RIS <sub>323</sub> K <sub>324</sub> LSE |                  | RLIQNIMK <sub>335</sub> S <sub>336</sub> LP                                                                                   |                                     |            |            |            | 4             | 1                                                   |      | 1    | 2     |       |      |  |
| K <sub>320</sub>                                           | K <sub>335</sub> | 7B                                                                                                                            | 23.3±0.3                            | 66.1±2.0   | 48.3±2.4   | 57.7±2.1   |               |                                                     |      |      |       |       |      |  |
| S <sub>323</sub>                                           | K <sub>335</sub> |                                                                                                                               | 18.8±0.5                            | 60.7±2.1   | 52.4±2.3   | 62.9±2.0   |               |                                                     |      |      |       |       |      |  |
| K <sub>324</sub>                                           | K <sub>335</sub> | 7B                                                                                                                            | 17.2±0.2                            | 61.5±2.1   | 50.7±2.5   | 64.0±2.2   |               |                                                     |      |      |       |       |      |  |
| K <sub>320</sub>                                           | S <sub>336</sub> |                                                                                                                               | 25.0±0.2                            | 64.5±2.0   | 45.6±2.5   | 59.7±2.1   |               |                                                     |      |      |       |       |      |  |
| K <sub>324</sub>                                           | S <sub>336</sub> |                                                                                                                               | 18.8±0.2                            | 60.2±2.1   | 47.0±2.4   | 65.5±2.1   |               |                                                     |      |      |       |       |      |  |
|                                                            |                  |                                                                                                                               |                                     |            |            |            |               | ≤5 %                                                | ≤10% | ≤20% | ≤25 % | ≤35 % | ≤60% |  |
| S <sub>99</sub> EAAME                                      |                  | MGSSHHHHHSSGLVPRGSHMLEVLR<br>PLYMDVQATT <sub>67</sub> PL                                                                      |                                     |            |            |            | 3             |                                                     |      | 3    |       |       |      |  |
| S <sub>99</sub>                                            | T <sub>67</sub>  |                                                                                                                               | 29.0±0.7                            | 64.2±2.9   | 39.4±2.6   | 24.4±2.9   |               |                                                     |      |      |       |       |      |  |
|                                                            |                  |                                                                                                                               |                                     |            |            |            |               | ≤5 %                                                | ≤10% | ≤20% | ≤25 % | ≤35 % | ≤60% |  |
| MEY <sub>317</sub>                                         |                  | DHK <sub>320</sub> RIS <sub>323</sub> K <sub>324</sub> LSE<br>RLIQNIMK <sub>335</sub> SLPD<br>VVMNG                           |                                     |            |            |            | 3             |                                                     | 1    | 1    | 1     |       |      |  |
| Y <sub>317</sub>                                           | K <sub>320</sub> |                                                                                                                               | 5.5±0.2                             | 85.6±1.0   | 58.3±2.1   | 56.1±1.9   |               |                                                     |      |      |       |       |      |  |
| Y <sub>317</sub>                                           | K <sub>324</sub> | 7B                                                                                                                            | 10.9±0.4                            | 81.7±1.5   | 53.1±2.0   | 54.7±1.8   |               |                                                     |      |      |       |       |      |  |
| Y <sub>317</sub>                                           | K <sub>335</sub> |                                                                                                                               | 27.9±0.4                            | 70.1±1.8   | 44.6±2.8   | 53.7±1.6   |               |                                                     |      |      |       |       |      |  |
|                                                            |                  |                                                                                                                               |                                     |            |            |            |               | ≤5 %                                                | ≤10% | ≤20% | ≤25 % | ≤35 % | ≤60% |  |
| DMK <sub>248</sub> I                                       |                  | IGRICS <sub>223</sub> S <sub>224</sub> RK <sub>226</sub> VY <sub>228</sub> FHT <sub>231</sub> DAAQAV<br>GK <sub>239</sub> IPL |                                     |            |            |            | 2             | 1                                                   | 1    |      |       |       |      |  |
| K <sub>248</sub>                                           | S <sub>223</sub> |                                                                                                                               | 6.6±0.4                             | 90.4±2.0   | 101.2±2.9  | 27.1±2.7   |               |                                                     |      |      |       |       |      |  |
| K <sub>248</sub>                                           | S <sub>224</sub> |                                                                                                                               | 10.0±0.4                            | 92.1±2.0   | 103.6±3.0  | 27.2±2.8   |               |                                                     |      |      |       |       |      |  |
| K <sub>248</sub>                                           | K <sub>226</sub> | 7B,E                                                                                                                          | 10.6±0.4                            | 91.2±1.9   | 103.2±3.0  | 22.0±2.7   |               |                                                     |      |      |       |       |      |  |
| K <sub>248</sub>                                           | Y <sub>228</sub> |                                                                                                                               | 8.9±0.3                             | 86.4±1.9   | 97.8±2.9   | 22.9±2.3   |               |                                                     |      |      |       |       |      |  |
| K <sub>248</sub>                                           | T <sub>231</sub> |                                                                                                                               | 9.9±0.2                             | 79.5±2.2   | 88.9±2.7   | 30.8±2.0   |               |                                                     |      |      |       |       |      |  |
| K <sub>248</sub>                                           | K <sub>239</sub> |                                                                                                                               | 19.6±1.0                            | 78.9±2.5   | 81.2±2.2   | 39.1±2.2   |               |                                                     |      |      |       |       |      |  |
|                                                            |                  |                                                                                                                               |                                     |            |            |            |               | ≤5 %                                                | ≤10% | ≤20% | ≤25 % | ≤35 % | ≤60% |  |
| S <sub>99</sub> EAAME                                      |                  | HK <sub>157</sub> CVL                                                                                                         |                                     |            |            |            | 1             | 1                                                   |      |      |       |       |      |  |
| S <sub>99</sub>                                            | K <sub>157</sub> | 7E                                                                                                                            | 39.5±1.1                            | 64.3±1.4   | 48.4±2.9   | 18.7±4.9   |               |                                                     |      |      |       |       |      |  |
|                                                            |                  |                                                                                                                               |                                     |            |            |            |               | ≤5 %                                                | ≤10% | ≤20% | ≤25 % | ≤35 % | ≤60% |  |
| DMK <sub>248</sub> I                                       |                  | DVVMNGDPK <sub>347</sub> HHY <sub>350</sub> PGCINLS <sub>357</sub> FA<br>Y <sub>360</sub> VE                                  |                                     |            |            |            | 1             | 1                                                   |      |      |       |       |      |  |
| K <sub>248</sub>                                           | K <sub>347</sub> | 7B                                                                                                                            | 22.9±0.4                            | 72.4±1.6   | 81.1±2.4   | 47.0±2.0   |               |                                                     |      |      |       |       |      |  |
| K <sub>248</sub>                                           | Y <sub>350</sub> |                                                                                                                               | 19.9±0.8                            | 72.1±1.5   | 79.2±2.4   | 44.2±1.6   |               |                                                     |      |      |       |       |      |  |
| K <sub>248</sub>                                           | S <sub>357</sub> |                                                                                                                               | 32.5±0.9                            | 58.0±2.3   | 68.3±3.1   | 51.3±4.4   |               |                                                     |      |      |       |       |      |  |
| K <sub>248</sub>                                           | Y <sub>360</sub> |                                                                                                                               | 40.6±0.8                            | 51.5±1.8   | 65.9±3.6   | 52.4±1.8   |               |                                                     |      |      |       |       |      |  |

Supplemental Table S2c, p.3

| Cross-linked peptides                                                                                 |                                                                                                                       | Figure | Distances (Å) measured in structure |          |          |          | # of peptides | False Discovery Rate (FDR) of cross-linked peptides |      |      |       |       |      |  |
|-------------------------------------------------------------------------------------------------------|-----------------------------------------------------------------------------------------------------------------------|--------|-------------------------------------|----------|----------|----------|---------------|-----------------------------------------------------|------|------|-------|-------|------|--|
| NFS1                                                                                                  | NFS1                                                                                                                  |        | Monomer                             | Dimer    | Trimer   | Tetramer |               | ≤5 %                                                | ≤10% | ≤20% | ≤25 % | ≤35 % | ≤60% |  |
| S <sub>365</sub> LLMALK <sub>371</sub>                                                                | DAAQAVGK <sub>239</sub> IPL                                                                                           |        |                                     |          |          |          | 1             | 1                                                   |      |      |       |       |      |  |
| S <sub>365</sub>                                                                                      | K <sub>239</sub>                                                                                                      |        | 32.5±1.6                            | 42.2±1.8 | 43.5±2.4 | 51.6±2.5 |               |                                                     |      |      |       |       |      |  |
| K <sub>371</sub>                                                                                      | K <sub>239</sub>                                                                                                      | 7B     | 23.8±1.6                            | 49.5±1.9 | 44.1±1.7 | 52.6±2.1 |               |                                                     |      |      |       |       |      |  |
|                                                                                                       |                                                                                                                       |        |                                     |          |          |          |               | ≤5 %                                                | ≤10% | ≤20% | ≤25 % | ≤35 % | ≤60% |  |
| S <sub>365</sub> LLMALK <sub>371</sub>                                                                | DLK <sub>450</sub> S <sub>451</sub> IK <sub>453</sub> WT <sub>455</sub> QH-c                                          |        |                                     |          |          |          | 1             | 1                                                   |      |      |       |       |      |  |
| S <sub>365</sub>                                                                                      | K <sub>450</sub>                                                                                                      |        | 27.3±2.2                            | 32.4±2.2 | 49.7±2.9 | 86.0±2.4 |               |                                                     |      |      |       |       |      |  |
| K <sub>371</sub>                                                                                      | K <sub>450</sub>                                                                                                      |        | 29.5±2.1                            | 30.3±3.8 | 40.6±3.6 | 75.7±1.8 |               |                                                     |      |      |       |       |      |  |
| S <sub>365</sub>                                                                                      | K <sub>453</sub>                                                                                                      |        | 26.8±2.6                            | 31.3±1.4 | 52.5±2.6 | 82.0±2.0 |               |                                                     |      |      |       |       |      |  |
| K <sub>371</sub>                                                                                      | K <sub>453</sub>                                                                                                      | 7B     | 27.7±2.3                            | 27.8±2.6 | 43.5±2.7 | 71.4±2.8 |               |                                                     |      |      |       |       |      |  |
| K <sub>371</sub>                                                                                      | S <sub>451</sub>                                                                                                      |        | 29.3±1.5                            | 29.3±3.0 | 42.4±2.9 | 75.0±2.7 |               |                                                     |      |      |       |       |      |  |
| K <sub>371</sub>                                                                                      | T <sub>455</sub>                                                                                                      | 7C     | 27.8±3.9                            | 25.3±3.2 | 48.0±2.7 | 70.0±3.7 |               |                                                     |      |      |       |       |      |  |
|                                                                                                       |                                                                                                                       |        |                                     |          |          |          |               | ≤5 %                                                | ≤10% | ≤20% | ≤25 % | ≤35 % | ≤60% |  |
| GFQVT <sub>174</sub> Y <sub>175</sub> LPVQK <sub>180</sub> S <sub>181</sub> GIIDLK <sub>187</sub> ELE | DHK <sub>320</sub> RIS <sub>323</sub> K <sub>324</sub> LS <sub>326</sub> ERLIQNIMK <sub>335</sub> S <sub>336</sub> LP |        |                                     |          |          |          | 1             | 1                                                   |      |      |       |       |      |  |
| K <sub>180</sub>                                                                                      | K <sub>320</sub>                                                                                                      |        | 25.3±1.5                            | 62.3±1.5 | 60.1±2.5 | 42.9±1.7 |               |                                                     |      |      |       |       |      |  |
| K <sub>180</sub>                                                                                      | S <sub>323</sub>                                                                                                      |        | 20.6±1.4                            | 58.0±3.0 | 64.9±2.2 | 47.8±1.6 |               |                                                     |      |      |       |       |      |  |
| K <sub>180</sub>                                                                                      | K <sub>324</sub>                                                                                                      | 7B     | 22.0±1.0                            | 57.1±1.6 | 63.1±2.5 | 48.9±1.8 |               |                                                     |      |      |       |       |      |  |
| K <sub>180</sub>                                                                                      | S <sub>326</sub>                                                                                                      |        | 18.3±1.0                            | 51.7±1.4 | 66.7±1.9 | 52.4±1.5 |               |                                                     |      |      |       |       |      |  |
| K <sub>180</sub>                                                                                      | K <sub>335</sub>                                                                                                      | 7B     | 16.3±1.0                            | 43.1±1.8 | 72.1±2.9 | 65.9±1.8 |               |                                                     |      |      |       |       |      |  |
| K <sub>180</sub>                                                                                      | S <sub>336</sub>                                                                                                      |        | 19.1±0.8                            | 41.1±1.8 | 68.8±3.1 | 67.4±1.6 |               |                                                     |      |      |       |       |      |  |
| K <sub>187</sub>                                                                                      | K <sub>320</sub>                                                                                                      |        | 31.6±1.2                            | 70.1±2.0 | 75.0±2.6 | 37.4±1.3 |               |                                                     |      |      |       |       |      |  |
| K <sub>187</sub>                                                                                      | S <sub>323</sub>                                                                                                      |        | 28.3±1.0                            | 65.8±2.3 | 79.4±2.4 | 42.1±1.1 |               |                                                     |      |      |       |       |      |  |
| K <sub>187</sub>                                                                                      | K <sub>324</sub>                                                                                                      |        | 30.6±0.9                            | 65.0±2.4 | 78.6±1.9 | 43.3±1.5 |               |                                                     |      |      |       |       |      |  |
| K <sub>187</sub>                                                                                      | S <sub>326</sub>                                                                                                      |        | 28.6±0.5                            | 60.6±2.3 | 81.1±2.0 | 47.2±1.1 |               |                                                     |      |      |       |       |      |  |
| K <sub>187</sub>                                                                                      | K <sub>335</sub>                                                                                                      |        | 29.7±0.8                            | 51.3±3.3 | 81.3±2.5 | 59.4±1.7 |               |                                                     |      |      |       |       |      |  |
| K <sub>187</sub>                                                                                      | S <sub>336</sub>                                                                                                      |        | 33.0±0.7                            | 47.8±2.7 | 77.0±2.9 | 61.5±1.6 |               |                                                     |      |      |       |       |      |  |
| T <sub>174</sub>                                                                                      | K <sub>320</sub>                                                                                                      | 7E     | 37.7±1.2                            | 62.7±2.8 | 75.3±3.0 | 24.7±1.5 |               |                                                     |      |      |       |       |      |  |
| Y <sub>175</sub>                                                                                      | K <sub>320</sub>                                                                                                      |        | 35.3±1.3                            | 61.7±3.5 | 71.9±2.4 | 27.0±1.7 |               |                                                     |      |      |       |       |      |  |
| S <sub>181</sub>                                                                                      | K <sub>320</sub>                                                                                                      |        | 22.4±1.5                            | 65.7±1.4 | 62.0±1.6 | 44.2±1.9 |               |                                                     |      |      |       |       |      |  |
| T <sub>174</sub>                                                                                      | K <sub>324</sub>                                                                                                      |        | 36.9±0.6                            | 57.3±2.7 | 79.4±2.2 | 31.0±1.7 |               |                                                     |      |      |       |       |      |  |
| Y <sub>175</sub>                                                                                      | K <sub>324</sub>                                                                                                      |        | 34.2±0.7                            | 55.4±2.4 | 75.1±2.9 | 33.0±1.7 |               |                                                     |      |      |       |       |      |  |
| S <sub>181</sub>                                                                                      | K <sub>324</sub>                                                                                                      |        | 19.3±1.0                            | 60.6±1.5 | 64.7±2.5 | 50.3±2.0 |               |                                                     |      |      |       |       |      |  |
| T <sub>174</sub>                                                                                      | K <sub>335</sub>                                                                                                      |        | 35.8±1.0                            | 44.6±2.7 | 84.7±2.9 | 47.6±1.7 |               |                                                     |      |      |       |       |      |  |
| Y <sub>175</sub>                                                                                      | K <sub>335</sub>                                                                                                      |        | 32.2±1.0                            | 42.7±2.5 | 83.0±2.4 | 50.1±1.8 |               |                                                     |      |      |       |       |      |  |
| S <sub>181</sub>                                                                                      | K <sub>335</sub>                                                                                                      |        | 16.6±1.0                            | 46.8±1.8 | 70.1±3.2 | 67.8±1.2 |               |                                                     |      |      |       |       |      |  |
|                                                                                                       |                                                                                                                       |        |                                     |          |          |          |               | ≤5 %                                                | ≤10% | ≤20% | ≤25 % | ≤35 % | ≤60% |  |
| S <sub>365</sub> LLMALK <sub>371</sub>                                                                | GFQVT <sub>174</sub> Y <sub>175</sub> LPVQK <sub>180</sub> S <sub>181</sub> GII                                       |        |                                     |          |          |          | 1             |                                                     | 1    |      |       |       |      |  |
| K <sub>371</sub>                                                                                      | T <sub>174</sub>                                                                                                      |        | 34.5±2.7                            | 36.7±2.2 | 74.3±1.4 | 50.3±2.2 |               |                                                     |      |      |       |       |      |  |
| K <sub>371</sub>                                                                                      | Y <sub>175</sub>                                                                                                      |        | 30.9±2.6                            | 35.2±2.5 | 71.8±1.4 | 51.8±2.4 |               |                                                     |      |      |       |       |      |  |



Supplemental Table S2c, p.4

| Cross-linked peptides                                                              |                                                                                    | Figure | Distances (Å) measured in structure |            |            |            | # of peptides | False Discovery Rate (FDR) of cross-linked peptides |      |      |       |       |      |  |
|------------------------------------------------------------------------------------|------------------------------------------------------------------------------------|--------|-------------------------------------|------------|------------|------------|---------------|-----------------------------------------------------|------|------|-------|-------|------|--|
| NFS1                                                                               | NFS1                                                                               |        | Monomer                             | Dimer      | Trimer     | Tetramer   |               | ≤5 %                                                | ≤10% | ≤20% | ≤25 % | ≤35 % | ≤60% |  |
| K <sub>371</sub>                                                                   | K <sub>180</sub>                                                                   |        | 21.5 ± 1.6                          | 37.6 ± 2.0 | 64.3 ± 1.6 | 66.7 ± 2.8 |               |                                                     |      |      |       |       |      |  |
| K <sub>371</sub>                                                                   | S <sub>181</sub>                                                                   |        | 22.6±1.4                            | 40.4±1.4   | 62.0±1.8   | 67.4±1.7   |               |                                                     |      |      |       |       |      |  |
| S <sub>365</sub>                                                                   | K <sub>180</sub>                                                                   |        | 22.2 ± 1.3                          | 27.3 ± 1.6 | 64.1 ± 2.9 | 76.6 ± 2.7 |               |                                                     |      |      |       |       |      |  |
|                                                                                    |                                                                                    |        |                                     |            |            |            |               | ≤5 %                                                | ≤10% | ≤20% | ≤25 % | ≤35 % | ≤60% |  |
| HK <sub>157</sub> CVL                                                              | S <sub>365</sub> LLMALK <sub>371</sub>                                             |        |                                     |            |            |            | 1             |                                                     |      | 1    |       |       |      |  |
| K <sub>157</sub>                                                                   | S <sub>365</sub>                                                                   | 7C     | 27.1±2.0                            | 23.7±2.6   | 66.0±2.6   | 59.5±2.9   |               |                                                     |      |      |       |       |      |  |
| K <sub>157</sub>                                                                   | K <sub>371</sub>                                                                   | 7B     | 23.8±2.8                            | 29.5±2.3   | 64.9±1.3   | 48.0±2.2   |               |                                                     |      |      |       |       |      |  |
|                                                                                    |                                                                                    |        |                                     |            |            |            |               | ≤5 %                                                | ≤10% | ≤20% | ≤25 % | ≤35 % | ≤60% |  |
| VLRPLY <sub>60</sub> MDVQATT <sub>67</sub> PL                                      | RLIQNIMK <sub>335</sub> S <sub>336</sub> LPDVVMNG                                  |        |                                     |            |            |            | 1             |                                                     |      | 1    |       |       |      |  |
| Y <sub>60</sub>                                                                    | K <sub>335</sub>                                                                   |        | NM                                  | NM         | NM         | NM         |               |                                                     |      |      |       |       |      |  |
| T <sub>67</sub>                                                                    | K <sub>335</sub>                                                                   |        | 26.9±1.0                            | 52.5±2.6   | 58.3±1.3   | 70.3±1.4   |               |                                                     |      |      |       |       |      |  |
|                                                                                    |                                                                                    |        |                                     |            |            |            |               | ≤5 %                                                | ≤10% | ≤20% | ≤25 % | ≤35 % | ≤60% |  |
| S <sub>365</sub> LLMALK <sub>371</sub>                                             | DVQAT <sub>66</sub> T <sub>67</sub> PL                                             |        |                                     |            |            |            | 1             |                                                     |      | 1    |       |       |      |  |
| K <sub>371</sub>                                                                   | T <sub>66</sub>                                                                    |        | NM                                  | NM         | NM         | NM         |               |                                                     |      |      |       |       |      |  |
| K <sub>371</sub>                                                                   | T <sub>67</sub>                                                                    |        | 14.3±1.3                            | 38.4±2.3   | 46.3±2.2   | 59.0±2.5   |               |                                                     |      |      |       |       |      |  |
|                                                                                    |                                                                                    |        |                                     |            |            |            |               | ≤5 %                                                | ≤10% | ≤20% | ≤25 % | ≤35 % | ≤60% |  |
| DLAHS <sub>404</sub> S <sub>405</sub> IRFGIGRFT <sub>414</sub> T <sub>415</sub> EE | YDHK <sub>320</sub> RISK <sub>324</sub> LSERLIQNIMK <sub>335</sub> SLP             |        |                                     |            |            |            | 1             |                                                     |      | 1    |       |       |      |  |
| S <sub>404</sub>                                                                   | K <sub>320</sub>                                                                   |        | 32.6±0.8                            | 50.2±1.7   | 48.5±2.6   | 42.8±2.1   |               |                                                     |      |      |       |       |      |  |
| S <sub>405</sub>                                                                   | K <sub>320</sub>                                                                   |        | 29.5±0.8                            | 53.5±1.9   | 50.9±1.7   | 41.9±1.4   |               |                                                     |      |      |       |       |      |  |
| T <sub>414</sub>                                                                   | K <sub>320</sub>                                                                   | 7B     | 12.7±0.5                            | 73.1±1.3   | 50.8±2.2   | 58.8±2.3   |               |                                                     |      |      |       |       |      |  |
| T <sub>415</sub>                                                                   | K <sub>320</sub>                                                                   |        | 12.4±0.5                            | 75.7±1.3   | 50.3±2.0   | 62.4±2.2   |               |                                                     |      |      |       |       |      |  |
| S <sub>404</sub>                                                                   | K <sub>324</sub>                                                                   |        | 28.6±0.8                            | 45.6±1.8   | 52.2±2.5   | 48.2±2.1   |               |                                                     |      |      |       |       |      |  |
| S <sub>405</sub>                                                                   | K <sub>324</sub>                                                                   |        | 25.8±0.8                            | 48.5±1.4   | 54.4±2.2   | 47.5±1.4   |               |                                                     |      |      |       |       |      |  |
| T <sub>414</sub>                                                                   | K <sub>324</sub>                                                                   |        | 10.4±0.4                            | 68.9±1.0   | 51.7±2.2   | 64.9±2.1   |               |                                                     |      |      |       |       |      |  |
| T <sub>415</sub>                                                                   | K <sub>324</sub>                                                                   | 7B     | 10.0±0.3                            | 71.6±0.9   | 51.0±1.7   | 66.6±1.3   |               |                                                     |      |      |       |       |      |  |
| S <sub>404</sub>                                                                   | K <sub>335</sub>                                                                   |        | 21.4±1.4                            | 34.6±2.3   | 66.5±1.7   | 64.6±1.9   |               |                                                     |      |      |       |       |      |  |
| S <sub>405</sub>                                                                   | K <sub>335</sub>                                                                   | 7B     | 19.7±1.4                            | 37.5±2.3   | 68.2±1.4   | 64.2±1.2   |               |                                                     |      |      |       |       |      |  |
| T <sub>414</sub>                                                                   | K <sub>335</sub>                                                                   |        | 19.7±0.7                            | 58.9±1.6   | 48.9±2.3   | 65.0±1.9   |               |                                                     |      |      |       |       |      |  |
| T <sub>415</sub>                                                                   | K <sub>335</sub>                                                                   |        | 20.3±0.5                            | 62.2±1.8   | 46.3±2.4   | 63.8±1.7   |               |                                                     |      |      |       |       |      |  |
|                                                                                    |                                                                                    |        |                                     |            |            |            |               | ≤5 %                                                | ≤10% | ≤20% | ≤25 % | ≤35 % | ≤60% |  |
| *S <sub>99</sub> EAAME                                                             | K <sub>425</sub> CIQHVK <sub>431</sub> RLRE                                        |        |                                     |            |            |            | 1             |                                                     |      | 1    |       |       |      |  |
| S <sub>99</sub>                                                                    | K <sub>425</sub>                                                                   |        | 46.6±1.4                            | 69.3±1.5   | 41.9±2.2   | 41.2±2.7   |               |                                                     |      |      |       |       |      |  |
| S <sub>99</sub>                                                                    | K <sub>431</sub>                                                                   |        | 56.0±1.4                            | 66.6±1.6   | 39.3±2.8   | 44.1±0.8   |               |                                                     |      |      |       |       |      |  |
|                                                                                    |                                                                                    |        |                                     |            |            |            |               | ≤5 %                                                | ≤10% | ≤20% | ≤25 % | ≤35 % | ≤60% |  |
| IGVK <sub>212</sub> QPIAE                                                          | DPK <sub>347</sub> HHY <sub>350</sub> PGCINLS <sub>357</sub> FAY <sub>360</sub> VE |        |                                     |            |            |            | 1             |                                                     |      |      | 1     |       |      |  |
| K <sub>212</sub>                                                                   | K <sub>347</sub>                                                                   |        | 9.6±0.3                             | 63.5±2.3   | 75.0±2.2   | 53.1±2.1   |               |                                                     |      |      |       |       |      |  |
| K <sub>212</sub>                                                                   | Y <sub>350</sub>                                                                   |        | 5.3±0.4                             | 61.0±1.9   | 73.0±2.2   | 50.0±1.7   |               |                                                     |      |      |       |       |      |  |
| K <sub>212</sub>                                                                   | S <sub>357</sub>                                                                   |        | 18.0±0.7                            | 45.8±1.9   | 65.3±2.8   | 57.3±2.4   |               |                                                     |      |      |       |       |      |  |
| K <sub>212</sub>                                                                   | Y <sub>360</sub>                                                                   |        | 26.7±0.6                            | 39.4±2.4   | 64.2±3.1   | 63.5±1.4   |               |                                                     |      |      |       |       |      |  |

Supplemental Table S2d, p.1

| Cross-linked peptides                 |                                                         |        | Distances (Å) measured in structure |               | False Discovery Rate (FDR) of cross-linked peptides |      |      |       |       |      |
|---------------------------------------|---------------------------------------------------------|--------|-------------------------------------|---------------|-----------------------------------------------------|------|------|-------|-------|------|
| ISD11                                 | ISD11                                                   | Figure | ISD11-ISD11                         | # of peptides | ≤5 %                                                | ≤10% | ≤20% | ≤25 % | ≤35 % | ≤60% |
| <b>Single digestion GluC</b>          |                                                         |        |                                     |               |                                                     |      |      |       |       |      |
| NRDMPRT <sub>91</sub> -C              | NK <sub>44</sub> NVK <sub>47</sub> DPVE                 | 7G     | 24.0 ± 0.8                          | 1             |                                                     |      |      |       | 1     |      |
| <b>Double digestion GluC&amp;AspN</b> |                                                         |        |                                     |               |                                                     |      |      |       |       |      |
| <b>ISD11</b>                          | <b>ISD11</b>                                            |        |                                     |               | ≤5 %                                                | ≤10% | ≤20% | ≤25 % | ≤35 % | ≤60% |
| DK <sub>80</sub> LIIE                 | IQT <sub>54</sub> LVNK <sub>58</sub> AK <sub>60</sub> R |        |                                     | 3             | 2                                                   |      | 1    |       |       |      |
| K <sub>80</sub>                       | T <sub>54</sub>                                         |        | 33.3±0.0                            |               |                                                     |      |      |       |       |      |
| K <sub>80</sub>                       | K <sub>58</sub>                                         | 7G     | 27.6±0.0                            |               |                                                     |      |      |       |       |      |
| K <sub>80</sub>                       | K <sub>60</sub>                                         | 7G     | 27.2±0.0                            |               |                                                     |      |      |       |       |      |
|                                       |                                                         |        |                                     |               | ≤5 %                                                | ≤10% | ≤20% | ≤25 % | ≤35 % | ≤60% |
| NK <sub>44</sub> NVK <sub>47</sub>    | n-MAQVLS <sub>11</sub> LY <sub>13</sub> RAMLRE          |        |                                     | 2             | 1                                                   |      |      | 1     |       |      |
| K <sub>44</sub>                       | N-term                                                  |        | 24.4±0.0                            |               |                                                     |      |      |       |       |      |
| K <sub>44</sub>                       | S <sub>11</sub>                                         |        | 24.5±0.0                            |               |                                                     |      |      |       |       |      |
| K <sub>44</sub>                       | Y <sub>13</sub>                                         | 7G     | 21.3±0.0                            |               |                                                     |      |      |       |       |      |
| K <sub>47</sub>                       | N-term                                                  |        | 29.2±0.0                            |               |                                                     |      |      |       |       |      |
| K <sub>47</sub>                       | S <sub>11</sub>                                         |        | 29.5±0.0                            |               |                                                     |      |      |       |       |      |
| K <sub>47</sub>                       | Y <sub>13</sub>                                         | 7G     | 26.5±0.0                            |               |                                                     |      |      |       |       |      |
|                                       |                                                         |        |                                     |               | ≤5 %                                                | ≤10% | ≤20% | ≤25 % | ≤35 % | ≤60% |
| NK <sub>44</sub> NVK <sub>47</sub>    | IQT <sub>54</sub> LVNK <sub>58</sub> AK <sub>60</sub> R |        |                                     | 1             |                                                     |      |      | 1     |       |      |
| K <sub>44</sub>                       | T <sub>54</sub>                                         |        | 11.4±0.0                            |               |                                                     |      |      |       |       |      |
| K <sub>44</sub>                       | K <sub>58</sub>                                         | 7G     | 13.7±0.0                            |               |                                                     |      |      |       |       |      |
| K <sub>44</sub>                       | K <sub>60</sub>                                         |        | 17.2±0.0                            |               |                                                     |      |      |       |       |      |
| K <sub>47</sub>                       | T <sub>54</sub>                                         |        | 11.2±0.0                            |               |                                                     |      |      |       |       |      |
| K <sub>47</sub>                       | K <sub>58</sub>                                         |        | 15.5±0.0                            |               |                                                     |      |      |       |       |      |
| K <sub>47</sub>                       | K <sub>60</sub>                                         | 7G     | 19.2±0.0                            |               |                                                     |      |      |       |       |      |

Supplemental Table S2e, p.1

| Cross-linked peptides                                                       |                                                                                                               | Figure | Distances (Å) measured in structure        |                                             |                                              | # of peptides | False Discovery Rate (FDR) of cross-linked peptides |      |      |       |       |      |
|-----------------------------------------------------------------------------|---------------------------------------------------------------------------------------------------------------|--------|--------------------------------------------|---------------------------------------------|----------------------------------------------|---------------|-----------------------------------------------------|------|------|-------|-------|------|
| FXN <sup>42-210</sup>                                                       | ISCU                                                                                                          |        | FXN <sup>42-210</sup> -ISCU<br>intra-dimer | FXN <sup>42-210</sup> -ISCU<br>intra-trimer | FXN <sup>42-210</sup> -ISCU<br>inter-trimers |               | ≤5 %                                                | ≤10% | ≤15% | ≤25 % | ≤41 % | ≤60% |
| <b>Single digestion GluC</b>                                                |                                                                                                               |        |                                            |                                             |                                              |               | ≤5 %                                                | ≤10% | ≤15% | ≤25 % | ≤41 % | ≤60% |
| T <sub>93</sub> T <sub>94</sub> Y <sub>95</sub> ERLAE                       | PK <sub>160</sub> K <sub>161</sub> GE                                                                         |        |                                            |                                             |                                              | 6             | 2                                                   |      | 1    |       | 3     |      |
| T <sub>93</sub>                                                             | K <sub>160</sub>                                                                                              |        | 32.1 ± 1.2                                 | 23.9 ± 1.5                                  | 44.8 ± 1.5                                   |               |                                                     |      |      |       |       |      |
| T <sub>94</sub>                                                             | K <sub>160</sub>                                                                                              |        | 32.6 ± 1.4                                 | 24.7 ± 1.4                                  | 45.2 ± 1.8                                   |               |                                                     |      |      |       |       |      |
| Y <sub>95</sub>                                                             | K <sub>160</sub>                                                                                              |        | 30.8 ± 1.6                                 | 23.5 ± 1.4                                  | 47.8 ± 1.7                                   |               |                                                     |      |      |       |       |      |
| T <sub>93</sub>                                                             | K <sub>161</sub>                                                                                              | 9A     | 28.8 ± 1.1                                 | 22.5 ± 1.4                                  | 43.2 ± 1.4                                   |               |                                                     |      |      |       |       |      |
| T <sub>94</sub>                                                             | K <sub>161</sub>                                                                                              |        | 29.2 ± 1.4                                 | 23.0 ± 1.4                                  | 43.3 ± 1.8                                   |               |                                                     |      |      |       |       |      |
| Y <sub>95</sub>                                                             | K <sub>161</sub>                                                                                              | 9A,B   | 27.3 ± 1.5                                 | 21.5 ± 1.3                                  | 45.7 ± 1.7                                   |               |                                                     |      |      |       |       |      |
|                                                                             |                                                                                                               |        |                                            |                                             |                                              |               | ≤5 %                                                | ≤10% | ≤15% | ≤25 % | ≤35 % | ≤60% |
| T <sub>93</sub> T <sub>94</sub> Y <sub>95</sub> ERLAE                       | AEK <sub>166</sub> K <sub>167</sub>                                                                           |        |                                            |                                             |                                              | 10            | 2                                                   |      | 1    | 2     | 2     | 3    |
| T <sub>93</sub>                                                             | K <sub>166</sub>                                                                                              |        | 30.1 ± 2.2                                 | 14.2 ± 1.5                                  | 34.8 ± 1.6                                   |               |                                                     |      |      |       |       |      |
| T <sub>94</sub>                                                             | K <sub>166</sub>                                                                                              |        | 29.5 ± 2.3                                 | 15.0 ± 1.6                                  | 34.7 ± 1.8                                   |               |                                                     |      |      |       |       |      |
| Y <sub>95</sub>                                                             | K <sub>166</sub>                                                                                              | 9A,B   | 26.9 ± 2.3                                 | 14.3 ± 1.4                                  | 37.2 ± 1.8                                   |               |                                                     |      |      |       |       |      |
| T <sub>93</sub>                                                             | K <sub>167</sub>                                                                                              |        | 33.4 ± 1.9                                 | 13.4 ± 2.0                                  | 33.8 ± 1.2                                   |               |                                                     |      |      |       |       |      |
| T <sub>94</sub>                                                             | K <sub>167</sub>                                                                                              |        | 32.8 ± 2.1                                 | 14.6 ± 1.8                                  | 34.8 ± 0.8                                   |               |                                                     |      |      |       |       |      |
| Y <sub>95</sub>                                                             | K <sub>167</sub>                                                                                              | 9B     | 30.3 ± 2.1                                 | 14.4 ± 2.0                                  | 37.5 ± 2.0                                   |               |                                                     |      |      |       |       |      |
|                                                                             |                                                                                                               |        |                                            |                                             |                                              |               | ≤5 %                                                | ≤10% | ≤15% | ≤25 % | ≤35 % | ≤60% |
| ET <sub>102</sub> LDS <sub>105</sub> LAE                                    | AEK <sub>166</sub> K <sub>167</sub>                                                                           |        |                                            |                                             |                                              | 1             | 1                                                   |      |      |       |       |      |
| T <sub>102</sub>                                                            | K <sub>166</sub>                                                                                              | 9A     | 24.2 ± 1.6                                 | 19.9 ± 1.6                                  | 44.5 ± 0.9                                   |               |                                                     |      |      |       |       |      |
| S <sub>105</sub>                                                            | K <sub>166</sub>                                                                                              |        | 27.8 ± 1.8                                 | 22.9 ± 1.7                                  | 44.4 ± 0.8                                   |               |                                                     |      |      |       |       |      |
| T <sub>102</sub>                                                            | K <sub>167</sub>                                                                                              | 9B     | 27.1 ± 1.8                                 | 20.1 ± 2.3                                  | 44.3 ± 0.8                                   |               |                                                     |      |      |       |       |      |
| S <sub>105</sub>                                                            | K <sub>167</sub>                                                                                              |        | 30.3 ± 1.8                                 | 22.6 ± 2.3                                  | 43.2 ± 0.9                                   |               |                                                     |      |      |       |       |      |
| <b>Double digestion GluC&amp;AspN</b>                                       |                                                                                                               |        |                                            |                                             |                                              |               | ≤5 %                                                | ≤10% | ≤20% | ≤25 % | ≤35 % | ≤60% |
| KGALELVFQGPGHMART <sub>44</sub>                                             | DHYENPRNVGSLDK <sub>54</sub> T <sub>55</sub> S <sub>56</sub> K <sub>57</sub> NV<br>GT <sub>61</sub> GLVGAPACG |        |                                            |                                             |                                              | 1             | 1                                                   |      |      |       |       |      |
| T <sub>44</sub>                                                             | K <sub>54</sub>                                                                                               |        | 31±1.0                                     | 23.7±1.7                                    | 68.5±1.3                                     |               |                                                     |      |      |       |       |      |
| T <sub>44</sub>                                                             | K <sub>57</sub>                                                                                               |        | 25.0±1.0                                   | 25.1±1.5                                    | 67.5±1.4                                     |               |                                                     |      |      |       |       |      |
|                                                                             |                                                                                                               |        |                                            |                                             |                                              |               | ≤5 %                                                | ≤10% | ≤20% | ≤25 % | ≤35 % | ≤60% |
| DWT <sub>169</sub> GK <sub>171</sub> NWVY <sub>175</sub> S <sub>176</sub> H | LCLPPVK <sub>135</sub> LHCS <sub>139</sub> MLAEDAIAK <sub>147</sub> A<br>ALA                                  |        |                                            |                                             |                                              | 1             |                                                     |      | 1    |       |       |      |
| T <sub>169</sub>                                                            | K <sub>135</sub>                                                                                              |        | 32.1±1.9                                   | 29.3±1.9                                    | 30.0±1.6                                     |               |                                                     |      |      |       |       |      |
| K <sub>171</sub>                                                            | K <sub>135</sub>                                                                                              |        | 32.6±1.2                                   | 25.8±1.4                                    | 26.9±0.7                                     |               |                                                     |      |      |       |       |      |
| Y <sub>175</sub>                                                            | K <sub>135</sub>                                                                                              | 9A,C   | 22.5±1.5                                   | 37.6±1.4                                    | 23.2±2.5                                     |               |                                                     |      |      |       |       |      |
| S <sub>176</sub>                                                            | K <sub>135</sub>                                                                                              |        | 24.1±1.3                                   | 37.7±1.2                                    | 25.0±2.9                                     |               |                                                     |      |      |       |       |      |
| T <sub>169</sub>                                                            | K <sub>147</sub>                                                                                              |        | 24.0±2.0                                   | 21.3±1.1                                    | 47.9±1.5                                     |               |                                                     |      |      |       |       |      |
| K <sub>171</sub>                                                            | K <sub>147</sub>                                                                                              | 9A,B   | 23.8±1.2                                   | 17.1±1.0                                    | 45.5±0.5                                     |               |                                                     |      |      |       |       |      |

Supplemental Table S2e, p.2

| Cross-linked peptides                                                       |                                                                             |        | Distances (Å) measured in structure        |                                             |                                              |               | False Discovery Rate (FDR) of cross-linked peptides |      |      |       |       |      |
|-----------------------------------------------------------------------------|-----------------------------------------------------------------------------|--------|--------------------------------------------|---------------------------------------------|----------------------------------------------|---------------|-----------------------------------------------------|------|------|-------|-------|------|
| FXN <sup>42-210</sup>                                                       | ISCU                                                                        | Figure | FXN <sup>42-210</sup> -ISCU<br>intra-dimer | FXN <sup>42-210</sup> -ISCU<br>intra-trimer | FXN <sup>42-210</sup> -ISCU<br>inter-trimers | # of peptides | ≤5 %                                                | ≤10% | ≤20% | ≤25 % | ≤35 % | ≤60% |
| Y <sub>175</sub>                                                            | K <sub>147</sub>                                                            | 9A     | 18.2±0.5                                   | 27.6±1.2                                    | 41.9±2.0                                     |               |                                                     |      |      |       |       |      |
| S <sub>176</sub>                                                            | K <sub>147</sub>                                                            |        | 18.5±1.6                                   | 28.4±1.0                                    | 43.4±2.0                                     |               |                                                     |      |      |       |       |      |
| K <sub>171</sub>                                                            | S <sub>139</sub>                                                            |        | 29.5±1.4                                   | 23.2±1.0                                    | 34.6±0.2                                     |               |                                                     |      |      |       |       |      |
|                                                                             |                                                                             |        |                                            |                                             |                                              |               | ≤5 %                                                | ≤10% | ≤20% | ≤25 % | ≤35 % | ≤60% |
| DGVS <sub>181</sub> LHE                                                     | DAIK <sub>147</sub> AALA                                                    |        |                                            |                                             |                                              | 1             |                                                     |      |      | 1     |       |      |
| S <sub>181</sub>                                                            | K <sub>147</sub>                                                            | 9A     | 18.8±0.5                                   | 25.3±1.1                                    | 40.8±1.8                                     |               |                                                     |      |      |       |       |      |
|                                                                             |                                                                             |        |                                            |                                             |                                              |               | ≤5 %                                                | ≤10% | ≤20% | ≤25 % | ≤35 % | ≤60% |
| DWT <sub>169</sub> GK <sub>171</sub> NWVY <sub>175</sub> S <sub>176</sub> H | DIAK <sub>127</sub> E                                                       |        |                                            |                                             |                                              | 1             |                                                     |      | 1    |       |       |      |
| T <sub>169</sub>                                                            | K <sub>127</sub>                                                            |        | 26.2±1.3                                   | 27.0±1.0                                    | 35.2±1.7                                     |               |                                                     |      |      |       |       |      |
| K <sub>171</sub>                                                            | K <sub>127</sub>                                                            |        | 24.9±1.3                                   | 25.0±0.9                                    | 32.0±1.1                                     |               |                                                     |      |      |       |       |      |
| Y <sub>175</sub>                                                            | K <sub>127</sub>                                                            | 9A     | 18.4±0.8                                   | 34.5±0.5                                    | 31.2±1.8                                     |               |                                                     |      |      |       |       |      |
| S <sub>176</sub>                                                            | K <sub>127</sub>                                                            |        | 21.3±0.7                                   | 30.8±0.6                                    | 32.2±2.0                                     |               |                                                     |      |      |       |       |      |
|                                                                             |                                                                             |        |                                            |                                             |                                              |               | ≤5 %                                                | ≤10% | ≤20% | ≤25 % | ≤35 % | ≤60% |
| T <sub>93</sub> T <sub>94</sub> Y <sub>95</sub> E                           | AEK <sub>166</sub> K <sub>167</sub>                                         |        |                                            |                                             |                                              | 1             |                                                     |      | 1    |       |       |      |
| T <sub>93</sub>                                                             | K <sub>166</sub>                                                            |        | 30.1 ± 2.2                                 | 14.2 ± 1.5                                  | 34.8 ± 1.6                                   |               |                                                     |      |      |       |       |      |
| T <sub>94</sub>                                                             | K <sub>166</sub>                                                            |        | 29.5 ± 2.3                                 | 15.0 ± 1.6                                  | 34.7 ± 1.8                                   |               |                                                     |      |      |       |       |      |
| Y <sub>95</sub>                                                             | K <sub>166</sub>                                                            | 9A,B   | 26.9 ± 2.3                                 | 14.3 ± 1.4                                  | 37.2 ± 1.8                                   |               |                                                     |      |      |       |       |      |
| T <sub>93</sub>                                                             | K <sub>167</sub>                                                            |        | 33.4 ± 1.9                                 | 13.4 ± 2.0                                  | 33.8 ± 1.2                                   |               |                                                     |      |      |       |       |      |
| T <sub>94</sub>                                                             | K <sub>167</sub>                                                            |        | 32.8 ± 2.1                                 | 14.6 ± 1.8                                  | 34.8 ± 0.8                                   |               |                                                     |      |      |       |       |      |
| Y <sub>95</sub>                                                             | K <sub>167</sub>                                                            | 9B     | 30.3 ± 2.1                                 | 14.4 ± 2.0                                  | 37.5 ± 2.0                                   |               |                                                     |      |      |       |       |      |
|                                                                             |                                                                             |        |                                            |                                             |                                              |               | ≤5 %                                                | ≤10% | ≤20% | ≤25 % | ≤35 % | ≤60% |
| LTK <sub>192</sub> ALK <sub>195</sub> TK <sub>197</sub> L                   | ALT <sub>119</sub> K <sub>121</sub> NT <sub>123</sub>                       |        |                                            |                                             |                                              | 1             |                                                     |      | 1    |       |       |      |
| K <sub>192</sub>                                                            | T <sub>119</sub>                                                            |        | 18.9±0.8                                   | 39.6±0.8                                    | 27.0±0.7                                     |               |                                                     |      |      |       |       |      |
| K <sub>192</sub>                                                            | K <sub>121</sub>                                                            | 9A     | 13.9±0.8                                   | 41.9±1.0                                    | 21.0±0.8                                     |               |                                                     |      |      |       |       |      |
| K <sub>192</sub>                                                            | T <sub>123</sub>                                                            | 9C     | 8.8±0.7                                    | 45.6±1.0                                    | 18.7±1.1                                     |               |                                                     |      |      |       |       |      |
| K <sub>195</sub>                                                            | T <sub>119</sub>                                                            |        | 23.0±0.7                                   | 43.1±0.8                                    | 27.3±0.8                                     |               |                                                     |      |      |       |       |      |
| K <sub>195</sub>                                                            | K <sub>121</sub>                                                            | 9A,C   | 18.2±0.6                                   | 45.0±1.0                                    | 21.6±0.9                                     |               |                                                     |      |      |       |       |      |
| K <sub>195</sub>                                                            | T <sub>123</sub>                                                            |        | 13.4±0.5                                   | 48.7±1.0                                    | 20.3±1.3                                     |               |                                                     |      |      |       |       |      |
| K <sub>197</sub>                                                            | T <sub>119</sub>                                                            |        | 20.2±1.0                                   | 38.1±1.1                                    | 33.7±0.8                                     |               |                                                     |      |      |       |       |      |
| K <sub>197</sub>                                                            | K <sub>121</sub>                                                            | 9A     | 17.1±0.7                                   | 39.6±1.0                                    | 27.9±0.9                                     |               |                                                     |      |      |       |       |      |
| K <sub>197</sub>                                                            | T <sub>123</sub>                                                            |        | 13.4±0.6                                   | 43.4±1.0                                    | 26.1±1.2                                     |               |                                                     |      |      |       |       |      |
| T <sub>191</sub>                                                            | K <sub>121</sub>                                                            |        | 14.6±0.6                                   | 39.3±1.0                                    | 24.2±1.0                                     |               |                                                     |      |      |       |       |      |
| T <sub>197</sub>                                                            | K <sub>121</sub>                                                            |        | 18.9±0.7                                   | 43.2±0.9                                    | 25.3±1.0                                     |               |                                                     |      |      |       |       |      |
|                                                                             |                                                                             |        |                                            |                                             |                                              |               | ≤5 %                                                | ≤10% | ≤20% | ≤25 % | ≤35 % | ≤60% |
| <b>LOW SCORE PEPTIDES</b>                                                   |                                                                             |        |                                            |                                             |                                              |               |                                                     |      |      |       |       |      |
| DYDVSGVSGVLTVK <sub>135</sub> LGG                                           | DK <sub>54</sub> TSK <sub>57</sub> NVGTGLVGPACGDVM<br>K <sub>74</sub> LQIQV |        |                                            |                                             |                                              | 1             |                                                     |      |      |       | 1     |      |
| K <sub>135</sub>                                                            | K <sub>54</sub>                                                             |        | 54.9±1.9                                   | 63.0±1.4                                    | 50.8±3.2                                     |               |                                                     |      |      |       |       |      |
| K <sub>135</sub>                                                            | K <sub>57</sub>                                                             |        | 50.2±1.8                                   | 55.1±1.7                                    | 42.5±3.6                                     |               |                                                     |      |      |       |       |      |
| K <sub>135</sub>                                                            | K <sub>74</sub>                                                             | 9C     | 42.1±1.8                                   | 53.0±1.8                                    | 30.1±1.5                                     |               |                                                     |      |      |       |       |      |

Supplemental Table S2e, p.3

| Cross-linked peptides                                                                         |                                        | Figure | Distances (Å) measured in structure        |                                             |                                              | # of peptides | False Discovery Rate (FDR) of cross-linked peptides |      |      |       |       |      |
|-----------------------------------------------------------------------------------------------|----------------------------------------|--------|--------------------------------------------|---------------------------------------------|----------------------------------------------|---------------|-----------------------------------------------------|------|------|-------|-------|------|
| FXN <sup>42-210</sup>                                                                         | ISCU                                   |        | FXN <sup>42-210</sup> -ISCU<br>intra-dimer | FXN <sup>42-210</sup> -ISCU<br>intra-trimer | FXN <sup>42-210</sup> -ISCU<br>inter-trimers |               | ≤5 %                                                | ≤10% | ≤20% | ≤25 % | ≤35 % | ≤60% |
| DVSFGSGVLTVK <sub>135</sub> LGG                                                               | AEK <sub>166</sub> K <sub>167</sub> -C |        |                                            |                                             |                                              | 3             |                                                     |      |      |       |       | 3    |
| K <sub>135</sub>                                                                              | K <sub>166</sub>                       |        | 32.9±1.3                                   | 38.3±2.0                                    | 20.5±0.8                                     |               |                                                     |      |      |       |       |      |
| K <sub>135</sub>                                                                              | K <sub>167</sub>                       | 9C     | 33.0±1.3                                   | 39.0±1.6                                    | 22.8±2.7                                     |               |                                                     |      |      |       |       |      |
| DVSFGSGVLTVK <sub>135</sub> LGG                                                               | PK <sub>160</sub> K <sub>161</sub> GE  |        |                                            |                                             |                                              | 1             | ≤5 %                                                | ≤10% | ≤20% | ≤25 % | ≤35 % | ≤60% |
| K <sub>135</sub>                                                                              | K <sub>160</sub>                       |        | 43.7±1.6                                   | 40.1±1.5                                    | 32.0±2.3                                     |               |                                                     |      |      |       |       | 1    |
| K <sub>135</sub>                                                                              | K <sub>161</sub>                       | 9C     | 41.1±1.5                                   | 38.5±1.4                                    | 30.7±2.7                                     |               |                                                     |      |      |       |       |      |
| DATCTPRRASSNQRGLNLIWNVK <sub>69</sub> K <sub>70</sub> Q<br>SVYLMNLRK <sub>80</sub> SGTLGHPGSL | AEK <sub>166</sub> K <sub>167</sub> -C |        |                                            |                                             |                                              | 2             | ≤5 %                                                | ≤10% | ≤20% | ≤25 % | ≤35 % | ≤40% |
| T <sub>49</sub>                                                                               | K <sub>166</sub>                       |        | 21.8±2.9                                   | 29.7±1.6                                    | 51.7±2.1                                     |               |                                                     |      |      |       |       |      |
| T <sub>51</sub>                                                                               | K <sub>166</sub>                       |        | 21.7±3.5                                   | 33.0±2.3                                    | 48.8±2.8                                     |               |                                                     |      |      |       |       |      |
| S <sub>56</sub>                                                                               | K <sub>166</sub>                       |        | 22.7±2.4                                   | 34.6±2.2                                    | 53.2±3.3                                     |               |                                                     |      |      |       |       |      |
| S <sub>57</sub>                                                                               | K <sub>166</sub>                       |        | 19.5±2.2                                   | 31.7±2.2                                    | 53.0±3.5                                     |               |                                                     |      |      |       |       |      |
| K <sub>69</sub>                                                                               | K <sub>166</sub>                       | 9A     | 23.8±0.9                                   | 28.7±1.5                                    | 65.6±0.9                                     |               |                                                     |      |      |       |       |      |
| K <sub>70</sub>                                                                               | K <sub>166</sub>                       |        | 25.9±1.0                                   | 28.6±1.8                                    | 68.9±0.9                                     |               |                                                     |      |      |       |       |      |
| S <sub>72</sub>                                                                               | K <sub>166</sub>                       |        | 25.3±1.0                                   | 25.5±1.8                                    | 67.6±0.4                                     |               |                                                     |      |      |       |       |      |
| K <sub>80</sub>                                                                               | K <sub>166</sub>                       | 9B     | 26.1±1.9                                   | 19.1±2.7                                    | 56.5±1.0                                     |               |                                                     |      |      |       |       |      |
| S <sub>81</sub>                                                                               | K <sub>166</sub>                       |        | 25.4±2.2                                   | 16.6±2.7                                    | 53.8±0.4                                     |               |                                                     |      |      |       |       |      |
| T <sub>83</sub>                                                                               | K <sub>166</sub>                       |        | 21.0±2.4                                   | 11.4±2.6                                    | 52.3±2.1                                     |               |                                                     |      |      |       |       |      |
| T <sub>49</sub>                                                                               | K <sub>167</sub>                       | 9A     | 19.1±2.1                                   | 31.4±1.1                                    | 51.3±2.0                                     |               |                                                     |      |      |       |       |      |
| T <sub>51</sub>                                                                               | K <sub>167</sub>                       |        | 18.5±3.0                                   | 35.0±1.7                                    | 47.9±2.6                                     |               |                                                     |      |      |       |       |      |
| S <sub>56</sub>                                                                               | K <sub>167</sub>                       |        | 19.4±2.4                                   | 36.4±1.2                                    | 51.8±3.2                                     |               |                                                     |      |      |       |       |      |
| S <sub>57</sub>                                                                               | K <sub>167</sub>                       | 9A     | 16.3±2.4                                   | 33.5±1.3                                    | 51.6±3.5                                     |               |                                                     |      |      |       |       |      |
| K <sub>69</sub>                                                                               | K <sub>167</sub>                       |        | 22.8±1.3                                   | 28.6±1.6                                    | 63.8±1.2                                     |               |                                                     |      |      |       |       |      |
| K <sub>70</sub>                                                                               | K <sub>167</sub>                       | 9A     | 25.2±1.4                                   | 28.9±1.4                                    | 67.4±1.2                                     |               |                                                     |      |      |       |       |      |
| S <sub>72</sub>                                                                               | K <sub>167</sub>                       |        | 25.2±1.0                                   | 25.0±2.2                                    | 65.8±0.9                                     |               |                                                     |      |      |       |       |      |
| K <sub>80</sub>                                                                               | K <sub>167</sub>                       |        | 27.4±1.2                                   | 16.6±2.7                                    | 55.5±1.3                                     |               |                                                     |      |      |       |       |      |
| S <sub>81</sub>                                                                               | K <sub>167</sub>                       |        | 27.1±1.7                                   | 14.0±2.7                                    | 52.7±1.0                                     |               |                                                     |      |      |       |       |      |
| T <sub>83</sub>                                                                               | K <sub>167</sub>                       |        | 23.1±2.3                                   | 9.2±2.2                                     | 51.1±1.5                                     |               |                                                     |      |      |       |       |      |

Supplemental Table S2f, p.1

| Cross-linked peptides                                                                 |                                                                                                                                                                                            |        | Distances (Å) measured in structure |            |            |            |            |            | # of peptides | False Discovery Rate (FDR) of cross-linked peptides |      |      |       |       |      |
|---------------------------------------------------------------------------------------|--------------------------------------------------------------------------------------------------------------------------------------------------------------------------------------------|--------|-------------------------------------|------------|------------|------------|------------|------------|---------------|-----------------------------------------------------|------|------|-------|-------|------|
| FXN <sup>42-210</sup>                                                                 | NFS1                                                                                                                                                                                       | Figure | 2-fold #1                           | 2-fold #2  | 2-fold #3  | 3-fold     | 4-fold     | C-term     |               | ≤5 %                                                | ≤10% | ≤20% | ≤25 % | ≤35 % | ≤60% |
| <b>Single digestion GluC</b>                                                          |                                                                                                                                                                                            |        |                                     |            |            |            |            |            |               |                                                     |      |      |       |       |      |
| *ET <sub>102</sub> LDS <sub>105</sub> LAE                                             | IGVK <sub>212</sub> QPIAE                                                                                                                                                                  |        |                                     |            |            |            |            |            | 3             | 1                                                   |      |      |       | 2     |      |
| T <sub>102</sub>                                                                      | K <sub>212</sub>                                                                                                                                                                           |        | 42.2 ± 1.5                          | 67.2 ± 1.6 | 67.5 ± 0.7 | 52.1 ± 2.8 | 60.3 ± 2.1 | 57.9 ± 1.5 |               |                                                     |      |      |       |       |      |
| S <sub>105</sub>                                                                      | K <sub>212</sub>                                                                                                                                                                           | 9D     | 39.3 ± 1.1                          | 70.9 ± 1.7 | 68.7 ± 0.8 | 49.1 ± 3.3 | 56.2 ± 2.1 | 60.4 ± 1.4 |               |                                                     |      |      |       |       |      |
|                                                                                       |                                                                                                                                                                                            |        |                                     |            |            |            |            |            |               | ≤5 %                                                | ≤10% | ≤20% | ≤25 % | ≤35 % | ≤60% |
| T <sub>93</sub> T <sub>94</sub> Y <sub>95</sub> ERLAE                                 | K <sub>425</sub> CIQHVK <sub>431</sub> RLREMS <sub>437</sub> PLWE                                                                                                                          |        |                                     |            |            |            |            |            | 2             |                                                     |      |      | 2     |       |      |
| T <sub>93</sub>                                                                       | K <sub>425</sub>                                                                                                                                                                           | 9D     | 47.1 ± 1.8                          | 54.2 ± 2.0 | 76.2 ± 1.2 | 44.6 ± 2.5 | 87.0 ± 1.9 | 30.1 ± 0.9 |               |                                                     |      |      |       |       |      |
| T <sub>94</sub>                                                                       | K <sub>425</sub>                                                                                                                                                                           |        | 47.4 ± 1.7                          | 55.2 ± 1.9 | 74.4 ± 1.2 | 46.1 ± 2.5 | 84.3 ± 1.9 | 34.0 ± 0.9 |               |                                                     |      |      |       |       |      |
| Y <sub>95</sub>                                                                       | K <sub>425</sub>                                                                                                                                                                           |        | 45.8 ± 1.7                          | 54.4 ± 2.2 | 71.8 ± 1.4 | 49.1 ± 2.2 | 82.0 ± 1.7 | 35.9 ± 0.8 |               |                                                     |      |      |       |       |      |
| T <sub>93</sub>                                                                       | K <sub>431</sub>                                                                                                                                                                           |        | 55.7 ± 1.5                          | 56.7 ± 2.4 | 75.4 ± 1.2 | 46.8 ± 3.0 | 95.6 ± 1.8 | 32.6 ± 0.9 |               |                                                     |      |      |       |       |      |
| T <sub>94</sub>                                                                       | K <sub>431</sub>                                                                                                                                                                           |        | 55.8 ± 1.5                          | 59.9 ± 2.8 | 74.0 ± 1.1 | 49.9 ± 2.2 | 92.8 ± 1.9 | 36.5 ± 1.0 |               |                                                     |      |      |       |       |      |
| Y <sub>95</sub>                                                                       | K <sub>431</sub>                                                                                                                                                                           |        | 54.3 ± 1.8                          | 58.2 ± 2.6 | 71.6 ± 1.5 | 52.9 ± 2.0 | 90.5 ± 1.6 | 38.6 ± 1.0 |               |                                                     |      |      |       |       |      |
|                                                                                       |                                                                                                                                                                                            |        |                                     |            |            |            |            |            |               | ≤5 %                                                | ≤10% | ≤20% | ≤25 % | ≤35 % | ≤60% |
| DLADK <sub>116</sub> PY <sub>118</sub> T <sub>119</sub> FE                            | SNNIAIK <sub>136</sub> GVARFYRSRK <sub>146</sub> K <sub>147</sub> HLIT <sub>151</sub> T <sub>152</sub> Q<br>T <sub>154</sub> EHK <sub>157</sub> CVLDS <sub>162</sub> CRS <sub>165</sub> LE |        |                                     |            |            |            |            |            | 1             |                                                     |      |      | 1     |       |      |
| K <sub>116</sub>                                                                      | K <sub>136</sub>                                                                                                                                                                           | 9D,F   | 21.3 ± 1.2                          | 85.1 ± 1.0 | 65.2 ± 1.2 | 33.6 ± 4.6 | 36.9 ± 2.5 | 78.8 ± 0.9 |               |                                                     |      |      |       |       |      |
| K <sub>116</sub>                                                                      | K <sub>146</sub>                                                                                                                                                                           |        | 35.4 ± 1.2                          | 98.7 ± 1.3 | 76.0 ± 1.0 | 41.9 ± 5.5 | 48.3 ± 2.0 | 91.0 ± 1.1 |               |                                                     |      |      |       |       |      |
| K <sub>116</sub>                                                                      | K <sub>147</sub>                                                                                                                                                                           |        | 33.2 ± 1.7                          | 96.9 ± 1.2 | 72.4 ± 1.1 | 40.9 ± 5.5 | 47.7 ± 2.2 | 87.4 ± 1.1 |               |                                                     |      |      |       |       |      |
| K <sub>116</sub>                                                                      | T <sub>151</sub>                                                                                                                                                                           |        | 27.5 ± 1.3                          | 88.2 ± 1.2 | 64.6 ± 1.0 | 42.7 ± 5.5 | 43.4 ± 2.1 | 78.0 ± 1.0 |               |                                                     |      |      |       |       |      |
| K <sub>116</sub>                                                                      | T <sub>152</sub>                                                                                                                                                                           |        | 27.9 ± 1.2                          | 86.8 ± 1.3 | 62.9 ± 1.0 | 44.9 ± 5.5 | 43.8 ± 2.1 | 75.8 ± 1.0 |               |                                                     |      |      |       |       |      |
| K <sub>116</sub>                                                                      | T <sub>154</sub>                                                                                                                                                                           |        | 25.9 ± 1.2                          | 82.9 ± 1.4 | 58.1 ± 1.1 | 46.0 ± 4.9 | 42.8 ± 2.4 | 70.4 ± 1.0 |               |                                                     |      |      |       |       |      |
| K <sub>116</sub>                                                                      | K <sub>157</sub>                                                                                                                                                                           | 9D     | 21.0 ± 1.4                          | 81.1 ± 1.4 | 52.7 ± 0.9 | 39.4 ± 5.0 | 41.4 ± 3.3 | 66.1 ± 0.9 |               |                                                     |      |      |       |       |      |
| K <sub>116</sub>                                                                      | S <sub>162</sub>                                                                                                                                                                           |        | 21.1 ± 1.8                          | 85.2 ± 1.4 | 58.0 ± 1.3 | 33.1 ± 4.5 | 41.8 ± 2.3 | 72.1 ± 1.1 |               |                                                     |      |      |       |       |      |
| K <sub>116</sub>                                                                      | S <sub>165</sub>                                                                                                                                                                           |        | 25.4 ± 1.9                          | 90.1 ± 1.5 | 59.6 ± 1.4 | 35.1 ± 3.7 | 46.2 ± 2.1 | 75.0 ± 1.1 |               |                                                     |      |      |       |       |      |
| Y <sub>118</sub>                                                                      | K <sub>136</sub>                                                                                                                                                                           |        | 19.5 ± 1.0                          | 82.5 ± 1.2 | 61.3 ± 1.1 | 35.6 ± 4.8 | 38.2 ± 2.8 | 83.1 ± 0.7 |               |                                                     |      |      |       |       |      |
| Y <sub>118</sub>                                                                      | K <sub>146</sub>                                                                                                                                                                           |        | 33.6 ± 0.9                          | 96.0 ± 1.5 | 72.2 ± 0.9 | 43.5 ± 5.4 | 49.9 ± 2.5 | 95.4 ± 0.7 |               |                                                     |      |      |       |       |      |
| Y <sub>118</sub>                                                                      | K <sub>147</sub>                                                                                                                                                                           |        | 30.7 ± 1.1                          | 94.4 ± 1.3 | 68.7 ± 1.0 | 42.7 ± 5.3 | 49.2 ± 2.5 | 91.8 ± 0.7 |               |                                                     |      |      |       |       |      |
| Y <sub>118</sub>                                                                      | K <sub>157</sub>                                                                                                                                                                           |        | 16.8 ± 1.7                          | 79.4 ± 1.5 | 48.5 ± 0.9 | 42.3 ± 5.0 | 41.2 ± 3.4 | 70.4 ± 0.6 |               |                                                     |      |      |       |       |      |
| T <sub>119</sub>                                                                      | K <sub>136</sub>                                                                                                                                                                           |        | 21.9 ± 1.1                          | 80.6 ± 1.3 | 59.8 ± 1.2 | 37.8 ± 4.5 | 39.3 ± 2.5 | 83.3 ± 1.4 |               |                                                     |      |      |       |       |      |
| T <sub>119</sub>                                                                      | K <sub>146</sub>                                                                                                                                                                           |        | 36.1 ± 1.3                          | 94.1 ± 1.6 | 71.2 ± 1.0 | 46.4 ± 5.1 | 51.5 ± 2.1 | 95.8 ± 1.6 |               |                                                     |      |      |       |       |      |
| T <sub>119</sub>                                                                      | K <sub>147</sub>                                                                                                                                                                           |        | 33.4 ± 1.5                          | 92.5 ± 1.4 | 67.6 ± 0.9 | 45.4 ± 4.9 | 50.5 ± 2.0 | 92.3 ± 1.5 |               |                                                     |      |      |       |       |      |
| T <sub>119</sub>                                                                      | K <sub>157</sub>                                                                                                                                                                           |        | 18.4 ± 1.3                          | 77.6 ± 1.5 | 47.2 ± 0.9 | 43.5 ± 4.7 | 41.2 ± 3.2 | 71.0 ± 1.4 |               |                                                     |      |      |       |       |      |
|                                                                                       |                                                                                                                                                                                            |        |                                     |            |            |            |            |            |               | ≤5 %                                                | ≤10% | ≤20% | ≤25 % | ≤35 % | ≤60% |
| LTK <sub>192</sub> ALK <sub>195</sub> TK <sub>197</sub> LDLSSLAYSGK <sub>208</sub> DA | S <sub>99</sub> EAAAME                                                                                                                                                                     |        |                                     |            |            |            |            |            | 1             |                                                     |      | 1    |       |       |      |
| K <sub>192</sub>                                                                      | S <sub>99</sub>                                                                                                                                                                            |        | 33.7 ± 1.6                          | 31.9 ± 2.6 | 52.4 ± 2.0 | 55.4 ± 1.4 | 15.7 ± 3.5 | 65.6 ± 1.4 |               |                                                     |      |      |       |       |      |
| K <sub>195</sub>                                                                      | S <sub>99</sub>                                                                                                                                                                            |        | 34.2 ± 2.0                          | 36.0 ± 2.6 | 55.2 ± 2.2 | 54.7 ± 1.8 | 13.9 ± 4.1 | 70.3 ± 1.4 |               |                                                     |      |      |       |       |      |
| K <sub>197</sub>                                                                      | S <sub>99</sub>                                                                                                                                                                            |        | 28.7 ± 2.3                          | 38.9 ± 2.7 | 60.3 ± 1.9 | 51.4 ± 2.8 | 15.8 ± 3.0 | 67.0 ± 1.9 |               |                                                     |      |      |       |       |      |
| K <sub>208</sub>                                                                      | S <sub>99</sub>                                                                                                                                                                            | 9D     | 20.9 ± 1.4                          | 41.7 ± 1.8 | 67.2 ± 1.8 | 49.7 ± 3.0 | 25.5 ± 1.9 | 54.9 ± 1.3 |               |                                                     |      |      |       |       |      |

Supplemental Table S2f, p.2

| Cross-linked peptides                                                                 |                                                                                                                                                              | Distances (Å) measured in structure |            |            |            |            |            |            | # of peptides | False Discovery Rate (FDR) of cross-linked peptides |      |      |       |       |      |
|---------------------------------------------------------------------------------------|--------------------------------------------------------------------------------------------------------------------------------------------------------------|-------------------------------------|------------|------------|------------|------------|------------|------------|---------------|-----------------------------------------------------|------|------|-------|-------|------|
| FXN <sup>42-210</sup>                                                                 | NFS1                                                                                                                                                         | Figure                              | 2-fold #1  | 2-fold #2  | 2-fold #3  | 3-fold     | 4-fold     | C-term     |               | ≤5 %                                                | ≤10% | ≤20% | ≤25 % | ≤35 % | ≤60% |
| LTK <sub>192</sub> ALK <sub>195</sub> TK <sub>197</sub> LDLSSLAYSGK <sub>208</sub> DA | GES <sub>365</sub> LLMALK <sub>371</sub> DVALS <sub>376</sub> S <sub>377</sub> GS <sub>379</sub> ACT <sub>382</sub><br>S <sub>383</sub> AS <sub>385</sub> LE |                                     |            |            |            |            |            |            | 1             |                                                     |      | 1    |       |       |      |
| K <sub>192</sub>                                                                      | S <sub>365</sub>                                                                                                                                             |                                     | 27.9 ± 2.3 | 69.5 ± 2.0 | 29.9 ± 2.9 | 70.2 ± 4.9 | 64.8 ± 1.4 | 59.3 ± 0.9 |               |                                                     |      |      |       |       |      |
| K <sub>195</sub>                                                                      | S <sub>365</sub>                                                                                                                                             |                                     | 27.3 ± 2.5 | 73.9 ± 1.9 | 27.6 ± 2.3 | 71.4 ± 5.0 | 62.0 ± 1.8 | 60.7 ± 0.8 |               |                                                     |      |      |       |       |      |
| K <sub>197</sub>                                                                      | S <sub>365</sub>                                                                                                                                             |                                     | 27.6 ± 2.7 | 71.8 ± 2.2 | 32.1 ± 2.0 | 65.1 ± 4.7 | 66.4 ± 2.1 | 54.1 ± 0.9 |               |                                                     |      |      |       |       |      |
| K <sub>208</sub>                                                                      | S <sub>365</sub>                                                                                                                                             |                                     | 34.2 ± 2.2 | 62.4 ± 1.7 | 44.3 ± 2.8 | 52.2 ± 4.3 | 78.6 ± 1.9 | 40.6 ± 0.7 |               |                                                     |      |      |       |       |      |
| K <sub>192</sub>                                                                      | K <sub>371</sub>                                                                                                                                             | 9D                                  | 22.6 ± 2.1 | 59.5 ± 2.3 | 30.4 ± 1.1 | 67.1 ± 3.2 | 54.4 ± 1.1 | 55.8 ± 1.8 |               |                                                     |      |      |       |       |      |
| K <sub>195</sub>                                                                      | K <sub>371</sub>                                                                                                                                             | 9D,14F                              | 22.3 ± 2.5 | 63.8 ± 2.2 | 29.2 ± 1.1 | 68.1 ± 3.2 | 51.5 ± 1.4 | 57.9 ± 1.9 |               |                                                     |      |      |       |       |      |
| K <sub>197</sub>                                                                      | K <sub>371</sub>                                                                                                                                             | 9D                                  | 20.8 ± 2.6 | 62.1 ± 2.7 | 34.8 ± 1.4 | 62.0 ± 2.9 | 56.2 ± 1.7 | 51.7 ± 1.9 |               |                                                     |      |      |       |       |      |
| K <sub>208</sub>                                                                      | K <sub>371</sub>                                                                                                                                             |                                     | 24.1 ± 1.5 | 53.6 ± 2.3 | 47.1 ± 1.9 | 50.3 ± 3.0 | 68.9 ± 1.5 | 37.2 ± 2.1 |               |                                                     |      |      |       |       |      |
| K <sub>192</sub>                                                                      | S <sub>376</sub>                                                                                                                                             |                                     | 14.8 ± 2.2 | 58.7 ± 1.9 | 28.6 ± 1.7 | 54.9 ± 3.2 | 50.7 ± 2.5 | 61.0 ± 1.4 |               |                                                     |      |      |       |       |      |
| K <sub>195</sub>                                                                      | S <sub>376</sub>                                                                                                                                             |                                     | 12.4 ± 2.5 | 63.4 ± 1.9 | 29.6 ± 2.3 | 55.6 ± 3.2 | 47.9 ± 2.8 | 63.7 ± 1.6 |               |                                                     |      |      |       |       |      |
| K <sub>197</sub>                                                                      | S <sub>376</sub>                                                                                                                                             |                                     | 11.1 ± 2.8 | 62.8 ± 2.0 | 34.4 ± 2.5 | 49.4 ± 2.8 | 51.3 ± 3.1 | 57.9 ± 1.5 |               |                                                     |      |      |       |       |      |
| K <sub>208</sub>                                                                      | S <sub>376</sub>                                                                                                                                             |                                     | 20.6 ± 1.8 | 56.6 ± 1.6 | 43.7 ± 1.9 | 38.6 ± 2.4 | 62.5 ± 2.5 | 43.4 ± 1.7 |               |                                                     |      |      |       |       |      |
| K <sub>192</sub>                                                                      | S <sub>377</sub>                                                                                                                                             |                                     | 16.3 ± 2.3 | 61.9 ± 2.0 | 28.4 ± 2.5 | 54.4 ± 3.8 | 53.6 ± 2.5 | 63.3 ± 2.2 |               |                                                     |      |      |       |       |      |
| K <sub>195</sub>                                                                      | S <sub>377</sub>                                                                                                                                             |                                     | 13.7 ± 2.2 | 66.6 ± 2.0 | 28.4 ± 1.6 | 55.0 ± 3.9 | 50.8 ± 2.7 | 65.9 ± 2.4 |               |                                                     |      |      |       |       |      |
| K <sub>197</sub>                                                                      | S <sub>377</sub>                                                                                                                                             |                                     | 13.8 ± 2.2 | 66.1 ± 2.1 | 33.7 ± 3.3 | 48.7 ± 3.5 | 53.9 ± 3.0 | 60.0 ± 2.2 |               |                                                     |      |      |       |       |      |
| K <sub>208</sub>                                                                      | S <sub>377</sub>                                                                                                                                             |                                     | 23.7 ± 2.0 | 59.8 ± 1.7 | 42.6 ± 1.6 | 37.6 ± 2.7 | 64.8 ± 1.6 | 45.6 ± 2.8 |               |                                                     |      |      |       |       |      |
| K <sub>192</sub>                                                                      | S <sub>379</sub>                                                                                                                                             |                                     | 17.3 ± 2.0 | 66.2 ± 2.0 | 28.5 ± 1.6 | 52.9 ± 3.1 | 57.4 ± 1.9 | 65.6 ± 1.6 |               |                                                     |      |      |       |       |      |
| K <sub>195</sub>                                                                      | S <sub>379</sub>                                                                                                                                             | 14F                                 | 14.4 ± 1.8 | 70.9 ± 2.0 | 29.2 ± 2.1 | 53.5 ± 3.4 | 54.5 ± 2.3 | 68.0 ± 1.7 |               |                                                     |      |      |       |       |      |
| K <sub>197</sub>                                                                      | S <sub>379</sub>                                                                                                                                             |                                     | 16.5 ± 1.6 | 70.6 ± 2.1 | 33.2 ± 2.6 | 47.1 ± 3.1 | 57.4 ± 2.4 | 62.1 ± 1.6 |               |                                                     |      |      |       |       |      |
| K <sub>208</sub>                                                                      | S <sub>379</sub>                                                                                                                                             |                                     | 28.1 ± 2.0 | 64.2 ± 2.0 | 40.9 ± 1.5 | 35.4 ± 2.2 | 67.7 ± 1.8 | 48.0 ± 1.8 |               |                                                     |      |      |       |       |      |
| K <sub>192</sub>                                                                      | T <sub>382</sub>                                                                                                                                             |                                     | 13.3 ± 1.9 | 65.2 ± 2.5 | 24.1 ± 1.5 | 48.0 ± 3.1 | 57.8 ± 2.3 | 62.3 ± 0.6 |               |                                                     |      |      |       |       |      |
| K <sub>195</sub>                                                                      | T <sub>382</sub>                                                                                                                                             |                                     | 10.2 ± 2.7 | 70.1 ± 2.4 | 25.8 ± 1.4 | 49.0 ± 3.2 | 55.4 ± 2.4 | 64.7 ± 0.5 |               |                                                     |      |      |       |       |      |
| K <sub>197</sub>                                                                      | T <sub>382</sub>                                                                                                                                             | 9D                                  | 14.5 ± 2.1 | 69.7 ± 2.4 | 28.9 ± 1.1 | 42.6 ± 2.8 | 58.2 ± 3.1 | 59.0 ± 0.7 |               |                                                     |      |      |       |       |      |
| K <sub>208</sub>                                                                      | T <sub>382</sub>                                                                                                                                             |                                     | 28.2 ± 3.4 | 63.1 ± 2.9 | 35.8 ± 1.7 | 30.2 ± 2.6 | 67.9 ± 2.8 | 45.1 ± 1.3 |               |                                                     |      |      |       |       |      |
| K <sub>192</sub>                                                                      | S <sub>383</sub>                                                                                                                                             |                                     | 14.4 ± 2.3 | 65.8 ± 2.1 | 25.6 ± 1.2 | 42.3 ± 3.2 | 57.1 ± 2.0 | 64.4 ± 0.3 |               |                                                     |      |      |       |       |      |
| K <sub>195</sub>                                                                      | S <sub>383</sub>                                                                                                                                             | 14F                                 | 10.2 ± 2.2 | 70.7 ± 2.0 | 28.3 ± 1.7 | 46.2 ± 3.3 | 54.8 ± 2.2 | 67.0 ± 0.5 |               |                                                     |      |      |       |       |      |
| K <sub>197</sub>                                                                      | S <sub>383</sub>                                                                                                                                             |                                     | 14.7 ± 2.2 | 70.6 ± 2.2 | 30.9 ± 2.0 | 39.7 ± 3.0 | 57.3 ± 2.7 | 61.3 ± 0.8 |               |                                                     |      |      |       |       |      |
| K <sub>208</sub>                                                                      | S <sub>383</sub>                                                                                                                                             |                                     | 29.2 ± 3.1 | 64.5 ± 2.6 | 36.2 ± 1.3 | 27.5 ± 2.6 | 66.4 ± 2.4 | 47.7 ± 1.6 |               |                                                     |      |      |       |       |      |
| K <sub>192</sub>                                                                      | S <sub>385</sub>                                                                                                                                             | 9D                                  | 19.9 ± 2.9 | 71.3 ± 2.5 | 27.9 ± 2.2 | 45.0 ± 3.0 | 61.7 ± 1.9 | 69.4 ± 1.7 |               |                                                     |      |      |       |       |      |
| K <sub>195</sub>                                                                      | S <sub>385</sub>                                                                                                                                             | 9D                                  | 15.0 ± 1.8 | 76.2 ± 2.5 | 30.7 ± 2.6 | 45.8 ± 3.3 | 59.3 ± 1.9 | 71.8 ± 1.8 |               |                                                     |      |      |       |       |      |
| K <sub>197</sub>                                                                      | S <sub>385</sub>                                                                                                                                             |                                     | 19.8 ± 1.9 | 76.3 ± 2.4 | 32.3 ± 2.6 | 39.2 ± 3.2 | 61.2 ± 2.4 | 66.2 ± 1.6 |               |                                                     |      |      |       |       |      |
| K <sub>208</sub>                                                                      | S <sub>385</sub>                                                                                                                                             | 9F                                  | 34.0 ± 1.8 | 70.4 ± 2.9 | 36.1 ± 2.5 | 26.4 ± 2.1 | 69.8 ± 2.1 | 52.8 ± 1.9 |               |                                                     |      |      |       |       |      |
| <b>Double digestion GluC&amp;AspN</b>                                                 |                                                                                                                                                              |                                     |            |            |            |            |            |            |               |                                                     |      |      |       |       |      |
| <b>FXN</b>                                                                            | <b>NFS1</b>                                                                                                                                                  |                                     |            |            |            |            |            |            |               | ≤5 %                                                | ≤10% | ≤20% | ≤25 % | ≤35 % | ≤60% |
| DWT <sub>169</sub> GK <sub>171</sub> NWVY <sub>175</sub> S <sub>176</sub> H           | S <sub>365</sub> LLMALK <sub>371</sub>                                                                                                                       |                                     |            |            |            |            |            |            | 2             | 2                                                   |      |      |       |       |      |
| K <sub>171</sub>                                                                      | S <sub>365</sub>                                                                                                                                             |                                     | 44.7±2.0   | 54.1±2.3   | 55.0±3.3   | 49.8±3.5   | 85.2±1.9   | 40.0±1.3   |               |                                                     |      |      |       |       |      |
| K <sub>171</sub>                                                                      | K <sub>371</sub>                                                                                                                                             |                                     | 35.1±1.4   | 46.2±2.9   | 55.6±2.3   | 48.5±2.1   | 75.9±1.9   | 32.9±0.9   |               |                                                     |      |      |       |       |      |
| T <sub>169</sub>                                                                      | K <sub>371</sub>                                                                                                                                             |                                     | 37.7±2.4   | 43.9±2.1   | 55.3±2.8   | 52.6±2.4   | 76.0±1.4   | 37.5±2.3   |               |                                                     |      |      |       |       |      |
| Y <sub>175</sub>                                                                      | K <sub>371</sub>                                                                                                                                             |                                     | 31.1±1.0   | 44.8±2.0   | 46.0±2.4   | 59.9±2.6   | 69.8±1.2   | 44.7±2.3   |               |                                                     |      |      |       |       |      |
| S <sub>176</sub>                                                                      | K <sub>371</sub>                                                                                                                                             |                                     | 33.2±1.2   | 41.7±2.1   | 47.0±2.4   | 61.5±2.5   | 72.6±1.4   | 45.1±1.7   |               |                                                     |      |      |       |       |      |

Supplemental Table S2f, p.3

| Cross-linked peptides                                                                                                                                                                                           |                                                                               | Distances (Å) measured in structure |            |            |            |            |            |            | # of peptides | False Discovery Rate (FDR) of cross-linked peptides |      |       |       |       |      |
|-----------------------------------------------------------------------------------------------------------------------------------------------------------------------------------------------------------------|-------------------------------------------------------------------------------|-------------------------------------|------------|------------|------------|------------|------------|------------|---------------|-----------------------------------------------------|------|-------|-------|-------|------|
| FXN <sup>42-210</sup>                                                                                                                                                                                           | NFS1                                                                          | Figure                              | 2-fold #1  | 2-fold #2  | 2-fold #3  | 3-fold     | 4-fold     | C-term     |               | ≤5 %                                                | ≤10% | ≤20%  | ≤25 % | ≤35 % | ≤60% |
| VLFQGGPHMART <sub>44</sub> DI                                                                                                                                                                                   | MEY <sub>317</sub> DHK <sub>320</sub> RIS <sub>323</sub> K <sub>324</sub> LSE |                                     |            |            |            |            |            |            | 2             |                                                     |      | 2     |       |       |      |
| T <sub>44</sub>                                                                                                                                                                                                 | K <sub>320</sub>                                                              | 9D                                  | 53.4±1.0   | 14.0±1.6   | 57.9±1.8   | 101.3±1.3  | 79.0±1.9   | 56.9±2.3   |               |                                                     |      |       |       |       |      |
| T <sub>44</sub>                                                                                                                                                                                                 | K <sub>324</sub>                                                              |                                     | 49.3±1.1   | 16.4±1.8   | 57.4±2.0   | 100.5±1.3  | 83.4±1.9   | 57.2±2.2   |               |                                                     |      |       |       |       |      |
|                                                                                                                                                                                                                 |                                                                               |                                     |            |            |            |            |            |            | ≤5 %          | ≤10%                                                | ≤20% | ≤25 % | ≤35 % | ≤60%  |      |
| DLGT <sub>142</sub> Y <sub>143</sub> VINK <sub>147</sub> QT <sub>149</sub> PNK <sub>152</sub> QIWL<br>S <sub>157</sub> S <sub>158</sub> PS <sub>160</sub> S <sub>161</sub> GPK <sub>164</sub> RY <sub>166</sub> | S <sub>365</sub> LLMALK <sub>371</sub>                                        |                                     |            |            |            |            |            |            | 1             | 1                                                   |      |       |       |       |      |
| K <sub>147</sub>                                                                                                                                                                                                | S <sub>365</sub>                                                              |                                     | 50.7±1.8   | 64.7±1.9   | 54.5±3.5   | 58.3±2.3   | 72.6±1.6   | 54.3±1.2   |               |                                                     |      |       |       |       |      |
| K <sub>147</sub>                                                                                                                                                                                                | K <sub>371</sub>                                                              |                                     | 43.5±1.6   | 56.6±1.5   | 51.8±2.0   | 55.6±1.9   | 63.5±1.6   | 48.8±1.3   |               |                                                     |      |       |       |       |      |
| K <sub>152</sub>                                                                                                                                                                                                | S <sub>365</sub>                                                              |                                     | 52.3±1.9   | 58.5±2.0   | 56.5±2.7   | 55.5±1.7   | 79.8±1.8   | 51.7±1.8   |               |                                                     |      |       |       |       |      |
| K <sub>152</sub>                                                                                                                                                                                                | K <sub>371</sub>                                                              |                                     | 44.7±1.3   | 51.5±1.6   | 55.8±1.8   | 54.4±1.8   | 71.2±1.8   | 45.2±1.7   |               |                                                     |      |       |       |       |      |
| K <sub>164</sub>                                                                                                                                                                                                | S <sub>365</sub>                                                              |                                     | 41.8±1.7   | 58.4±1.9   | 44.4±3.1   | 66.9±2.9   | 74.2±1.3   | 58.0±1.6   |               |                                                     |      |       |       |       |      |
| K <sub>164</sub>                                                                                                                                                                                                | K <sub>371</sub>                                                              |                                     | 34.0±0.9   | 49.4±1.7   | 43.1±1.9   | 63.5±2.5   | 64.7±1.1   | 50.7±1.3   |               |                                                     |      |       |       |       |      |
| T <sub>142</sub>                                                                                                                                                                                                | K <sub>371</sub>                                                              |                                     | 37.1±1.8   | 62.2±2.0   | 37.0±2.5   | 67.3±2.3   | 51.3±1.6   | 61.2±2.6   |               |                                                     |      |       |       |       |      |
| Y <sub>143</sub>                                                                                                                                                                                                | K <sub>371</sub>                                                              |                                     | 34.4±1.2   | 59.9±1.9   | 38.3±1.4   | 63.5±1.9   | 54.2±1.2   | 57.7±2.6   |               |                                                     |      |       |       |       |      |
| T <sub>149</sub>                                                                                                                                                                                                | K <sub>371</sub>                                                              |                                     | 47.6±1.3   | 54.5±1.3   | 56.8±2.0   | 56.2±2.1   | 69.2±1.9   | 49.1±1.8   |               |                                                     |      |       |       |       |      |
| S <sub>157</sub>                                                                                                                                                                                                | K <sub>371</sub>                                                              |                                     | 36.2±1.9   | 55.2±1.8   | 40.8±2.0   | 64.9±2.5   | 58.9±1.2   | 55.7±2.2   |               |                                                     |      |       |       |       |      |
| S <sub>158</sub>                                                                                                                                                                                                | K <sub>371</sub>                                                              |                                     | 32.9±1.9   | 54.8±1.7   | 37.5±1.9   | 65.1±1.7   | 57.8±1.3   | 54.9±1.2   |               |                                                     |      |       |       |       |      |
| S <sub>160</sub>                                                                                                                                                                                                | K <sub>371</sub>                                                              |                                     | 30.1±1.7   | 53.9±2.1   | 32.0±1.2   | 71.0±2.0   | 57.3±1.6   | 58.7±2.3   |               |                                                     |      |       |       |       |      |
| S <sub>161</sub>                                                                                                                                                                                                | K <sub>371</sub>                                                              |                                     | 30.7±1.4   | 51.1±2.0   | 35.4±1.8   | 68.7±2.3   | 60.6±1.4   | 56.8±2.4   |               |                                                     |      |       |       |       |      |
| Y <sub>166</sub>                                                                                                                                                                                                | K <sub>371</sub>                                                              |                                     | 36.0±1.5   | 47.8±1.6   | 48.0±1.6   | 58.3±2.3   | 68.3±1.0   | 45.9±1.8   |               |                                                     |      |       |       |       |      |
|                                                                                                                                                                                                                 |                                                                               |                                     |            |            |            |            |            |            | ≤5 %          | ≤10%                                                | ≤20% | ≤25 % | ≤35 % | ≤60%  |      |
| T <sub>93</sub> T <sub>94</sub> Y <sub>95</sub> E                                                                                                                                                               | DYVTEK <sub>425</sub> CIQHVK <sub>431</sub> RLRE                              |                                     |            |            |            |            |            |            | 1             | 1                                                   |      |       |       |       |      |
| T <sub>93</sub>                                                                                                                                                                                                 | K <sub>425</sub>                                                              | 9D                                  | 47.1 ± 1.8 | 54.2 ± 2.0 | 76.2 ± 1.2 | 44.6 ± 2.5 | 87.0 ± 1.9 | 30.1 ± 0.9 |               |                                                     |      |       |       |       |      |
| T <sub>94</sub>                                                                                                                                                                                                 | K <sub>425</sub>                                                              |                                     | 47.4 ± 1.7 | 55.2 ± 1.9 | 74.4 ± 1.2 | 46.1 ± 2.5 | 84.3 ± 1.9 | 34.0 ± 0.9 |               |                                                     |      |       |       |       |      |
| Y <sub>95</sub>                                                                                                                                                                                                 | K <sub>425</sub>                                                              |                                     | 45.8 ± 1.7 | 54.4 ± 2.2 | 71.8 ± 1.4 | 49.1 ± 2.2 | 82.0 ± 1.7 | 35.9 ± 0.8 |               |                                                     |      |       |       |       |      |
| T <sub>93</sub>                                                                                                                                                                                                 | K <sub>431</sub>                                                              |                                     | 55.7 ± 1.5 | 56.7 ± 2.4 | 75.4 ± 1.2 | 46.8 ± 3.0 | 95.6 ± 1.8 | 32.6 ± 0.9 |               |                                                     |      |       |       |       |      |
| T <sub>94</sub>                                                                                                                                                                                                 | K <sub>431</sub>                                                              |                                     | 55.8 ± 1.5 | 59.9 ± 2.8 | 74.0 ± 1.1 | 49.9 ± 2.2 | 92.8 ± 1.9 | 36.5 ± 1.0 |               |                                                     |      |       |       |       |      |
| Y <sub>95</sub>                                                                                                                                                                                                 | K <sub>431</sub>                                                              |                                     | 54.3 ± 1.8 | 58.2 ± 2.6 | 71.6 ± 1.5 | 52.9 ± 2.0 | 90.5 ± 1.6 | 38.6 ± 1.0 |               |                                                     |      |       |       |       |      |
|                                                                                                                                                                                                                 |                                                                               |                                     |            |            |            |            |            |            | ≤5 %          | ≤10%                                                | ≤20% | ≤25 % | ≤35 % | ≤60%  |      |
| T <sub>93</sub> T <sub>94</sub> Y <sub>95</sub> ERLAE                                                                                                                                                           | S <sub>365</sub> LLMALK <sub>371</sub>                                        |                                     |            |            |            |            |            |            | 1             |                                                     | 1    |       |       |       |      |
| T <sub>93</sub>                                                                                                                                                                                                 | K <sub>371</sub>                                                              | 9D                                  | 45.3±1.9   | 53.9±2.1   | 67.8±1.6   | 34.8±2.1   | 28.4±0.8   | 24.6±1.5   |               |                                                     |      |       |       |       |      |
| T <sub>94</sub>                                                                                                                                                                                                 | K <sub>371</sub>                                                              |                                     | 45.1±1.7   | 54.6±1.9   | 66.1±1.5   | 36.5±2.3   | 31.0±0.3   | 27.5±0.6   |               |                                                     |      |       |       |       |      |
| Y <sub>95</sub>                                                                                                                                                                                                 | K <sub>371</sub>                                                              |                                     | 43.9±1.7   | 53.5±1.9   | 63.4±1.8   | 40.8±3.1   | 33.8±1.1   | 30.5±0.9   |               |                                                     |      |       |       |       |      |
|                                                                                                                                                                                                                 |                                                                               |                                     |            |            |            |            |            |            |               |                                                     |      |       |       |       |      |
| <b>LOW SCORE PEPTIDES</b>                                                                                                                                                                                       |                                                                               |                                     |            |            |            |            |            |            | ≤5 %          | ≤10%                                                | ≤20% | ≤25 % | ≤35 % | ≤60%  |      |
| DATCTPRRASSNQRLNQNIVNVK <sub>69</sub> K <sub>70</sub> Q<br>SVYLMNLRK <sub>80</sub> SGTLGHGPGSL                                                                                                                  | MS <sub>437</sub> PLWE                                                        |                                     |            |            |            |            |            |            | 1             |                                                     |      |       |       |       | 1    |
| K <sub>69</sub>                                                                                                                                                                                                 | S <sub>437</sub>                                                              | 9D                                  | 29.5±0.8   | 43.1±1.1   | 57.8±2.0   | 71.5±1.6   | 43.9±2.1   | 41.6±0.7   |               |                                                     |      |       |       |       |      |
| K <sub>70</sub>                                                                                                                                                                                                 | S <sub>437</sub>                                                              |                                     | 32.7±0.9   | 40.2±1.1   | 61.5±2.0   | 70.1±1.4   | 41.9±2.2   | 41.3±1.2   |               |                                                     |      |       |       |       |      |
| K <sub>80</sub>                                                                                                                                                                                                 | S <sub>437</sub>                                                              | 9D                                  | 42.7±1.4   | 57.9±2.9   | 53.4±1.5   | 56.1±2.7   | 28.7±1.9   | 23.4±1.3   |               |                                                     |      |       |       |       |      |
|                                                                                                                                                                                                                 |                                                                               |                                     |            |            |            |            |            |            | ≤5 %          | ≤10%                                                | ≤20% | ≤25 % | ≤45 % | ≤60%  |      |
| DYDVSGSGVLTVK <sub>135</sub> LGG                                                                                                                                                                                | HK <sub>157</sub> CVLDSCRSL                                                   |                                     |            |            |            |            |            |            | 3             |                                                     |      |       |       | 1     | 2    |
| K <sub>135</sub>                                                                                                                                                                                                | K <sub>157</sub>                                                              | 9D                                  | 30.3±1.7   | 70.6±1.6   | 45.6±2.6   | 52.2±2.1   | 45.8±1.6   | 71.1±1.1   |               |                                                     |      |       |       |       |      |



Supplemental Table S2g, p.1

| Cross-linked peptides                                                                                           |                                                                                                             | Figure | Distances (Å) measured in structure |            |            |            |             |            | # of peptides | False Discovery Rate (FDR) of cross linked peptides |      |      |       |       |      |
|-----------------------------------------------------------------------------------------------------------------|-------------------------------------------------------------------------------------------------------------|--------|-------------------------------------|------------|------------|------------|-------------|------------|---------------|-----------------------------------------------------|------|------|-------|-------|------|
| ISCU                                                                                                            | NFS1                                                                                                        |        | 2-fold #1                           | 2-fold #2  | 2-fold #3  | 3-fold     | 4-fold      | C-term     |               | ≤5 %                                                | ≤10% | ≤20% | ≤25 % | ≤35 % | ≤60% |
| <b>Single digestion GluC</b>                                                                                    |                                                                                                             |        |                                     |            |            |            |             |            |               | ≤5 %                                                | ≤10% | ≤20% | ≤25 % | ≤35 % | ≤60% |
| *K <sub>166</sub> K <sub>167</sub>                                                                              | IIFT <sub>124</sub> S <sub>125</sub> GAT <sub>128</sub> E                                                   |        |                                     |            |            |            |             |            | 3             | 3                                                   |      |      |       |       |      |
| K <sub>166</sub>                                                                                                | T <sub>124</sub>                                                                                            |        | 39.1 ± 2.1                          | 38.1 ± 2.2 | 37.9 ± 2.7 | 51.1 ± 2.0 | 60.2 ± 1.7  | 53.5 ± 1.9 |               |                                                     |      |      |       |       |      |
| K <sub>166</sub>                                                                                                | S <sub>125</sub>                                                                                            |        | 35.5 ± 2.1                          | 35.6 ± 2.2 | 37.4 ± 2.7 | 51.1 ± 1.8 | 60.6 ± 1.7  | 50.1 ± 1.9 |               |                                                     |      |      |       |       |      |
| K <sub>166</sub>                                                                                                | T <sub>128</sub>                                                                                            |        | 38.9 ± 1.2                          | 42.2 ± 2.0 | 35.0 ± 2.5 | 50.3 ± 2.2 | 68.5 ± 1.9  | 55.8 ± 2.2 |               |                                                     |      |      |       |       |      |
| K <sub>167</sub>                                                                                                | T <sub>124</sub>                                                                                            |        | 40.4 ± 2.4                          | 37.3 ± 1.5 | 36.6 ± 2.9 | 53.8 ± 1.6 | 60.9 ± 1.5  | 56.6 ± 1.6 |               |                                                     |      |      |       |       |      |
| K <sub>167</sub>                                                                                                | S <sub>125</sub>                                                                                            |        | 35.9 ± 1.6                          | 34.4 ± 1.3 | 34.8 ± 1.8 | 53.6 ± 1.0 | 60.9 ± 1.6  | 53.3 ± 1.6 |               |                                                     |      |      |       |       |      |
| K <sub>167</sub>                                                                                                | T <sub>128</sub>                                                                                            | 9E     | 39.3 ± 1.5                          | 40.6 ± 1.8 | 32.2 ± 2.0 | 52.6 ± 1.4 | 69.0 ± 1.6  | 58.5 ± 1.8 |               |                                                     |      |      |       |       |      |
|                                                                                                                 |                                                                                                             |        |                                     |            |            |            |             |            |               | ≤5 %                                                | ≤10% | ≤20% | ≤25 % | ≤35 % | ≤60% |
| PK <sub>160</sub> K <sub>161</sub> GE                                                                           | VDY <sub>421</sub> T <sub>422</sub> VEK <sub>425</sub> CIQHVK <sub>431</sub> RLRE<br>MS <sub>437</sub> PLWE |        |                                     |            |            |            |             |            | 1             |                                                     |      | 1    |       |       |      |
| K <sub>160</sub>                                                                                                | Y <sub>421</sub>                                                                                            | 9E     | 28.0 ± 1.0                          | 23.1 ± 1.6 | 66.8 ± 1.2 | 76.2 ± 1.0 | 85.9 ± 1.5  | 32.4 ± 1.2 |               |                                                     |      |      |       |       |      |
| K <sub>160</sub>                                                                                                | T <sub>422</sub>                                                                                            |        | 30.7 ± 1.3                          | 25.2 ± 1.2 | 64.1 ± 1.1 | 43.7 ± 0.9 | 87.0 ± 1.1  | 35.3 ± 1.2 |               |                                                     |      |      |       |       |      |
| K <sub>160</sub>                                                                                                | K <sub>425</sub>                                                                                            | 9E     | 29.3 ± 1.2                          | 25.9 ± 1.2 | 63.3 ± 1.3 | 72.5 ± 1.0 | 90.2 ± 1.0  | 35.3 ± 1.0 |               |                                                     |      |      |       |       |      |
| K <sub>160</sub>                                                                                                | K <sub>431</sub>                                                                                            |        | 33.7 ± 2.3                          | 33.7 ± 1.5 | 64.2 ± 1.9 | 72.7 ± 1.6 | 99.6 ± 0.7  | 40.9 ± 0.7 |               |                                                     |      |      |       |       |      |
| K <sub>160</sub>                                                                                                | S <sub>437</sub>                                                                                            |        | 36.4 ± 2.6                          | 39.2 ± 1.8 | 61.1 ± 2.1 | 68.5 ± 1.8 | 105.6 ± 1.6 | 45.5 ± 0.9 |               |                                                     |      |      |       |       |      |
| K <sub>161</sub>                                                                                                | Y <sub>421</sub>                                                                                            |        | 29.7 ± 1.3                          | 26.5 ± 1.4 | 66.9 ± 1.1 | 73.7 ± 1.0 | 84.5 ± 1.5  | 32.5 ± 1.6 |               |                                                     |      |      |       |       |      |
| K <sub>161</sub>                                                                                                | T <sub>422</sub>                                                                                            |        | 32.0 ± 1.2                          | 28.7 ± 1.3 | 64.3 ± 0.9 | 71.4 ± 1.0 | 85.4 ± 1.1  | 35.1 ± 1.6 |               |                                                     |      |      |       |       |      |
| K <sub>161</sub>                                                                                                | K <sub>425</sub>                                                                                            |        | 30.9 ± 1.1                          | 29.3 ± 1.4 | 63.4 ± 1.1 | 70.3 ± 1.0 | 88.6 ± 0.9  | 35.0 ± 1.4 |               |                                                     |      |      |       |       |      |
| K <sub>161</sub>                                                                                                | K <sub>431</sub>                                                                                            |        | 35.9 ± 2.1                          | 36.2 ± 1.6 | 64.4 ± 1.6 | 70.8 ± 1.6 | 97.9 ± 0.8  | 40.6 ± 1.0 |               |                                                     |      |      |       |       |      |
| K <sub>161</sub>                                                                                                | S <sub>437</sub>                                                                                            |        | 38.6 ± 2.5                          | 40.8 ± 1.7 | 61.2 ± 1.8 | 66.8 ± 1.7 | 103.7 ± 1.5 | 44.5 ± 1.2 |               |                                                     |      |      |       |       |      |
|                                                                                                                 |                                                                                                             |        |                                     |            |            |            |             |            |               | ≤5 %                                                | ≤10% | ≤20% | ≤25 % | ≤35 % | ≤60% |
| WVK <sub>110</sub> GK <sub>112</sub> TVEE                                                                       | PS <sub>389</sub> Y <sub>390</sub> VLRAIGT <sub>397</sub> DE                                                |        |                                     |            |            |            |             |            | 2             |                                                     |      |      | 1     |       | 1    |
| K <sub>110</sub>                                                                                                | S <sub>389</sub>                                                                                            |        | 29.7 ± 1.5                          | 66.5 ± 1.9 | 31.7 ± 2.6 | 41.6 ± 1.6 | 76.4 ± 2.5  | 61.6 ± 1.1 |               |                                                     |      |      |       |       |      |
| K <sub>110</sub>                                                                                                | Y <sub>390</sub>                                                                                            |        | 30.2 ± 1.4                          | 67.1 ± 2.1 | 35.5 ± 3.5 | 43.5 ± 1.0 | 75.9 ± 2.6  | 63.7 ± 1.0 |               |                                                     |      |      |       |       |      |
| K <sub>110</sub>                                                                                                | T <sub>397</sub>                                                                                            |        | 28.4 ± 0.9                          | 66.4 ± 1.4 | 35.5 ± 2.7 | 50.4 ± 2.2 | 81.7 ± 2.4  | 58.5 ± 0.9 |               |                                                     |      |      |       |       |      |
| K <sub>112</sub>                                                                                                | S <sub>389</sub>                                                                                            |        | 32.8 ± 1.2                          | 65.3 ± 2.1 | 36.4 ± 2.9 | 38.8 ± 1.6 | 75.9 ± 2.6  | 56.9 ± 1.1 |               |                                                     |      |      |       |       |      |
| K <sub>112</sub>                                                                                                | Y <sub>390</sub>                                                                                            |        | 33.7 ± 1.6                          | 66.2 ± 2.1 | 40.3 ± 3.7 | 41.0 ± 1.0 | 75.6 ± 2.3  | 59.1 ± 1.0 |               |                                                     |      |      |       |       |      |
| K <sub>112</sub>                                                                                                | T <sub>397</sub>                                                                                            |        | 33.2 ± 1.2                          | 65.3 ± 1.6 | 40.1 ± 2.4 | 47.4 ± 2.0 | 81.8 ± 2.3  | 54.3 ± 0.8 |               |                                                     |      |      |       |       |      |
|                                                                                                                 |                                                                                                             |        |                                     |            |            |            |             |            |               | ≤5 %                                                | ≤10% | ≤20% | ≤25 % | ≤35 % | ≤60% |
| ALT <sub>119</sub> IK <sub>121</sub> NT <sub>123</sub> DIAK <sub>127</sub> ELCLPPVK <sub>135</sub> LHC<br>SMLAE | PS <sub>389</sub> Y <sub>390</sub> VLRAIGT <sub>397</sub> DE                                                |        |                                     |            |            |            |             |            | 1             |                                                     |      |      | 1     |       |      |
| K <sub>121</sub>                                                                                                | S <sub>389</sub>                                                                                            |        | 31.8 ± 1.0                          | 58.9 ± 2.0 | 29.1 ± 1.5 | 50.7 ± 2.1 | 73.3 ± 2.4  | 65.4 ± 1.0 |               |                                                     |      |      |       |       |      |
| K <sub>121</sub>                                                                                                | Y <sub>390</sub>                                                                                            |        | 34.5 ± 1.6                          | 59.8 ± 2.4 | 32.9 ± 1.6 | 53.1 ± 1.7 | 73.4 ± 2.4  | 67.8 ± 1.1 |               |                                                     |      |      |       |       |      |
| K <sub>121</sub>                                                                                                | T <sub>397</sub>                                                                                            |        | 32.8 ± 1.3                          | 60.9 ± 1.5 | 34.2 ± 1.2 | 59.4 ± 2.4 | 78.3 ± 2.0  | 64.6 ± 0.7 |               |                                                     |      |      |       |       |      |
| K <sub>127</sub>                                                                                                | S <sub>389</sub>                                                                                            |        | 23.3 ± 1.1                          | 68.6 ± 1.9 | 30.5 ± 1.5 | 49.9 ± 3.0 | 64.5 ± 2.4  | 68.4 ± 1.1 |               |                                                     |      |      |       |       |      |
| K <sub>127</sub>                                                                                                | Y <sub>390</sub>                                                                                            | 9E     | 25.6 ± 1.0                          | 69.4 ± 2.4 | 34.4 ± 1.7 | 51.9 ± 2.8 | 64.4 ± 2.4  | 71.1 ± 1.0 |               |                                                     |      |      |       |       |      |
| K <sub>127</sub>                                                                                                | T <sub>397</sub>                                                                                            |        | 26.7 ± 1.0                          | 70.8 ± 1.6 | 33.3 ± 1.6 | 59.3 ± 3.4 | 69.4 ± 2.0  | 67.2 ± 1.2 |               |                                                     |      |      |       |       |      |
| K <sub>135</sub>                                                                                                | S <sub>389</sub>                                                                                            | 14F    | 25.4 ± 2.6                          | 64.0 ± 1.4 | 23.4 ± 1.7 | 61.7 ± 2.0 | 67.6 ± 2.3  | 78.5 ± 1.4 |               |                                                     |      |      |       |       |      |
| K <sub>135</sub>                                                                                                | Y <sub>390</sub>                                                                                            | 14F    | 28.2 ± 2.3                          | 64.1 ± 1.7 | 26.1 ± 1.4 | 63.1 ± 2.4 | 68.9 ± 1.5  | 81.1 ± 1.3 |               |                                                     |      |      |       |       |      |
| K <sub>135</sub>                                                                                                | T <sub>397</sub>                                                                                            |        | 27.2 ± 3.1                          | 67.4 ± 1.3 | 25.8 ± 2.0 | 71.0 ± 2.3 | 72.1 ± 1.5  | 77.7 ± 1.3 |               |                                                     |      |      |       |       |      |

Supplemental Table S2g, p.2

| Cross-linked peptides                                                            |                                                                             | Figure | Distances (Å) measured in structure |            |            |            |             |            | # of peptides | False Discovery Rate (FDR) of cross linked peptides |      |      |       |       |      |
|----------------------------------------------------------------------------------|-----------------------------------------------------------------------------|--------|-------------------------------------|------------|------------|------------|-------------|------------|---------------|-----------------------------------------------------|------|------|-------|-------|------|
| ISCU                                                                             | NFS1                                                                        |        | 2-fold #1                           | 2-fold #2  | 2-fold #3  | 3-fold     | 4-fold      | C-term     |               | ≤5 %                                                | ≤10% | ≤20% | ≤25 % | ≤35 % | ≤60% |
| DAIK <sub>147</sub> AALADY <sub>153</sub> K <sub>154</sub> LK <sub>156</sub> QE  | MS <sub>437</sub> PLWE                                                      |        |                                     |            |            |            |             |            |               |                                                     | 1    |      |       | 1     |      |
| K <sub>147</sub>                                                                 | S <sub>437</sub>                                                            |        | 24.5 ± 2.0                          | 52.9 ± 0.9 | 46.1 ± 1.8 | 75.3 ± 2.4 | 93.2 ± 0.6  | 47.7 ± 0.8 |               |                                                     |      |      |       |       |      |
| K <sub>154</sub>                                                                 | S <sub>437</sub>                                                            |        | 30.5 ± 1.7                          | 43.9 ± 1.0 | 54.8 ± 1.7 | 70.2 ± 1.9 | 102.9 ± 0.6 | 43.1 ± 0.6 |               |                                                     |      |      |       |       |      |
| K <sub>156</sub>                                                                 | S <sub>437</sub>                                                            |        | 29.8 ± 1.3                          | 41.3 ± 0.8 | 57.3 ± 1.9 | 71.2 ± 1.8 | 107.5 ± 0.5 | 43.7 ± 0.7 |               |                                                     |      |      |       |       |      |
| PK <sub>160</sub> K <sub>161</sub> GE AEK <sub>166</sub> K <sub>167</sub>        | S <sub>99</sub> EAAME                                                       |        |                                     |            |            |            |             |            | 4             |                                                     |      | 1    |       | 3     |      |
| K <sub>160</sub>                                                                 | S <sub>99</sub>                                                             |        | 43.4 ± 1.1                          | 33.1 ± 1.0 | 63.4 ± 2.4 | 72.3 ± 2.2 | 47.1 ± 2.5  | 40.1 ± 0.7 |               |                                                     |      |      |       |       |      |
| K <sub>161</sub>                                                                 | S <sub>99</sub>                                                             |        | 40.5 ± 1.3                          | 32.9 ± 0.7 | 62.9 ± 2.4 | 69.1 ± 2.0 | 44.9 ± 2.6  | 38.4 ± 1.0 |               |                                                     |      |      |       |       |      |
| K <sub>166</sub>                                                                 | S <sub>99</sub>                                                             |        | 38.2 ± 2.2                          | 26.9 ± 1.8 | 55.9 ± 3.9 | 66.5 ± 3.2 | 37.5 ± 2.7  | 45.1 ± 1.7 |               |                                                     |      |      |       |       |      |
| K <sub>167</sub>                                                                 | S <sub>99</sub>                                                             | 9E     | 40.7 ± 1.8                          | 25.1 ± 0.8 | 54.7 ± 3.2 | 69.1 ± 2.9 | 37.8 ± 2.4  | 47.8 ± 1.9 |               |                                                     |      |      |       |       |      |
| PK <sub>160</sub> K <sub>161</sub> GE                                            | Y <sub>317</sub> DHK <sub>320</sub> RIS <sub>323</sub> K <sub>324</sub> LSE |        |                                     |            |            |            |             |            | 1             | 1                                                   |      |      |       |       |      |
| K <sub>160</sub>                                                                 | Y <sub>317</sub>                                                            |        | 41.6 ± 1.0                          | 31.1 ± 1.1 | 73.1 ± 1.1 | 83.6 ± 1.0 | 72.8 ± 2.3  | 39.8 ± 1.2 |               |                                                     |      |      |       |       |      |
| K <sub>160</sub>                                                                 | K <sub>320</sub>                                                            | 9E     | 42.7 ± 1.1                          | 32.8 ± 1.2 | 71.3 ± 0.8 | 81.9 ± 0.7 | 77.4 ± 2.0  | 42.3 ± 1.4 |               |                                                     |      |      |       |       |      |
| K <sub>160</sub>                                                                 | S <sub>323</sub>                                                            |        | 41.6 ± 1.4                          | 32.2 ± 1.3 | 67.6 ± 0.7 | 78.2 ± 0.8 | 80.6 ± 1.6  | 42.5 ± 1.6 |               |                                                     |      |      |       |       |      |
| K <sub>160</sub>                                                                 | K <sub>324</sub>                                                            | 9E     | 40.8 ± 1.2                          | 31.9 ± 1.2 | 70.2 ± 0.6 | 80.7 ± 0.7 | 82.4 ± 1.8  | 41.9 ± 1.4 |               |                                                     |      |      |       |       |      |
| K <sub>160</sub>                                                                 | S <sub>326</sub>                                                            |        | 38.5 ± 1.4                          | 30.1 ± 1.3 | 64.9 ± 0.6 | 75.4 ± 0.7 | 83.1 ± 1.5  | 40.8 ± 1.5 |               |                                                     |      |      |       |       |      |
| K <sub>161</sub>                                                                 | Y <sub>317</sub>                                                            |        | 41.3 ± 1.2                          | 34.2 ± 1.3 | 73.6 ± 1.0 | 81.1 ± 0.8 | 71.7 ± 2.4  | 40.3 ± 1.5 |               |                                                     |      |      |       |       |      |
| K <sub>161</sub>                                                                 | K <sub>320</sub>                                                            |        | 42.7 ± 1.2                          | 35.9 ± 1.3 | 71.9 ± 0.7 | 79.6 ± 0.5 | 76.2 ± 2.1  | 42.5 ± 1.8 |               |                                                     |      |      |       |       |      |
| K <sub>161</sub>                                                                 | S <sub>323</sub>                                                            |        | 41.8 ± 1.5                          | 35.5 ± 1.4 | 68.3 ± 0.8 | 75.9 ± 0.6 | 79.2 ± 1.7  | 42.4 ± 2.1 |               |                                                     |      |      |       |       |      |
| K <sub>161</sub>                                                                 | K <sub>324</sub>                                                            |        | 41.3 ± 1.3                          | 35.4 ± 1.3 | 70.8 ± 0.7 | 78.4 ± 0.6 | 81.1 ± 1.8  | 42.1 ± 1.8 |               |                                                     |      |      |       |       |      |
| K <sub>161</sub>                                                                 | S <sub>326</sub>                                                            |        | 38.9 ± 1.5                          | 33.5 ± 1.6 | 65.6 ± 0.7 | 73.1 ± 0.6 | 81.6 ± 1.5  | 40.5 ± 2.0 |               |                                                     |      |      |       |       |      |
| WVK <sub>110</sub> GK <sub>112</sub> TVEE                                        | VDY <sub>421</sub> T <sub>422</sub> VE                                      |        |                                     |            |            |            |             |            | 1             | 1                                                   |      |      |       |       | 3    |
| K <sub>110</sub>                                                                 | Y <sub>421</sub>                                                            |        | 13.4 ± 1.3                          | 41.3 ± 1.0 | 54.8 ± 1.0 | 72.2 ± 1.6 | 69.4 ± 1.1  | 39.6 ± 1.2 |               |                                                     |      |      |       |       |      |
| K <sub>110</sub>                                                                 | T <sub>422</sub>                                                            | 9E     | 13.2 ± 1.1                          | 44.2 ± 1.1 | 52.4 ± 0.9 | 69.3 ± 1.7 | 70.2 ± 1.0  | 42.0 ± 1.1 |               |                                                     |      |      |       |       |      |
| K <sub>112</sub>                                                                 | Y <sub>421</sub>                                                            | 9E     | 17.5 ± 2.1                          | 41.1 ± 1.2 | 58.1 ± 1.0 | 68.2 ± 1.8 | 71.0 ± 1.3  | 36.7 ± 1.5 |               |                                                     |      |      |       |       |      |
| K <sub>112</sub>                                                                 | T <sub>422</sub>                                                            |        | 18.0 ± 1.6                          | 44.0 ± 1.2 | 55.8 ± 0.7 | 65.4 ± 1.9 | 71.6 ± 0.9  | 38.9 ± 1.3 |               |                                                     |      |      |       |       |      |
| *DAIK <sub>147</sub> AALADY <sub>153</sub> K <sub>154</sub> LK <sub>156</sub> QE | IIFT <sub>124</sub> S <sub>125</sub> GAT <sub>128</sub> E                   |        |                                     |            |            |            |             |            | 1             | 1                                                   |      |      |       |       |      |
| K <sub>147</sub>                                                                 | T <sub>124</sub>                                                            |        | 38.1 ± 1.6                          | 40.8 ± 1.1 | 37.7 ± 2.5 | 52.6 ± 0.9 | 59.5 ± 2.6  | 61.0 ± 0.7 |               |                                                     |      |      |       |       |      |
| K <sub>147</sub>                                                                 | S <sub>125</sub>                                                            |        | 34.0 ± 1.2                          | 38.4 ± 1.1 | 35.6 ± 1.9 | 52.7 ± 1.3 | 58.9 ± 2.2  | 57.6 ± 0.6 |               |                                                     |      |      |       |       |      |
| K <sub>147</sub>                                                                 | T <sub>128</sub>                                                            | 9E     | 35.7 ± 0.5                          | 44.3 ± 1.2 | 31.4 ± 1.9 | 51.3 ± 0.9 | 67.5 ± 2.6  | 62.1 ± 0.6 |               |                                                     |      |      |       |       |      |
| K <sub>154</sub>                                                                 | T <sub>124</sub>                                                            |        | 44.0 ± 1.2                          | 42.6 ± 1.2 | 44.3 ± 1.9 | 53.9 ± 0.9 | 66.6 ± 2.5  | 54.9 ± 0.7 |               |                                                     |      |      |       |       |      |
| K <sub>154</sub>                                                                 | S <sub>125</sub>                                                            |        | 40.5 ± 1.3                          | 39.7 ± 1.2 | 43.8 ± 1.9 | 53.5 ± 0.8 | 67.0 ± 2.6  | 51.5 ± 0.7 |               |                                                     |      |      |       |       |      |
| K <sub>154</sub>                                                                 | T <sub>128</sub>                                                            |        | 42.8 ± 0.6                          | 44.0 ± 0.9 | 39.8 ± 2.0 | 50.8 ± 1.0 | 75.0 ± 2.5  | 55.8 ± 0.7 |               |                                                     |      |      |       |       |      |
| K <sub>156</sub>                                                                 | T <sub>124</sub>                                                            |        | 48.1 ± 1.2                          | 43.7 ± 1.1 | 47.0 ± 2.6 | 57.4 ± 1.3 | 70.7 ± 2.3  | 56.1 ± 0.7 |               |                                                     |      |      |       |       |      |
| K <sub>156</sub>                                                                 | S <sub>125</sub>                                                            |        | 44.7 ± 1.3                          | 40.9 ± 1.3 | 45.8 ± 1.8 | 57.0 ± 0.9 | 70.6 ± 1.8  | 52.9 ± 0.7 |               |                                                     |      |      |       |       |      |
| K <sub>156</sub>                                                                 | T <sub>128</sub>                                                            |        | 46.5 ± 0.5                          | 44.3 ± 0.8 | 41.2 ± 2.2 | 53.7 ± 1.5 | 78.6 ± 1.8  | 57.0 ± 0.5 |               |                                                     |      |      |       |       |      |

Supplemental Table S2g, p.3

| Cross-linked peptides                                                     |                                                                                                                                                               | Distances (Å) measured in structure |            |            |            |            |            |            | # of peptides | False Discovery Rate (FDR) of cross-linked peptides |      |       |       |       |      |
|---------------------------------------------------------------------------|---------------------------------------------------------------------------------------------------------------------------------------------------------------|-------------------------------------|------------|------------|------------|------------|------------|------------|---------------|-----------------------------------------------------|------|-------|-------|-------|------|
| ISCU                                                                      | NFS1                                                                                                                                                          | Figure                              | 2-fold #1  | 2-fold #2  | 2-fold #3  | 3-fold     | 4-fold     | C-term     |               | ≤5 %                                                | ≤10% | ≤20%  | ≤25 % | ≤35 % | ≤60% |
| ALTIK <sub>121</sub> NTDIAK <sub>127</sub> ELCLPPVK <sub>135</sub> LHCSML | VDY <sub>421</sub> T <sub>422</sub> VE                                                                                                                        |                                     |            |            |            |            |            |            | 1             | 1                                                   |      |       |       |       |      |
| K <sub>121</sub>                                                          | Y <sub>421</sub>                                                                                                                                              | 9E                                  | 26.6 ± 0.7 | 41.5 ± 1.4 | 48.9 ± 1.2 | 76.8 ± 1.9 | 64.7 ± 1.3 | 47.0 ± 1.2 |               |                                                     |      |       |       |       |      |
| K <sub>121</sub>                                                          | T <sub>422</sub>                                                                                                                                              |                                     | 26.4 ± 0.8 | 43.4 ± 1.4 | 46.8 ± 1.0 | 75.3 ± 2.1 | 65.8 ± 0.9 | 49.3 ± 1.1 |               |                                                     |      |       |       |       |      |
| K <sub>127</sub>                                                          | Y <sub>421</sub>                                                                                                                                              | 9E                                  | 27.8 ± 1.0 | 50.6 ± 1.7 | 44.5 ± 0.9 | 76.6 ± 2.0 | 56.4 ± 1.0 | 52.1 ± 1.2 |               |                                                     |      |       |       |       |      |
| K <sub>127</sub>                                                          | T <sub>422</sub>                                                                                                                                              |                                     | 26.6 ± 1.1 | 52.8 ± 1.7 | 42.8 ± 0.6 | 72.6 ± 1.6 | 57.2 ± 0.7 | 54.1 ± 1.0 |               |                                                     |      |       |       |       |      |
| K <sub>135</sub>                                                          | Y <sub>421</sub>                                                                                                                                              |                                     | 33.5 ± 1.5 | 50.1 ± 1.6 | 35.2 ± 1.4 | 87.5 ± 1.8 | 54.0 ± 1.2 | 60.3 ± 1.3 |               |                                                     |      |       |       |       |      |
| K <sub>135</sub>                                                          | T <sub>422</sub>                                                                                                                                              |                                     | 31.9 ± 1.8 | 51.7 ± 1.7 | 33.2 ± 1.7 | 85.2 ± 2.2 | 55.6 ± 1.2 | 62.7 ± 1.1 |               |                                                     |      |       |       |       |      |
|                                                                           |                                                                                                                                                               |                                     |            |            |            |            |            |            | ≤5 %          | ≤10%                                                | ≤20% | ≤25 % | ≤35 % | ≤60%  |      |
| K <sub>166</sub> K <sub>167</sub>                                         | PS <sub>389</sub> Y <sub>390</sub> VLRAIGT <sub>397</sub> DE                                                                                                  |                                     |            |            |            |            |            |            | 1             | 1                                                   |      |       |       |       |      |
| K <sub>166</sub>                                                          | S <sub>389</sub>                                                                                                                                              |                                     | 42.2 ± 1.3 | 49.9 ± 2.6 | 33.5 ± 2.8 | 50.5 ± 2.7 | 82.4 ± 1.6 | 60.0 ± 2.7 |               |                                                     |      |       |       |       |      |
| K <sub>166</sub>                                                          | Y <sub>390</sub>                                                                                                                                              |                                     | 44.3 ± 1.2 | 50.7 ± 2.8 | 36.7 ± 2.9 | 52.8 ± 2.6 | 83.5 ± 2.4 | 61.6 ± 2.7 |               |                                                     |      |       |       |       |      |
| K <sub>166</sub>                                                          | T <sub>397</sub>                                                                                                                                              |                                     | 42.3 ± 1.3 | 51.8 ± 2.6 | 40.8 ± 1.6 | 58.1 ± 1.7 | 88.7 ± 2.1 | 59.6 ± 2.4 |               |                                                     |      |       |       |       |      |
| K <sub>167</sub>                                                          | S <sub>389</sub>                                                                                                                                              |                                     | 41.6 ± 2.6 | 49.7 ± 2.7 | 30.1 ± 2.6 | 52.6 ± 1.6 | 83.6 ± 2.5 | 62.9 ± 2.0 |               |                                                     |      |       |       |       |      |
| K <sub>167</sub>                                                          | Y <sub>390</sub>                                                                                                                                              | 9E                                  | 43.5 ± 2.0 | 50.7 ± 3.0 | 32.6 ± 2.5 | 55.3 ± 1.6 | 83.4 ± 1.9 | 65.0 ± 2.2 |               |                                                     |      |       |       |       |      |
| K <sub>167</sub>                                                          | T <sub>397</sub>                                                                                                                                              |                                     | 40.4 ± 1.3 | 50.7 ± 2.1 | 37.5 ± 1.5 | 60.3 ± 0.7 | 88.3 ± 1.4 | 62.2 ± 1.5 |               |                                                     |      |       |       |       |      |
| <b>Double digestion GluC&amp;AspN</b>                                     |                                                                                                                                                               |                                     |            |            |            |            |            |            | ≤5 %          | ≤10%                                                | ≤20% | ≤25 % | ≤35 % | ≤60%  |      |
| DAIK <sub>147</sub> AALA                                                  | DVALS <sub>376</sub> S <sub>377</sub> GS <sub>379</sub> ACT <sub>382</sub> S <sub>383</sub> AS <sub>385</sub><br>LEPS <sub>389</sub> Y <sub>390</sub> VLRAIGT |                                     |            |            |            |            |            |            | 3             | 2                                                   | 1    |       |       |       |      |
| K <sub>147</sub>                                                          | S <sub>376</sub>                                                                                                                                              |                                     | 24.3±1.1   | 40.2±1.9   | 30.7±0.6   | 56.2±1.8   | 72.8±2.4   | 52.9±1.0   |               |                                                     |      |       |       |       |      |
| K <sub>147</sub>                                                          | S <sub>377</sub>                                                                                                                                              |                                     | 26.4±1.5   | 44.1±1.6   | 29.2±1.5   | 55.2±1.7   | 77.1±1.5   | 55.7±1.4   |               |                                                     |      |       |       |       |      |
| K <sub>147</sub>                                                          | S <sub>379</sub>                                                                                                                                              |                                     | 30.3±1.4   | 48.5±2.1   | 25.9±1.0   | 52.3±1.3   | 79.1±2.4   | 59.4±0.9   |               |                                                     |      |       |       |       |      |
| K <sub>147</sub>                                                          | T <sub>382</sub>                                                                                                                                              |                                     | 28.8±1.4   | 48.0±1.5   | 21.1±1.6   | 46.4±2.0   | 79.9±2.6   | 57.3±0.6   |               |                                                     |      |       |       |       |      |
| K <sub>147</sub>                                                          | S <sub>383</sub>                                                                                                                                              | 9E                                  | 31.6±1.6   | 49.4±1.6   | 19.7±1.6   | 45.1±1.6   | 78.9±2.3   | 59.7±0.8   |               |                                                     |      |       |       |       |      |
| K <sub>147</sub>                                                          | S <sub>385</sub>                                                                                                                                              | 14F                                 | 37.2±1.3   | 55.1±1.6   | 17.6±1.7   | 42.9±1.9   | 82.4±1.5   | 65.5±1.0   |               |                                                     |      |       |       |       |      |
| K <sub>147</sub>                                                          | S <sub>389</sub>                                                                                                                                              |                                     | 36.2±0.9   | 53.7±1.8   | 26.5±1.7   | 51.2±1.0   | 81.4±2.0   | 65.3±1.2   |               |                                                     |      |       |       |       |      |
| K <sub>147</sub>                                                          | Y <sub>390</sub>                                                                                                                                              |                                     | 38.4±1.1   | 54.7±1.8   | 28.5±0.9   | 53.6±0.8   | 82.8±1.3   | 67.3±1.3   |               |                                                     |      |       |       |       |      |
|                                                                           |                                                                                                                                                               |                                     |            |            |            |            |            |            | ≤5 %          | ≤10%                                                | ≤20% | ≤25 % | ≤35 % | ≤60%  |      |
| ALT <sub>119</sub> IK <sub>121</sub> NT <sub>123</sub>                    | DLK <sub>450</sub> S <sub>451</sub> IK <sub>453</sub> WT <sub>455</sub> QH-c                                                                                  |                                     |            |            |            |            |            |            | 2             | 1                                                   | 1    |       |       |       |      |
| T <sub>119</sub>                                                          | K <sub>450</sub>                                                                                                                                              |                                     | 27.6±1.8   | 49.5±2.2   | 37.2±1.6   | 61.5±2.6   | 88.4±2.4   | 32.9±2.3   |               |                                                     |      |       |       |       |      |
| K <sub>121</sub>                                                          | K <sub>450</sub>                                                                                                                                              | 9E                                  | 24.9±2.4   | 55.7±2.2   | 32.0±1.5   | 66.4±2.2   | 80.5±2.8   | 37.7±2.4   |               |                                                     |      |       |       |       |      |
| T <sub>123</sub>                                                          | K <sub>450</sub>                                                                                                                                              |                                     | 26.8±2.2   | 59.9±2.4   | 27.6±1.7   | 68.8±2.1   | 77.2±2.6   | 37.8±2.1   |               |                                                     |      |       |       |       |      |
| T <sub>119</sub>                                                          | K <sub>453</sub>                                                                                                                                              |                                     | 24.8±2.7   | 48.0±2.8   | 31.5±2.1   | 55.3±2.4   | 81.3±2.8   | 33.0±1.9   |               |                                                     |      |       |       |       |      |
| K <sub>121</sub>                                                          | K <sub>453</sub>                                                                                                                                              | 9E                                  | 20.5±2.9   | 53.7±2.8   | 26.7±2.1   | 61.0±2.4   | 76.7±2.4   | 36.6±2.2   |               |                                                     |      |       |       |       |      |
| T <sub>123</sub>                                                          | K <sub>453</sub>                                                                                                                                              |                                     | 21.5±2.8   | 57.2±2.7   | 21.9±2.1   | 64.3±2.9   | 73.4±2.8   | 36.8±2.3   |               |                                                     |      |       |       |       |      |
| K <sub>121</sub>                                                          | S <sub>451</sub>                                                                                                                                              |                                     | 23.5±2.0   | 54.5±2.1   | 30.1±1.2   | 64.0±1.4   | 79.2±2.7   | 35.9±2.5   |               |                                                     |      |       |       |       |      |
| K <sub>121</sub>                                                          | T <sub>455</sub>                                                                                                                                              |                                     | 19.2±3.2   | 51.9±2.3   | 22.3±1.8   | 61.6±2.5   | 74.7±2.4   | 41.5±2.8   |               |                                                     |      |       |       |       |      |
|                                                                           |                                                                                                                                                               |                                     |            |            |            |            |            |            | ≤5 %          | ≤10%                                                | ≤20% | ≤25 % | ≤35 % | ≤60%  |      |
| *PK <sub>160</sub> K <sub>161</sub> GE                                    | RLIQNIMK <sub>335</sub> S <sub>336</sub> LP                                                                                                                   |                                     |            |            |            |            |            |            | 2             | 2                                                   |      |       |       |       |      |
| K <sub>160</sub>                                                          | K <sub>335</sub>                                                                                                                                              |                                     | 42.8±2.1   | 38.4±1.9   | 66.9±1.1   | 77.0±1.2   | 97.1±1.5   | 47.4±1.5   |               |                                                     |      |       |       |       |      |
| K <sub>160</sub>                                                          | S <sub>336</sub>                                                                                                                                              |                                     | 40.0±2.3   | 36.3±2.1   | 66.8±1.0   | 76.6±1.1   | 97.2±1.7   | 44.9±1.5   |               |                                                     |      |       |       |       |      |
| K <sub>161</sub>                                                          | K <sub>335</sub>                                                                                                                                              |                                     | 44.3±2.0   | 41.6±1.9   | 67.9±1.1   | 75.2±1.3   | 95.6±1.5   | 47.3±1.9   |               |                                                     |      |       |       |       |      |
| K <sub>161</sub>                                                          | S <sub>336</sub>                                                                                                                                              |                                     | 41.6±2.3   | 39.5±2.1   | 67.6±1.0   | 74.7±1.3   | 95.6±1.7   | 44.8±1.9   |               |                                                     |      |       |       |       |      |

Supplemental Table S2g, p.4

| Cross-linked peptides                                                                                                      |                                                                                    | Distances (Å) measured in structure |           |           |           |          |          |          | # of peptides | False Discovery Rate (FDR) of cross-linked peptides |      |      |       |       |       |      |
|----------------------------------------------------------------------------------------------------------------------------|------------------------------------------------------------------------------------|-------------------------------------|-----------|-----------|-----------|----------|----------|----------|---------------|-----------------------------------------------------|------|------|-------|-------|-------|------|
| ISCU                                                                                                                       | NFS1                                                                               | Figure                              | 2-fold #1 | 2-fold #2 | 2-fold #3 | 3-fold   | 4-fold   | C-term   |               | ≤5 %                                                | ≤10% | ≤20% | ≤25 % | ≤35 % | ≤60%  |      |
| DAIK <sub>147</sub> AALA                                                                                                   | DLK <sub>450</sub> S <sub>451</sub> IK <sub>453</sub> WT <sub>455</sub> QH-C       |                                     |           |           |           |          |          |          | 2             | 1                                                   |      | 1    |       |       |       |      |
| K <sub>147</sub>                                                                                                           | K <sub>450</sub>                                                                   | 9E                                  | 21.8±2.4  | 50.6±2.4  | 40.0±2.1  | 67.1±1.7 | 89.9±3.3 | 40.1±2.9 |               |                                                     |      |      |       |       |       |      |
| K <sub>147</sub>                                                                                                           | K <sub>453</sub>                                                                   | 9E                                  | 20.9±2.6  | 50.5±2.9  | 34.1±2.5  | 62.4±3.0 | 85.7±2.5 | 40.2±1.9 |               |                                                     |      |      |       |       |       |      |
| K <sub>147</sub>                                                                                                           | S <sub>451</sub>                                                                   |                                     | 21.9±1.9  | 50.8±2.2  | 38.0±1.7  | 65.3±2.2 | 88.0±2.8 | 39.2±2.9 |               |                                                     |      |      |       |       |       |      |
| K <sub>147</sub>                                                                                                           | T <sub>455</sub>                                                                   |                                     | 21.4±2.5  | 48.6±1.9  | 28.3±1.3  | 59.2±3.3 | 83.8±2.2 | 44.5±2.1 |               |                                                     |      |      |       |       |       |      |
|                                                                                                                            |                                                                                    |                                     |           |           |           |          |          |          |               |                                                     | ≤5 % | ≤10% | ≤20%  | ≤25 % | ≤35 % | ≤60% |
| DHY <sub>43</sub> ENPRNVGS <sub>51</sub> L                                                                                 | K <sub>425</sub> CIQHVK <sub>431</sub> RLRE                                        |                                     |           |           |           |          |          |          | 1             | 1                                                   |      |      |       |       |       |      |
| Y <sub>43</sub>                                                                                                            | K <sub>425</sub>                                                                   |                                     | NM        | NM        | NM        | NM       | NM       | NM       |               |                                                     |      |      |       |       |       |      |
| S <sub>51</sub>                                                                                                            | K <sub>425</sub>                                                                   | 9E                                  | 7.3±1.2   | 40.2±1.0  | 54.7±1.8  | 76.4±1.3 | 84.8±1.6 | 38.9±1.5 |               |                                                     |      |      |       |       |       |      |
| Y <sub>43</sub>                                                                                                            | K <sub>431</sub>                                                                   |                                     | NM        | NM        | NM        | NM       | NM       | NM       |               |                                                     |      |      |       |       |       |      |
| S <sub>51</sub>                                                                                                            | K <sub>431</sub>                                                                   |                                     | 14.7±1.6  | 47.8±1.2  | 51.8±1.6  | 77.2±1.8 | 94.9±1.7 | 38.6±1.4 |               |                                                     |      |      |       |       |       |      |
|                                                                                                                            |                                                                                    |                                     |           |           |           |          |          |          |               |                                                     | ≤5 % | ≤10% | ≤20%  | ≤25 % | ≤35 % | ≤60% |
| *DK <sub>54</sub> T <sub>55</sub> S <sub>56</sub> K <sub>57</sub> NVGT <sub>61</sub> GLVGAPACGDVM<br>K <sub>74</sub> LQIQV | DVNDMK <sub>248</sub> I                                                            |                                     |           |           |           |          |          |          | 1             |                                                     |      | 1    |       |       |       |      |
| K <sub>54</sub>                                                                                                            | K <sub>248</sub>                                                                   |                                     | 49.6±0.9  | 61.1±1.3  | 65.5±2.7  | 64.0±2.4 | 74.7±2.1 | 68.6±1.4 |               |                                                     |      |      |       |       |       |      |
| T <sub>55</sub>                                                                                                            | K <sub>248</sub>                                                                   |                                     | 47.8±0.7  | 61.7±1.3  | 65.9±2.4  | 61.8±2.4 | 72.5±1.5 | 66.9±1.3 |               |                                                     |      |      |       |       |       |      |
| S <sub>56</sub>                                                                                                            | K <sub>248</sub>                                                                   |                                     | 49.4±1.1  | 59.3±1.4  | 64.3±2.6  | 62.9±2.4 | 73.4±1.8 | 65.3±1.4 |               |                                                     |      |      |       |       |       |      |
| K <sub>57</sub>                                                                                                            | K <sub>248</sub>                                                                   |                                     | 52.4±1.3  | 55.7±1.4  | 61.7±2.6  | 66.4±2.4 | 75.8±1.8 | 65.7±1.4 |               |                                                     |      |      |       |       |       |      |
| T <sub>61</sub>                                                                                                            | K <sub>248</sub>                                                                   |                                     | 52.3±1.1  | 48.2±1.6  | 50.9±2.7  | 71.6±1.8 | 72.4±1.8 | 75.6±1.7 |               |                                                     |      |      |       |       |       |      |
| K <sub>74</sub>                                                                                                            | K <sub>248</sub>                                                                   |                                     | 50.7±1.2  | 46.7±1.8  | 45.2±2.3  | 72.7±1.5 | 68.7±1.7 | 82.5±1.7 |               |                                                     |      |      |       |       |       |      |
|                                                                                                                            |                                                                                    |                                     |           |           |           |          |          |          |               |                                                     | ≤5 % | ≤10% | ≤20%  | ≤25 % | ≤35 % | ≤60% |
| *DK <sub>54</sub> T <sub>55</sub> S <sub>56</sub> K <sub>57</sub> NVGT <sub>61</sub> GLVGAPACG                             | IGVK <sub>212</sub> QPIAE                                                          |                                     |           |           |           |          |          |          | 1             |                                                     |      | 1    |       |       |       |      |
| K <sub>54</sub>                                                                                                            | K <sub>212</sub>                                                                   | 9E                                  | 35.9±0.8  | 50.5±1.2  | 60.4±2.4  | 63.6±2.1 | 81.4±2.1 | 55.2±1.1 |               |                                                     |      |      |       |       |       |      |
| T <sub>55</sub>                                                                                                            | K <sub>212</sub>                                                                   |                                     | 34.5±0.6  | 51.2±1.2  | 60.5±2.1  | 61.0±1.9 | 79.2±1.6 | 53.5±1.0 |               |                                                     |      |      |       |       |       |      |
| S <sub>56</sub>                                                                                                            | K <sub>212</sub>                                                                   |                                     | 36.2±0.9  | 48.6±1.4  | 60.1±2.6  | 62.0±1.9 | 79.6±2.0 | 52.3±1.1 |               |                                                     |      |      |       |       |       |      |
| K <sub>57</sub>                                                                                                            | K <sub>212</sub>                                                                   |                                     | 38.9±0.8  | 44.9±1.4  | 58.1±2.4  | 65.2±1.9 | 81.4±2.1 | 53.2±1.1 |               |                                                     |      |      |       |       |       |      |
| T <sub>61</sub>                                                                                                            | K <sub>212</sub>                                                                   |                                     | 37.6±0.3  | 40.3±1.8  | 46.0±2.4  | 71.8±0.8 | 75.9±2.1 | 63.9±1.3 |               |                                                     |      |      |       |       |       |      |
|                                                                                                                            |                                                                                    |                                     |           |           |           |          |          |          |               |                                                     | ≤5 % | ≤10% | ≤20%  | ≤25 % | ≤35 % | ≤60% |
| LCLPPVK <sub>135</sub> LHCSMLAEDAIAIK <sub>147</sub> AALA                                                                  | DLAHS <sub>404</sub> S <sub>405</sub> IRFGIGRFT <sub>414</sub> T <sub>415</sub> EE |                                     |           |           |           |          |          |          | 1             |                                                     |      | 1    |       |       |       |      |
| K <sub>135</sub>                                                                                                           | S <sub>404</sub>                                                                   | 9E,F                                | 19.4±2.5  | 60.5±1.0  | 19.0±2.8  | 68.8±2.4 | 65.1±1.6 | 68.4±1.4 |               |                                                     |      |      |       |       |       |      |
| K <sub>135</sub>                                                                                                           | S <sub>405</sub>                                                                   |                                     | 22.3±1.4  | 59.1±0.9  | 21.3±2.3  | 69.2±2.2 | 63.6±1.7 | 70.4±1.2 |               |                                                     |      |      |       |       |       |      |
| K <sub>135</sub>                                                                                                           | T <sub>414</sub>                                                                   |                                     | 33.9±1.3  | 43.1±1.7  | 35.2±0.8  | 81.5±1.8 | 47.1±1.1 | 63.8±1.2 |               |                                                     |      |      |       |       |       |      |
| K <sub>135</sub>                                                                                                           | T <sub>415</sub>                                                                   |                                     | 37.0±1.5  | 42.8±2.0  | 38.4±0.8  | 85.1±1.9 | 46.6±1.3 | 63.1±1.2 |               |                                                     |      |      |       |       |       |      |
| K <sub>147</sub>                                                                                                           | S <sub>404</sub>                                                                   | 9E                                  | 25.5±1.6  | 46.8±1.3  | 31.2±1.1  | 58.9±1.9 | 81.4±1.9 | 54.3±1.5 |               |                                                     |      |      |       |       |       |      |
| K <sub>147</sub>                                                                                                           | S <sub>405</sub>                                                                   |                                     | 26.6±0.9  | 45.8±1.2  | 33.1±0.7  | 60.3±1.5 | 79.7±1.8 | 55.7±1.5 |               |                                                     |      |      |       |       |       |      |
| K <sub>147</sub>                                                                                                           | T <sub>414</sub>                                                                   | 9E                                  | 24.5±0.9  | 27.7±1.2  | 51.6±1.0  | 76.3±1.1 | 64.2±1.2 | 45.8±1.4 |               |                                                     |      |      |       |       |       |      |
| K <sub>147</sub>                                                                                                           | T <sub>415</sub>                                                                   |                                     | 25.8±0.8  | 27.1±1.4  | 55.1±1.0  | 80.0±1.1 | 63.9±1.2 | 44.7±1.5 |               |                                                     |      |      |       |       |       |      |
|                                                                                                                            |                                                                                    |                                     |           |           |           |          |          |          |               |                                                     | ≤5 % | ≤10% | ≤20%  | ≤25 % | ≤35 % | ≤60% |
| ALT <sub>119</sub> IK <sub>121</sub> NT <sub>123</sub> DIAK <sub>127</sub> E                                               | S <sub>99</sub> EAAAME                                                             |                                     |           |           |           |          |          |          | 1             |                                                     |      | 1    |       |       |       |      |
| K <sub>121</sub>                                                                                                           | S <sub>99</sub>                                                                    |                                     | 36.0±1.1  | 25.3±1.9  | 52.6±2.4  | 62.1±1.3 | 27.2±3.3 | 55.0±1.5 |               |                                                     |      |      |       |       |       |      |
| K <sub>127</sub>                                                                                                           | S <sub>99</sub>                                                                    | 9E                                  | 32.9±1.7  | 31.3±2.2  | 54.6±2.2  | 56.9±1.6 | 20.1±2.3 | 63.0±1.8 |               |                                                     |      |      |       |       |       |      |

Supplemental Table S2g, p.5

| Cross-linked peptides                 |                                                                                              | Figure | Distances (Å) measured in structure |            |            |            |            |            | # of peptides | False Discovery Rate (FDR) of cross-linked peptides |      |      |       |       |      |
|---------------------------------------|----------------------------------------------------------------------------------------------|--------|-------------------------------------|------------|------------|------------|------------|------------|---------------|-----------------------------------------------------|------|------|-------|-------|------|
| ISCU                                  | NFS1                                                                                         |        | 2-fold #1                           | 2-fold #2  | 2-fold #3  | 3-fold     | 4-fold     | C-term     |               | ≤5 %                                                | ≤10% | ≤20% | ≤25 % | ≤35 % | ≤60% |
| K <sub>82</sub> GK <sub>84</sub> V    | DVVMNGDPK <sub>347</sub> HHY <sub>350</sub> PGCINL<br>S <sub>357</sub> FAY <sub>360</sub> VE |        |                                     |            |            |            |            |            |               |                                                     |      | 1    |       | 1     |      |
| K <sub>82</sub>                       | K <sub>347</sub>                                                                             |        | 34.5±1.8                            | 49.3±2.2   | 67.2±1.4   | 64.7±0.8   | 79.5±1.8   | 47.6±1.4   |               |                                                     |      |      |       |       |      |
| K <sub>82</sub>                       | Y <sub>350</sub>                                                                             |        | 30.2±1.0                            | 45.9±1.4   | 61.5±1.2   | 58.4±0.7   | 73.7±1.3   | 44.3±0.9   |               |                                                     |      |      |       |       |      |
| K <sub>82</sub>                       | S <sub>357</sub>                                                                             |        | 34.5±1.5                            | 50.4±1.6   | 50.9±0.9   | 51.2±1.4   | 87.8±1.4   | 42.3±1.4   |               |                                                     |      |      |       |       |      |
| K <sub>82</sub>                       | Y <sub>360</sub>                                                                             |        | 41.6±1.1                            | 56.9±1.1   | 49.7±1.4   | 52.0±2.5   | 97.6±1.6   | 46.8±1.0   |               |                                                     |      |      |       |       |      |
| K <sub>84</sub>                       | K <sub>347</sub>                                                                             |        | 28.1±1.6                            | 53.1±2.3   | 64.1±1.9   | 63.5±0.6   | 73.2±1.9   | 52.9±1.4   |               |                                                     |      |      |       |       |      |
| K <sub>84</sub>                       | Y <sub>350</sub>                                                                             | 9E     | 23.5±0.9                            | 49.7±1.5   | 58.8±1.7   | 57.0±0.7   | 67.7±1.4   | 49.9±0.9   |               |                                                     |      |      |       |       |      |
| K <sub>84</sub>                       | S <sub>357</sub>                                                                             |        | 27.7±1.4                            | 56.0±1.5   | 47.0±1.1   | 51.5±2.0   | 82.3±1.7   | 45.9±1.4   |               |                                                     |      |      |       |       |      |
| K <sub>84</sub>                       | Y <sub>360</sub>                                                                             |        | 35.8±1.3                            | 62.9±1.0   | 45.0±1.2   | 54.0±2.9   | 92.2±1.7   | 49.1±1.1   |               |                                                     |      |      |       |       |      |
|                                       |                                                                                              |        |                                     |            |            |            |            |            |               | 1                                                   |      | 1    |       |       |      |
| PK <sub>160</sub> K <sub>161</sub> GE | DHK <sub>320</sub> RIS <sub>323</sub> K <sub>324</sub> LSERLIQNIMK <sub>335</sub><br>SLP     |        |                                     |            |            |            |            |            |               | 1                                                   |      |      | 1     |       |      |
| K <sub>160</sub>                      | K <sub>320</sub>                                                                             |        | 42.7 ± 1.1                          | 32.8 ± 1.2 | 71.3 ± 0.8 | 81.9 ± 0.7 | 77.4 ± 2.0 | 42.3 ± 1.4 |               |                                                     |      |      |       |       |      |
| K <sub>160</sub>                      | S <sub>323</sub>                                                                             |        | 41.6 ± 1.4                          | 32.2 ± 1.3 | 67.6 ± 0.7 | 78.2 ± 0.8 | 80.6 ± 1.6 | 42.5 ± 1.6 |               |                                                     |      |      |       |       |      |
| K <sub>160</sub>                      | K <sub>324</sub>                                                                             |        | 40.8 ± 1.2                          | 31.9 ± 1.2 | 70.2 ± 0.6 | 80.7 ± 0.7 | 82.4 ± 1.8 | 41.9 ± 1.4 |               |                                                     |      |      |       |       |      |
| K <sub>160</sub>                      | K <sub>335</sub>                                                                             |        | 42.8±2.1                            | 38.4±1.9   | 66.9±1.1   | 77.0±1.2   | 97.1±1.5   | 47.4±1.5   |               |                                                     |      |      |       |       |      |
| K <sub>161</sub>                      | K <sub>320</sub>                                                                             |        | 42.7 ± 1.2                          | 35.9 ± 1.3 | 71.9 ± 0.7 | 79.6 ± 0.5 | 76.2 ± 2.1 | 42.5 ± 1.8 |               |                                                     |      |      |       |       |      |
| K <sub>161</sub>                      | S <sub>323</sub>                                                                             |        | 41.8 ± 1.5                          | 35.5 ± 1.4 | 68.3 ± 0.8 | 75.9 ± 0.6 | 79.2 ± 1.7 | 42.4 ± 2.1 |               |                                                     |      |      |       |       |      |
| K <sub>161</sub>                      | K <sub>324</sub>                                                                             |        | 41.3 ± 1.3                          | 35.4 ± 1.3 | 70.8 ± 0.7 | 78.4 ± 0.6 | 81.1 ± 1.8 | 42.1 ± 1.8 |               |                                                     |      |      |       |       |      |
| K <sub>161</sub>                      | K <sub>335</sub>                                                                             |        | 44.1±1.9                            | 41.6±1.9   | 67.9±1.1   | 75.2±1.3   | 95.6±1.5   | 47.3±1.9   |               |                                                     |      |      |       |       |      |

Supplemental Table S2h, p.1

| Cross-linked peptides                                      |                                                | Figure | Distances (Å) measured in structure<br>FXN <sup>42-210</sup> -ISD11 | # of peptides | False Discovery Rate (FDR) of cross-linked peptides |      |      |       |       |      |  |
|------------------------------------------------------------|------------------------------------------------|--------|---------------------------------------------------------------------|---------------|-----------------------------------------------------|------|------|-------|-------|------|--|
| FXN <sup>42-210</sup>                                      | ISD11                                          |        |                                                                     |               | ≤5 %                                                | ≤10% | ≤20% | ≤25 % | ≤35 % | ≤60% |  |
| <b>Single digestion GluC</b>                               |                                                |        |                                                                     |               |                                                     |      |      |       |       |      |  |
| *T <sub>93</sub> T <sub>94</sub> Y <sub>95</sub> ERLAE     |                                                |        |                                                                     |               |                                                     |      |      |       | 1     |      |  |
|                                                            | NK <sub>44</sub> NVK <sub>47</sub> DPVE        |        |                                                                     | 1             |                                                     |      |      |       |       |      |  |
| T <sub>93</sub>                                            | K <sub>44</sub>                                |        | 32.3 ± 0.1                                                          |               |                                                     |      |      |       |       |      |  |
| T <sub>94</sub>                                            | K <sub>44</sub>                                |        | 36.2 ± 0.7                                                          |               |                                                     |      |      |       |       |      |  |
| Y <sub>95</sub>                                            | K <sub>44</sub>                                |        | 38.7 ± 2.1                                                          |               |                                                     |      |      |       |       |      |  |
| T <sub>93</sub>                                            | K <sub>47</sub>                                |        | 33.9 ± 0.2                                                          |               |                                                     |      |      |       |       |      |  |
| T <sub>94</sub>                                            | K <sub>47</sub>                                |        | 37.5 ± 0.7                                                          |               |                                                     |      |      |       |       |      |  |
| Y <sub>95</sub>                                            | K <sub>47</sub>                                |        | 38.9 ± 0.6                                                          |               |                                                     |      |      |       |       |      |  |
|                                                            |                                                |        |                                                                     |               |                                                     |      |      |       |       |      |  |
|                                                            |                                                |        |                                                                     |               |                                                     |      |      |       |       |      |  |
| *ET <sub>102</sub> LDS <sub>105</sub> LAE                  |                                                |        |                                                                     |               |                                                     |      |      |       |       |      |  |
|                                                            | n-MAQVLS <sub>11</sub> LY <sub>13</sub> RAMLRE |        |                                                                     | 5             | 1                                                   |      |      |       | 1     | 3    |  |
| T <sub>102</sub>                                           | N-term                                         |        | 28.3 ± 0.1                                                          |               |                                                     |      |      |       |       |      |  |
| S <sub>105</sub>                                           | N-term                                         | 9G     | 28.6 ± 1.3                                                          |               |                                                     |      |      |       |       |      |  |
| <b>Double digestion GluC&amp;AspN</b>                      |                                                |        |                                                                     |               |                                                     |      |      |       |       |      |  |
| *LTK <sub>192</sub> ALK <sub>195</sub> TK <sub>197</sub> L |                                                |        |                                                                     |               |                                                     |      |      |       |       |      |  |
|                                                            | NK <sub>44</sub> NVK <sub>47</sub>             |        |                                                                     | 2             | 1                                                   |      |      | 1     |       |      |  |
| K <sub>192</sub>                                           | K <sub>44</sub>                                |        | 36.7 ± 1.3                                                          |               |                                                     |      |      |       |       |      |  |
| K <sub>192</sub>                                           | K <sub>47</sub>                                |        | 39.8 ± 1.3                                                          |               |                                                     |      |      |       |       |      |  |
| K <sub>195</sub>                                           | K <sub>44</sub>                                |        | 37.2 ± 1.3                                                          |               |                                                     |      |      |       |       |      |  |
| K <sub>195</sub>                                           | K <sub>47</sub>                                |        | 40.6 ± 1.1                                                          |               |                                                     |      |      |       |       |      |  |
| K <sub>197</sub>                                           | K <sub>44</sub>                                | 9G     | 33.7 ± 0.1                                                          |               |                                                     |      |      |       |       |      |  |
| K <sub>197</sub>                                           | K <sub>47</sub>                                |        | 37.7 ± 0.2                                                          |               |                                                     |      |      |       |       |      |  |
| T <sub>191</sub>                                           | K <sub>44</sub>                                |        | 36.8 ± 1.1                                                          |               |                                                     |      |      |       |       |      |  |
| T <sub>196</sub>                                           | K <sub>44</sub>                                |        | 36.0 ± 0.1                                                          |               |                                                     |      |      |       |       |      |  |
| T <sub>191</sub>                                           | K <sub>47</sub>                                |        | 40.3 ± 1.2                                                          |               |                                                     |      |      |       |       |      |  |
| T <sub>196</sub>                                           | K <sub>47</sub>                                |        | 39.7 ± 0.0                                                          |               |                                                     |      |      |       |       |      |  |

Supplemental Table S2h, p.2

| Cross-linked peptides                                                                         |                                         | Figure | Distances (Å) measured in structure | # of peptides | False Discovery Rate (FDR) of cross-linked peptides |      |      |       |       |      |
|-----------------------------------------------------------------------------------------------|-----------------------------------------|--------|-------------------------------------|---------------|-----------------------------------------------------|------|------|-------|-------|------|
| FXN <sup>42-210</sup>                                                                         | ISD11                                   |        | FXN <sup>42-210</sup> -ISD11        |               | ≤5 %                                                | ≤10% | ≤20% | ≤25 % | ≤35 % | ≤45% |
| <b>LOW SCORE PEPTIDE</b>                                                                      |                                         |        |                                     |               |                                                     |      |      |       |       |      |
| DATCTPRRASSNQRGLNQIWNVK <sub>69</sub> K <sub>70</sub> Q<br>SVYLMNLRK <sub>80</sub> SGTLGHPGSL | NK <sub>44</sub> NVK <sub>47</sub> DPVE |        |                                     | 2             |                                                     |      |      |       |       | 2    |
| T <sub>49</sub>                                                                               | K <sub>44</sub>                         |        | NM                                  |               |                                                     |      |      |       |       |      |
| K <sub>69</sub>                                                                               | K <sub>44</sub>                         | 9G     | 12.9 ± 1.4                          |               |                                                     |      |      |       |       |      |
| K <sub>70</sub>                                                                               | K <sub>44</sub>                         |        | 16.2 ± 1.6                          |               |                                                     |      |      |       |       |      |
| K <sub>80</sub>                                                                               | K <sub>44</sub>                         |        | 26.6 ± 1.1                          |               |                                                     |      |      |       |       |      |
| K <sub>69</sub>                                                                               | K <sub>47</sub>                         |        | 13.7 ± 1.8                          |               |                                                     |      |      |       |       |      |
| K <sub>70</sub>                                                                               | K <sub>47</sub>                         | 9G     | 16.6 ± 2.0                          |               |                                                     |      |      |       |       |      |
| K <sub>80</sub>                                                                               | K <sub>47</sub>                         |        | 31.1 ± 1.0                          |               |                                                     |      |      |       |       |      |

Supplemental Table S2h, p.3

| Cross-linked peptides                                                                                                            |                                                |        | Distances (Å) measured in structure |               | False Discovery Rate (FDR) of cross-linked peptides |      |      |       |       |      |
|----------------------------------------------------------------------------------------------------------------------------------|------------------------------------------------|--------|-------------------------------------|---------------|-----------------------------------------------------|------|------|-------|-------|------|
| ISCU                                                                                                                             | ISD11                                          | Figure | ISCU-ISD11                          | # of peptides | ≤5 %                                                | ≤10% | ≤20% | ≤25 % | ≤35 % | ≤60% |
| <b>Single digestion GluC</b>                                                                                                     |                                                |        |                                     |               | ≤5 %                                                | ≤10% | ≤20% | ≤25 % | ≤35 % | ≤60% |
| *PK <sub>160</sub> K <sub>161</sub> GE                                                                                           | NRDMPRT <sub>91</sub> -C                       |        |                                     | 1             |                                                     |      |      |       | 1     |      |
| K <sub>160</sub>                                                                                                                 | T <sub>91</sub>                                |        | 36.8 ± 0.7                          |               |                                                     |      |      |       |       |      |
| K <sub>161</sub>                                                                                                                 | T <sub>91</sub>                                | 9G     | 35.4 ± 1.1                          |               |                                                     |      |      |       |       |      |
|                                                                                                                                  |                                                |        |                                     |               | ≤5 %                                                | ≤10% | ≤20% | ≤25 % | ≤35 % | ≤60% |
| LCLPPVK <sub>135</sub> LHCS <sub>139</sub> MLAEDA <sub>147</sub> AALAD<br>Y <sub>153</sub> K <sub>154</sub> LK <sub>156</sub> QE | NK <sub>44</sub> NVK <sub>47</sub> DPVE        |        |                                     | 1             |                                                     |      |      |       | 1     |      |
| K <sub>135</sub>                                                                                                                 | K <sub>44</sub>                                |        | 33.0 ± 1.0                          |               |                                                     |      |      |       |       |      |
| S <sub>139</sub>                                                                                                                 | K <sub>44</sub>                                |        | 27.5 ± 2.9                          |               |                                                     |      |      |       |       |      |
| K <sub>147</sub>                                                                                                                 | K <sub>44</sub>                                | 9G     | 21.9 ± 3.0                          |               |                                                     |      |      |       |       |      |
| Y <sub>153</sub>                                                                                                                 | K <sub>44</sub>                                |        | 16.4 ± 2.9                          |               |                                                     |      |      |       |       |      |
| K <sub>154</sub>                                                                                                                 | K <sub>44</sub>                                |        | 20.1 ± 3.0                          |               |                                                     |      |      |       |       |      |
| K <sub>156</sub>                                                                                                                 | K <sub>44</sub>                                |        | 18.2 ± 3.3                          |               |                                                     |      |      |       |       |      |
| K <sub>135</sub>                                                                                                                 | K <sub>47</sub>                                |        | 36.4 ± 4.1                          |               |                                                     |      |      |       |       |      |
| S <sub>139</sub>                                                                                                                 | K <sub>47</sub>                                |        | 29.2 ± 3.0                          |               |                                                     |      |      |       |       |      |
| K <sub>147</sub>                                                                                                                 | K <sub>47</sub>                                |        | 23.6 ± 3.4                          |               |                                                     |      |      |       |       |      |
| Y <sub>153</sub>                                                                                                                 | K <sub>47</sub>                                |        | 17.9 ± 3.4                          |               |                                                     |      |      |       |       |      |
| K <sub>154</sub>                                                                                                                 | K <sub>47</sub>                                |        | 21.4 ± 3.7                          |               |                                                     |      |      |       |       |      |
| K <sub>156</sub>                                                                                                                 | K <sub>47</sub>                                | 9G     | 18.9 ± 4.0                          |               | ≤5 %                                                | ≤10% | ≤20% | ≤25 % | ≤35 % | ≤60% |
| ALT <sub>119</sub> IK <sub>121</sub> NT <sub>123</sub> DIAK <sub>127</sub> ELCLPPVK <sub>135</sub> LH<br>CS <sub>139</sub> MLAE  | n-MAQVLS <sub>11</sub> LY <sub>13</sub> RAMLRE |        |                                     | 1             |                                                     |      |      |       | 1     |      |
| K <sub>121</sub>                                                                                                                 | N-term                                         | 9G     | 24.0 ± 0.7                          |               |                                                     |      |      |       |       |      |
| K <sub>121</sub>                                                                                                                 | S <sub>11</sub>                                |        | 29.3 ± 0.8                          |               |                                                     |      |      |       |       |      |
| K <sub>121</sub>                                                                                                                 | Y <sub>13</sub>                                |        | 30.1 ± 1.1                          |               |                                                     |      |      |       |       |      |
| K <sub>127</sub>                                                                                                                 | N-term                                         | 9G     | 24.7 ± 1.8                          |               |                                                     |      |      |       |       |      |
| K <sub>127</sub>                                                                                                                 | S <sub>11</sub>                                |        | 29.3 ± 1.6                          |               |                                                     |      |      |       |       |      |
| K <sub>127</sub>                                                                                                                 | Y <sub>13</sub>                                |        | 29.4 ± 1.6                          |               |                                                     |      |      |       |       |      |
| K <sub>135</sub>                                                                                                                 | N-term                                         |        | 35.5 ± 1.1                          |               |                                                     |      |      |       |       |      |
| K <sub>135</sub>                                                                                                                 | S <sub>11</sub>                                |        | 40.0 ± 1.4                          |               |                                                     |      |      |       |       |      |
| K <sub>135</sub>                                                                                                                 | Y <sub>13</sub>                                |        | 39.4 ± 1.8                          |               |                                                     |      |      |       |       |      |



Supplemental Table S2h, p.4

| Cross-linked peptides                 |                                                |        | Distances (Å) measured in structure |               | False Discovery Rate (FDR) of cross-linked peptides |      |      |       |       |      |
|---------------------------------------|------------------------------------------------|--------|-------------------------------------|---------------|-----------------------------------------------------|------|------|-------|-------|------|
| ISCU                                  | ISD11                                          | Figure | ISCU-ISD11                          | # of peptides | ≤5 %                                                | ≤10% | ≤20% | ≤25 % | ≤35 % | ≤60% |
| PK <sub>160</sub> K <sub>161</sub> GE | n-MAQVLS <sub>11</sub> LY <sub>13</sub> RAMLRE |        |                                     | 3             |                                                     |      |      |       |       | 3    |
| K <sub>160</sub>                      | N-term                                         | 9G     | 15.5 ± 3.0                          |               |                                                     |      |      |       |       |      |
| K <sub>160</sub>                      | S <sub>11</sub>                                |        | 20.7 ± 2.6                          |               |                                                     |      |      |       |       |      |
| K <sub>160</sub>                      | Y <sub>13</sub>                                |        | 23.6 ± 2.2                          |               |                                                     |      |      |       |       |      |
| K <sub>161</sub>                      | N-term                                         |        | 18.7 ± 3.0                          |               |                                                     |      |      |       |       |      |
| K <sub>161</sub>                      | S <sub>11</sub>                                |        | 24.1 ± 2.6                          |               |                                                     |      |      |       |       |      |
| K <sub>161</sub>                      | Y <sub>13</sub>                                |        | 27.1 ± 2.3                          |               |                                                     |      |      |       |       |      |

Supplemental Table S2h, p.5

| Cross-linked peptides                                                                                            |                                                                                                                                                                                                                             |        | Distances (Å) measured in structure |               | False Discovery Rate (FDR) of cross-linked peptides |      |      |       |       |      |
|------------------------------------------------------------------------------------------------------------------|-----------------------------------------------------------------------------------------------------------------------------------------------------------------------------------------------------------------------------|--------|-------------------------------------|---------------|-----------------------------------------------------|------|------|-------|-------|------|
| ISD11                                                                                                            | NFS1                                                                                                                                                                                                                        | Figure | ISD11-NFS1                          | # of peptides | ≤5 %                                                | ≤10% | ≤20% | ≤25 % | ≤35 % | ≤60% |
| <b>Single digestion GluC</b>                                                                                     |                                                                                                                                                                                                                             |        |                                     |               | ≤5 %                                                | ≤10% | ≤20% | ≤25 % | ≤35 % | ≤60% |
| NRDMPRT <sub>91</sub> -C                                                                                         | S <sub>365</sub> LLMALK <sub>371</sub> DVALS <sub>376</sub> S <sub>377</sub> G<br>S <sub>379</sub> ACT <sub>382</sub> S <sub>383</sub> AS <sub>385</sub> LEP<br>S <sub>389</sub> Y <sub>390</sub> VLRAIGT <sub>397</sub> DE |        |                                     | 2             |                                                     |      | 2    |       |       |      |
| T <sub>91</sub> C-term                                                                                           | K <sub>371</sub>                                                                                                                                                                                                            | 9G     | 14.7 ± 1.3                          |               |                                                     |      |      |       |       |      |
|                                                                                                                  |                                                                                                                                                                                                                             |        |                                     |               | ≤5 %                                                | ≤10% | ≤20% | ≤25 % | ≤35 % | ≤60% |
| *SK <sub>21</sub> RFS <sub>24</sub> AY <sub>26</sub> NY <sub>28</sub> RT <sub>30</sub> Y <sub>31</sub> AVRRIRDAF | RARQQVAS <sub>112</sub> LIGADPRE                                                                                                                                                                                            |        |                                     | 1             |                                                     |      |      | 1     |       |      |
| K <sub>21</sub>                                                                                                  | S <sub>112</sub>                                                                                                                                                                                                            | 9G     | 30.9 ± 0.6                          |               |                                                     |      |      |       |       |      |
| <b>Double digestion GluC&amp;AspN</b>                                                                            |                                                                                                                                                                                                                             |        |                                     |               | ≤5 %                                                | ≤10% | ≤20% | ≤25 % | ≤35 % | ≤60% |
| ISD11                                                                                                            | NFS1                                                                                                                                                                                                                        |        |                                     |               | ≤5 %                                                | ≤10% | ≤20% | ≤25 % | ≤35 % | ≤60% |
| NK <sub>44</sub> NVK <sub>47</sub>                                                                               | Y <sub>317</sub> DHK <sub>320</sub> RIS <sub>323</sub> K <sub>324</sub> LSERLIQ<br>NIMK <sub>335</sub> SLP                                                                                                                  |        |                                     | 4             | 1                                                   |      | 3    |       |       |      |
| K <sub>44</sub>                                                                                                  | Y <sub>317</sub>                                                                                                                                                                                                            |        | 32.6±0.1                            |               |                                                     |      |      |       |       |      |
| K <sub>44</sub>                                                                                                  | K <sub>320</sub>                                                                                                                                                                                                            |        | 30.5±0.4                            |               |                                                     |      |      |       |       |      |
| K <sub>44</sub>                                                                                                  | S <sub>323</sub>                                                                                                                                                                                                            |        | 27.0±1.0                            |               |                                                     |      |      |       |       |      |
| K <sub>44</sub>                                                                                                  | K <sub>324</sub>                                                                                                                                                                                                            |        | 25.4±0.8                            |               |                                                     |      |      |       |       |      |
| K <sub>44</sub>                                                                                                  | K <sub>335</sub>                                                                                                                                                                                                            | 9G     | 19.8±0.6                            |               |                                                     |      |      |       |       |      |
| K <sub>47</sub>                                                                                                  | Y <sub>317</sub>                                                                                                                                                                                                            |        | 37.7±0.0                            |               |                                                     |      |      |       |       |      |
| K <sub>47</sub>                                                                                                  | K <sub>320</sub>                                                                                                                                                                                                            |        | 35.6±0.4                            |               |                                                     |      |      |       |       |      |
| K <sub>47</sub>                                                                                                  | S <sub>323</sub>                                                                                                                                                                                                            |        | 32.7±1.0                            |               |                                                     |      |      |       |       |      |
| K <sub>47</sub>                                                                                                  | K <sub>324</sub>                                                                                                                                                                                                            |        | 30.5±0.8                            |               |                                                     |      |      |       |       |      |
| K <sub>47</sub>                                                                                                  | K <sub>335</sub>                                                                                                                                                                                                            | 9G     | 23.2±0.6                            |               |                                                     |      |      |       |       |      |
|                                                                                                                  |                                                                                                                                                                                                                             |        |                                     |               | ≤5 %                                                | ≤10% | ≤20% | ≤25 % | ≤35 % | ≤60% |
| DK <sub>80</sub> LIIE                                                                                            | DVALS <sub>376</sub> S <sub>377</sub> GS <sub>379</sub> ACT <sub>382</sub> S <sub>383</sub><br>AS <sub>385</sub> LEP S <sub>389</sub> Y <sub>390</sub> VLRAIGT                                                              |        |                                     | 1             | 1                                                   |      |      |       |       |      |
| K <sub>80</sub>                                                                                                  | S <sub>376</sub>                                                                                                                                                                                                            |        | 32.4±1.8                            |               |                                                     |      |      |       |       |      |
| K <sub>80</sub>                                                                                                  | S <sub>377</sub>                                                                                                                                                                                                            |        | 34.4±0.1                            |               |                                                     |      |      |       |       |      |
| K <sub>80</sub>                                                                                                  | S <sub>379</sub>                                                                                                                                                                                                            |        | 34.9±0.6                            |               |                                                     |      |      |       |       |      |
| K <sub>80</sub>                                                                                                  | T <sub>382</sub>                                                                                                                                                                                                            |        | 39.5±2.3                            |               |                                                     |      |      |       |       |      |
| K <sub>80</sub>                                                                                                  | S <sub>383</sub>                                                                                                                                                                                                            |        | 39.8±0.1                            |               |                                                     |      |      |       |       |      |
| K <sub>80</sub>                                                                                                  | S <sub>385</sub>                                                                                                                                                                                                            |        | 36.6±0.8                            |               |                                                     |      |      |       |       |      |
| K <sub>80</sub>                                                                                                  | S <sub>389</sub>                                                                                                                                                                                                            |        | 32.3±0.4                            |               |                                                     |      |      |       |       |      |
| K <sub>80</sub>                                                                                                  | Y <sub>390</sub>                                                                                                                                                                                                            | 9G     | 30.4±2.6                            |               |                                                     |      |      |       |       |      |

Supplemental Table S2h, p.6

| Cross-linked peptides                          |                                                                                           |        | Distances (Å) measured in structure |               | False Discovery Rate (FDR) of cross-linked peptides |      |      |       |       |      |
|------------------------------------------------|-------------------------------------------------------------------------------------------|--------|-------------------------------------|---------------|-----------------------------------------------------|------|------|-------|-------|------|
| ISD11                                          | NFS1                                                                                      | Figure | ISD11-NFS1                          | # of peptides | ≤5 %                                                | ≤10% | ≤20% | ≤25 % | ≤35 % | ≤60% |
| SK <sub>21</sub> RFSAYNYR <sub>TYAVRR</sub> IR | MEY <sub>317</sub>                                                                        |        |                                     | 1             | 1                                                   |      |      |       |       |      |
| K <sub>21</sub>                                | Y <sub>317</sub>                                                                          | 9G     | 10.5±1.1                            |               |                                                     |      |      |       |       |      |
|                                                |                                                                                           |        |                                     |               | ≤5 %                                                | ≤10% | ≤20% | ≤25 % | ≤35 % | ≤60% |
| DK <sub>80</sub> LIIIE                         | S <sub>365</sub> LLMALK <sub>371</sub>                                                    |        |                                     | 1             |                                                     |      | 1    |       |       |      |
| K <sub>80</sub>                                | S <sub>365</sub>                                                                          |        | 31.8±1.6                            |               |                                                     |      |      |       |       |      |
| K <sub>80</sub>                                | K <sub>371</sub>                                                                          |        | 31.5±1.3                            |               |                                                     |      |      |       |       |      |
|                                                |                                                                                           |        |                                     |               | ≤5 %                                                | ≤10% | ≤20% | ≤25 % | ≤35 % | ≤60% |
| DMPRT <sub>91-C</sub>                          | DVNDMK <sub>248</sub> l                                                                   |        |                                     | 1             |                                                     |      | 1    |       |       |      |
| T <sub>91</sub>                                | K <sub>248</sub>                                                                          | 9G     | 26.7±1.1                            |               |                                                     |      |      |       |       |      |
|                                                |                                                                                           |        |                                     |               | ≤5 %                                                | ≤10% | ≤20% | ≤25 % | ≤35 % | ≤60% |
| DMPRT <sub>91-C</sub>                          | DPK <sub>347</sub> HHY <sub>350</sub> PGCINLS <sub>357</sub> FA<br>Y <sub>360</sub> VE    |        |                                     | 1             |                                                     |      | 1    |       |       |      |
| T <sub>91</sub>                                | K <sub>347</sub>                                                                          | 9G     | 9.8±1.1                             |               |                                                     |      |      |       |       |      |
|                                                |                                                                                           |        |                                     |               | ≤5 %                                                | ≤10% | ≤20% | ≤25 % | ≤35 % | ≤60% |
| n-MAQVLS <sub>11</sub> LY <sub>13</sub> RAMLRE | RGMRS <sub>293</sub> GT <sub>295</sub> VPT <sub>298</sub> PLVVG<br>LGAACE                 |        |                                     | 1             |                                                     |      | 1    |       |       |      |
| N-term                                         | S <sub>293</sub>                                                                          |        | 26.5±0.4                            |               |                                                     |      |      |       |       |      |
| N-term                                         | T <sub>295</sub>                                                                          |        | 24.2±0.8                            |               |                                                     |      |      |       |       |      |
| N-term                                         | T <sub>298</sub>                                                                          |        | 21.2±1.6                            |               |                                                     |      |      |       |       |      |
|                                                |                                                                                           |        |                                     |               | ≤5 %                                                | ≤10% | ≤20% | ≤25 % | ≤35 % | ≤60% |
| NRDMPRT <sub>91-C</sub>                        | DHK <sub>320</sub> RIS <sub>323</sub> K <sub>324</sub> LSERLIQNIM<br>K <sub>335</sub> SLP |        |                                     | 1             |                                                     |      |      | 1     |       |      |
| T <sub>91</sub>                                | K <sub>320</sub>                                                                          | 9G     | 17.4±1.6                            |               |                                                     |      |      |       |       |      |
| T <sub>91</sub>                                | K <sub>324</sub>                                                                          |        | 13.5±0.5                            |               |                                                     |      |      |       |       |      |
| T <sub>91</sub>                                | K <sub>335</sub>                                                                          | 9G     | 11.8±0.2                            |               |                                                     |      |      |       |       |      |
|                                                |                                                                                           |        |                                     |               | ≤5 %                                                | ≤10% | ≤20% | ≤25 % | ≤35 % | ≤60% |
| DMPRT <sub>91-C</sub>                          | DAAQAVGK <sub>239</sub> lPLDVN                                                            |        |                                     | 1             |                                                     |      |      | 1     |       |      |
| T <sub>91</sub>                                | K <sub>239</sub>                                                                          | 9G     | 15.9±1.0                            |               |                                                     |      |      |       |       |      |

Shown are all of the FXN<sup>42-210</sup>-FXN<sup>42-210</sup> (Supplemental Table S2a), ISCU-ISCU (Supplemental Table S2b), NFS1-NFS1 (Supplemental Table S2c), ISD11-ISD11 (Supplemental Table S2d), FXN<sup>42-210</sup>-ISCU (Supplemental Table S2e), FXN<sup>42-210</sup>-NFS1 (Supplemental Table S2f), ISCU-NFS1 (Supplemental Table S2g) and FXN<sup>42-210</sup>-ISD11, ISCU-ISD11 and NFS1-ISD11 (Supplemental Table S2h) cross-linked peptides with FDR (False Discovery Rate) ≤5-≤60% identified as described in Experimental Procedures. Some of the cross-links are shown in Fig. 6-9, as indicated in the table (column labeled Figure). The number of times any given peptide was identified by MS/MS is also shown (column labeled # of peptides). The distance constraints and maximum allowable distance constraints between K-K, K-N-term, N-term-N-term, K-Y, K-S, K-T, N-term-S, N-term-T, and N-term-Y were calculated as described in Experimental Procedures and are shown in the table below. Distances were measured between all possible pairs of cross-linked residues within each of the cross-linked peptides in the simulated half structure of the complex, and are expressed as mean ± S.D. For each distance, we show the mean ± S.D. of 4-12 measurements depending on the geometric arrangement of the four proteins in the complex. The small standard deviations demonstrate that in the structure there are small differences in the orientation of the side chain of any given cross-linked residue among different protein subunits. Distances measured in the [FXN<sup>42-210</sup>]<sub>12</sub>•[ISCU]<sub>12</sub>•[NFS1]<sub>12</sub> structure that are equal to or lower than the distance constraints are highlighted in light gray; distances that are equal to or lower than the maximum allowable distance constraints are highlighted in dark gray, and distances greater than the maximum allowable distance constraints are highlighted in yellow. In Supplemental Table S2e, FXN<sup>42-210</sup>-ISCU *intra-dimer* distances are measured between FXN<sup>42-210</sup> and ISCU subunits of the same [FXN<sup>42-210</sup>]•[ISCU] heterodimer; FXN<sup>42-210</sup>-ISCU *intra-trimer* distances are measured between FXN<sup>42-210</sup> and ISCU subunits of the same [FXN<sup>42-210</sup>]<sub>3</sub>•[ISCU]<sub>3</sub> sub-complex, and FXN<sup>42-210</sup>-ISCU *inter-trimers* distances are measured between FXN<sup>42-210</sup> and ISCU subunits of two adjacent [FXN<sup>42-210</sup>]<sub>3</sub>•[ISCU]<sub>3</sub> sub-complexes. In Supplemental Table S2a, S2b, S2c or S2d, FXN<sup>42-210</sup>, ISCU, NFS1 and ISD11 *intra-monomer* distances are measured within individual ISCU, NFS1 and ISD11 subunits, FXN<sup>42-210</sup>-FXN<sup>42-210</sup> or ISCU-ISCU *intra-trimer* distances are measured between FXN<sup>42-210</sup> or ISCU subunits of the same [FXN<sup>42-210</sup>]<sub>3</sub>•[ISCU]<sub>3</sub> sub-complex, and FXN<sup>42-210</sup>-FXN<sup>42-210</sup> or ISCU-ISCU *inter-trimers* distances are measured between FXN<sup>42-210</sup> or ISCU subunits of two adjacent [FXN<sup>42-210</sup>]<sub>3</sub>•[ISCU]<sub>3</sub> sub-complexes. In Supplemental Table S2f and S2g, FXN<sup>42-210</sup>-NFS1 or ISCU-NFS1 *2-fold #1*, *2-fold #2* and *2-fold #3* distances are measured at the two-fold axis of the complex with three different modes of interaction of NFS1 with FXN<sup>42-210</sup> and/or ISCU subunits, *3-fold* distances are measured at the three-fold axis of the complex, *4-fold* distances at the four-fold axis of the complex, and *C-term* distances between FXN<sup>42-210</sup> or ISCU and the C-terminal region of NFS1. In Supplemental Table S2c, NFS1-NFS1 *monomer*, *dimer*, *trimer* and *tetramer* distances are measured, respectively, within the same NFS1 subunit or between two NFS1 subunits at the two-, three- and four-fold axis of the complex. Peptides beginning with the letter n are N-terminal peptides. NA, not applicable; NM, not measured.

|               | Distance Constraints (Å) | Maximum allowable distance constraints (Å)       |                                 |                                  |                                 |               |               |                |                 |                |               |
|---------------|--------------------------|--------------------------------------------------|---------------------------------|----------------------------------|---------------------------------|---------------|---------------|----------------|-----------------|----------------|---------------|
|               |                          | FXN <sup>42-210</sup> _<br>FXN <sup>42-210</sup> | FXN <sup>42-210</sup> _<br>ISCU | FXN <sup>42-210</sup> _<br>ISD11 | FXN <sup>42-210</sup> _<br>NFS1 | ISCU-<br>ISCU | ISCU-<br>NFS1 | ISCU-<br>ISD11 | ISD11-<br>ISD11 | ISD11-<br>NFS1 | NFS1-<br>NFS1 |
| K-K           | 24.0                     | 34.2                                             | 33.0                            | 32.6                             | 33.0                            | 31.8          | 31.8          | 31.4           | 31.0            | 31.4           | 31.8          |
| N-term-K      | 19.2                     | 29.4                                             | 28.2                            | 27.8                             | 28.2                            | 27.0          | 27.0          | 26.6           | 26.2            | 26.6           | 27.0          |
| N-term-N-term | 14.4                     | 24.6                                             | 23.4                            | 23.0                             | 23.4                            | 22.2          | 22.2          | 21.8           | 21.4            | 21.8           | 22.2          |
| Y-K           | 24.1                     | 34.3                                             | 33.1                            | 32.7                             | 33.1                            | 31.9          | 31.9          | 31.5           | 31.1            | 31.5           | 31.9          |
| S-K           | 20.1                     | 30.3                                             | 29.1                            | 28.7                             | 29.1                            | 27.9          | 27.9          | 27.5           | 27.1            | 27.5           | 27.9          |
| T-K           | 20.1                     | 30.3                                             | 29.1                            | 28.7                             | 29.1                            | 27.9          | 27.9          | 27.5           | 27.1            | 27.5           | 27.9          |
| N-term-S      | 15.3                     | 25.5                                             | 24.3                            | 23.9                             | 24.3                            | 23.1          | 23.1          | 22.7           | 22.3            | 22.7           | 23.1          |
| N-term-T      | 15.3                     | 25.5                                             | 24.3                            | 23.9                             | 24.3                            | 23.1          | 23.1          | 22.7           | 22.3            | 22.7           | 23.1          |
| N-term-Y      | 19.3                     | 29.5                                             | 28.3                            | 27.9                             | 28.3                            | 27.1          | 27.1          | 26.7           | 26.3            | 26.7           | 27.1          |

**Supplemental Table S3.** Contact Surfaces of [FXN<sup>42-210</sup>]<sub>6</sub>•[NFS1]<sub>2</sub>•[ISCU]<sub>6</sub> Sub-Complex as Determined by PISA Analysis

| Interface                              | Buried surface area (Å <sup>2</sup> ) | Residues involved in hydrogen bonding                                                                                                                                                                                                                                                                                                                                                                                                                                                                                                                                                                                                           | Residues involved in salt bridges                                                                                                                                                            | Residues involved in hydrophobic interactions |
|----------------------------------------|---------------------------------------|-------------------------------------------------------------------------------------------------------------------------------------------------------------------------------------------------------------------------------------------------------------------------------------------------------------------------------------------------------------------------------------------------------------------------------------------------------------------------------------------------------------------------------------------------------------------------------------------------------------------------------------------------|----------------------------------------------------------------------------------------------------------------------------------------------------------------------------------------------|-----------------------------------------------|
| FXN <sup>42-210</sup> -ISCU interfaces |                                       |                                                                                                                                                                                                                                                                                                                                                                                                                                                                                                                                                                                                                                                 |                                                                                                                                                                                              |                                               |
|                                        | 1646                                  |                                                                                                                                                                                                                                                                                                                                                                                                                                                                                                                                                                                                                                                 |                                                                                                                                                                                              |                                               |
|                                        |                                       | FXN <sup>42-210</sup> : <i>N-term</i> : Gln-64, Lys-69, <b>Gln-71</b> , Ser-72, Val-73, Tyr-74, Leu-78, Arg-79, <i>C-term</i> : Lys-197, Asp-199, Ser-201, Lys-208. <u>ISCU</u> : <i>N-term</i> , <i>β-sheet</i> : <b>Lys-54</b> , Thr-55, Lys-57, <b>Val-59</b> , <b>Thr-61</b> , <b>Leu-63</b> , <b>Val-64</b> , <b>Gly-65</b> , <b>Ala-66</b> , <b>Pro-67</b> , <b>Gly-70</b> , <b>Asp-71</b> , <b>Gln-76</b> , Asp-80, Glu-81, Lys-84; <i>C-term</i> , <i>α2</i> and <i>α3</i> : <b>Gly-111</b> , Lys-112, <b>Thr-113</b> , <b>Glu-116</b> , Thr-119, <b>Ile-120</b> , <b>Lys-121</b> , <b>Lys-127</b> , <b>Glu-128</b> , Cys-130, Lys-166. | FXN <sup>42-210</sup> -ISCU: Asp-178 or Glu-184*– <b>Lys-121</b> ; Asp-209*–Lys-112; Lys-208– <b>Glu-116</b> ; Lys-197– <b>Glu-128</b> ; Asp-199– <b>Lys-127</b> ; Arg-60*– <b>Asp-152</b> . | NA                                            |
|                                        | 682                                   |                                                                                                                                                                                                                                                                                                                                                                                                                                                                                                                                                                                                                                                 |                                                                                                                                                                                              |                                               |
|                                        |                                       | FXN <sup>42-210</sup> : <i>L3</i> : Gly-82, Thr-83, His-86*, <b>Leu-90</b> , Asp-91, Glu-92, Thr-93; <i>C-term</i> : Lys171, Ser-206. <u>ISCU</u> : <i>α4</i> and <i>α5</i> : <b>Asp-144</b> , <b>Lys-147</b> , <b>Asp-152</b> , <b>Lys-154</b> , Glu-163, Glu-165, Lys-166.                                                                                                                                                                                                                                                                                                                                                                    | FXN <sup>42-210</sup> -ISCU: Glu-92– <b>Lys-147</b> , His-86*–Glu-163, Asp-91–Lys-167*.                                                                                                      | NA                                            |

| Interface                                                             | Buried surface area (Å <sup>2</sup> ) | Residues involved in hydrogen bonding                                                                                                                                                                                                                                                                                                                                                                                              | Residues involved in salt bridges                                                                                                                                                                                       | Residues involved in hydrophobic interactions                                                                                                 |
|-----------------------------------------------------------------------|---------------------------------------|------------------------------------------------------------------------------------------------------------------------------------------------------------------------------------------------------------------------------------------------------------------------------------------------------------------------------------------------------------------------------------------------------------------------------------|-------------------------------------------------------------------------------------------------------------------------------------------------------------------------------------------------------------------------|-----------------------------------------------------------------------------------------------------------------------------------------------|
|                                                                       | 331                                   |                                                                                                                                                                                                                                                                                                                                                                                                                                    |                                                                                                                                                                                                                         |                                                                                                                                               |
|                                                                       |                                       | <u>FXN</u> <sup>42-210</sup> : <i>L6</i> and <i>L10</i> : Asp-139, <b>Ala-193</b> , Lys-195. <u>ISCU</u> : Cys-69, Asn-122, His-137.                                                                                                                                                                                                                                                                                               | NA                                                                                                                                                                                                                      | <u>FXN</u> <sup>42-210</sup> : <b>Leu-140, Pro-159, Ser-160, Ser-161</b> . <u>ISCU</u> : <b>Pro-133, Val-134, Leu-136, His137, Met-140</b> .  |
| ISCU-ISCU interfaces                                                  |                                       |                                                                                                                                                                                                                                                                                                                                                                                                                                    |                                                                                                                                                                                                                         |                                                                                                                                               |
|                                                                       | 412                                   |                                                                                                                                                                                                                                                                                                                                                                                                                                    |                                                                                                                                                                                                                         |                                                                                                                                               |
|                                                                       |                                       | <u>ISCU</u> <sup>a</sup> : <i>L3</i> : <b>Glu-81</b> , Lys-82, <b>Gly-83</b> ; <i>C-term</i> : Glu-165. <u>ISCU</u> <sup>b</sup> : <i>C-term</i> : Glu-158, Lys-160, Lys-161*.                                                                                                                                                                                                                                                     | <u>ISCU</u> <sup>a</sup> - <u>ISCU</u> <sup>b</sup> : <i>C-term</i> : Glu-158–Lys-57, Lys-161*–Glu-165, Lys-82–Glu-163.                                                                                                 | NA                                                                                                                                            |
|                                                                       | 298                                   |                                                                                                                                                                                                                                                                                                                                                                                                                                    |                                                                                                                                                                                                                         |                                                                                                                                               |
|                                                                       |                                       | <u>ISCU</u> <sup>1</sup> : <b>Cys-69</b> . <u>ISCU</u> <sup>2</sup> : Cys-130                                                                                                                                                                                                                                                                                                                                                      | NA                                                                                                                                                                                                                      | <u>ISCU</u> <sup>1</sup> : <b>Leu-131, Pro-132, Pro-133, Val-134</b> . <u>ISCU</u> <sup>2</sup> : <b>Leu-131, Pro-132, Pro-133, Val-134</b> . |
| <u>FXN</u> <sup>42-210</sup> - <u>FXN</u> <sup>42-210</sup> interface |                                       |                                                                                                                                                                                                                                                                                                                                                                                                                                    |                                                                                                                                                                                                                         |                                                                                                                                               |
|                                                                       | 1150                                  |                                                                                                                                                                                                                                                                                                                                                                                                                                    |                                                                                                                                                                                                                         |                                                                                                                                               |
|                                                                       |                                       | <u>FXN</u> <sup>42-210a</sup> : <i>N-term</i> : Asn-58, Leu-62, Gln-64, Lys-70; <i>L7</i> : <b>Asn-151</b> ; <i>L8</i> : <b>Ser-161</b> ; <i>L9</i> : Lys-164, <b>Arg-165</b> , Tyr-166, <b>Asp-167</b> , Gly-170, Tyr-176, His-177. <u>FXN</u> <sup>42-210b</sup> : <i>N-term</i> : Gln-71, <b>Ser-72</b> , Gly-82, Thr-83, <b>Leu-84</b> ; <i>L3</i> : Glu-92, Tyr-95; <i>α3</i> : Glu-96, Glu-100; <i>L7</i> : <b>Pro-150</b> , | <u>FXN</u> <sup>42-210a</sup> ( <i>N-term</i> )- <u>FXN</u> <sup>42-210b</sup> ( <i>L3</i> , <i>α3</i> and <i>L9</i> ): Asp-45*–Arg-79, Asp-91* or Glu-92–His-177, Glu-96 or Glu-100– <b>Arg-165</b> , Asp-47*–Lys-208. | NA                                                                                                                                            |

| Interface            | Buried surface area (Å <sup>2</sup> ) | Residues involved in hydrogen bonding                                                                                                                                                                                                                                              | Residues involved in salt bridges                                                                                                     | Residues involved in hydrophobic interactions                                                                                                                                                                                                                                                           |
|----------------------|---------------------------------------|------------------------------------------------------------------------------------------------------------------------------------------------------------------------------------------------------------------------------------------------------------------------------------|---------------------------------------------------------------------------------------------------------------------------------------|---------------------------------------------------------------------------------------------------------------------------------------------------------------------------------------------------------------------------------------------------------------------------------------------------------|
|                      | 304                                   |                                                                                                                                                                                                                                                                                    |                                                                                                                                       |                                                                                                                                                                                                                                                                                                         |
|                      |                                       | <u>FXN<sup>42-210 1</sup></u> : L6 : Lys-135, Asp-139, <b>Leu-140, Gly-141</b> .<br><u>FXN<sup>42-210 2</sup></u> : L3: Thr-93, Thr-94, α3: Arg-97, Glu-101, Tyr-205.                                                                                                              | <u>FXN<sup>42-210 1</sup></u> - <u>FXN<sup>42-210 2</sup></u> : Lys-135– <b>Glu-101</b> .                                             | NA                                                                                                                                                                                                                                                                                                      |
| NFS1-NFS1 interface  |                                       |                                                                                                                                                                                                                                                                                    |                                                                                                                                       |                                                                                                                                                                                                                                                                                                         |
|                      | 1600                                  |                                                                                                                                                                                                                                                                                    |                                                                                                                                       |                                                                                                                                                                                                                                                                                                         |
|                      |                                       | <u>NFS1<sup>a</sup></u> : <i>C-term α14</i> : Gln-444, <i>L18</i> : <b>Ser-377</b> . <u>NFS1<sup>b</sup></u> : <i>L19</i> : <b>Glu-387</b> ; <i>C-term</i> : <b>His-457</b> .                                                                                                      |                                                                                                                                       | <u>NFS1<sup>a</sup></u> : <b>Trp-440, Val-443, Ile-447, Leu-449, Ile-452, Trp-454, Gly-446</b> , Ser-451, Thr-455, <b>His-457</b> <u>NFS1<sup>b</sup></u> : <b>Leu-166, Leu-386, Val-391, Lys-157, Cys-158, Arg-164</b> , Ser-165, <b>Ser-376, Ser-377, Ser-383, Ala-384, Ser-385, Pro-388, Tyr-390</b> |
| NFS1-ISCU interfaces |                                       |                                                                                                                                                                                                                                                                                    |                                                                                                                                       |                                                                                                                                                                                                                                                                                                         |
|                      | 1285                                  |                                                                                                                                                                                                                                                                                    |                                                                                                                                       |                                                                                                                                                                                                                                                                                                         |
|                      |                                       | <u>NFS1</u> : <i>N-term</i> : <b>Thr-67, Asp-70, Arg-72</b> ; α9 : <b>Lys-371, Asp-372, Leu-375</b> , β10 : <b>Arg-407</b> ; α13 : <b>Glu-418</b> , Thr-422, Lys-425. <u>ISCU</u> : β3 : Lys-84, Asp-87, Arg-89, α1 : <b>Ser-103, Glu-107</b> , Lys-110, <b>Gly-111</b> , Lys-112. | <u>NFS1-ISCU</u> : <b>Asp-70</b> –Lys-84, <b>Asp-372</b> –Lys-110, <b>Arg-407</b> – <b>Glu-107, Glu-418</b> –Lys-110, Lys-425–Asp-87. | <u>NFS1</u> (α8 , α13 , L15 , L23 ) : <b>Leu-367, Leu-370, Val-373, Leu-375</b> , Tyr-421, <b>Leu-433, Leu-439, Trp-440, Val-443, Leu-449</b> , Ser-451. <u>ISCU</u> : β1–β3 : <b>Gly-50, Ser-51, Leu-63, Ala-66, Pro-67, Val-72, Val-86, Ala-88, Phe-90, Thr-92, Phe-93, Ile-99</b> .                  |



| Interface                                   | Buried surface area (Å <sup>2</sup> ) | Residues involved in hydrogen bonding                                                                                                                                                                                                                                                                                                                                                                                     | Residues involved in salt bridges                                                               | Residues involved in hydrophobic interactions |
|---------------------------------------------|---------------------------------------|---------------------------------------------------------------------------------------------------------------------------------------------------------------------------------------------------------------------------------------------------------------------------------------------------------------------------------------------------------------------------------------------------------------------------|-------------------------------------------------------------------------------------------------|-----------------------------------------------|
|                                             | 315                                   |                                                                                                                                                                                                                                                                                                                                                                                                                           |                                                                                                 |                                               |
|                                             |                                       | <u>NFS1</u> : L18, L19: <b>Cys-381, Thr-382, Ser-383, Leu-386, Glu-387</b> . <u>ISCU</u> : L2: <b>Ala-68, Cys-69</b> ; L4: <b>Lys-91, Thr-92</b> ; L7: <b>His-137</b> .                                                                                                                                                                                                                                                   | <u>NFS1-ISCU</u> : <b>Glu-387–Lys-91</b> .                                                      | NA                                            |
| <b>NFS1-FXN<sup>42-210</sup> interfaces</b> |                                       |                                                                                                                                                                                                                                                                                                                                                                                                                           |                                                                                                 |                                               |
|                                             | 1895                                  |                                                                                                                                                                                                                                                                                                                                                                                                                           |                                                                                                 |                                               |
|                                             |                                       | <u>NFS1</u> : <i>N-term</i> : <b>Thr-67, Leu-69, Asp-70, Arg-72, Asp-75, Tyr-80</b> ; L13: <b>Lys-263, Gly-264</b> ; L14: <b>Gln-282, Arg-292, Thr-295, Pro-299, Leu-300, Val-301</b> ; L18: <b>Cys-381</b> ; L23: <b>Asp-448</b> . <u>FXN<sup>42-210</sup></u> : L3: <b>Arg-79, Ser-89, Leu-90</b> ; $\alpha 3$ : <b>Glu-96, Glu-108, Glu-111, Asp-112, Asp-115</b> , L4: <b>Lys-116</b> , $\alpha 4$ : <b>Asp-199</b> . | <u>NFS1 and FXN<sup>42-210</sup></u> : <b>Asp-70–Arg-79, Lys-263–Asp-199, Arg-292–Glu-111</b> . | NA                                            |
|                                             | 926                                   |                                                                                                                                                                                                                                                                                                                                                                                                                           |                                                                                                 |                                               |
|                                             |                                       | <u>NFS1</u> : ( <i>N-term, L12, L13, <math>\alpha 8, \alpha 13</math></i> ): <b>Arg-72, Met-77, Lys-239, Tyr-260, Glu-309, Asp-318, Glu-416, Glu-417</b> . <u>FXN<sup>42-210</sup></u> : <i>N-term</i> : <b>Arg-43*, Thr-44*, Ile-46*, Asp-47*, Thr-49*, Cys-50*, Arg-54*, Asn-63*</b> .                                                                                                                                  | <u>NFS1-FXN<sup>42-210</sup></u> : <b>Asp-75–Arg-54*, Glu-416 or Glu-417–Arg-43*</b> .          |                                               |

A coordinate file of the active center of the four-protein complex, [FXN<sup>42-210</sup>]<sub>6</sub>•[NFS1]<sub>2</sub>•[ISCU]<sub>6</sub>, was extracted from the simulated half-structure of the complex, and was uploaded into the PISA program ([www.ebi.ac.uk/msd-srv/prot\\_int/cgi-bin/piserver](http://www.ebi.ac.uk/msd-srv/prot_int/cgi-bin/piserver)). The PISA Interfaces algorithm was used to identify protein-protein interfaces, their buried surface areas (BSA), and amino acid residues involved in hydrogen bonding, salt bridges or hydrophobic interactions between the two contact surfaces. Residues denoted by an asterisk are not conserved, those in bold are conserved in eukaryotes, and all others are conserved in mammals.

**Supplemental Table S4.** Validation of the protein models generated for the study

| Validation Tool    | Protein Models        |           |          |           |                                                            |
|--------------------|-----------------------|-----------|----------|-----------|------------------------------------------------------------|
|                    | FXN <sup>42-210</sup> | ISCU      | ISD11    | NFS1      | [FXN <sup>42-210</sup> ] <sub>3</sub> •[ISCU] <sub>3</sub> |
| Ramachandran plot  |                       |           |          |           |                                                            |
| Favored region     | 82.0 %                | 84.7 %    | 79.8 %   | 90.3 %    | 87.0 %                                                     |
| Allowed region     | 9.0 %                 | 9.9 %     | 13.5 %   | 8.0 %     | 9.0 %                                                      |
| Disallowed region  | 9.0 %                 | 5.3 %     | 6.7 %    | 1.7 %     | 4.0 %                                                      |
| ProQ               |                       |           |          |           |                                                            |
| Predicted LG score | 1.8                   | 4.2       | 0.39     | 6.16      | 2.5                                                        |
| Predicted MaxSub   | 0.26                  | 0.15      | 0.085    | 0.24      | 0.2                                                        |
| Verify 3D          | 80.0 %                | 80.0 %    | 65 %     | 80.0 %    | 63.2 %                                                     |
| I-TASSER           |                       |           |          |           |                                                            |
| C-score            | -1.3                  | 0.9       | -2.7     | 1.48      | ---                                                        |
| TM-score           | 0.56±0.15             | 0.84±0.08 | 0.4±0.14 | 0.92±0.06 | ---                                                        |

Ramachandran plot identifies whether any given residue is in the favored, allowed or disallowed region, defined using ProCheck parameters (2). Verify 3D determines the compatibility of an atomic model (3D) with its own amino acid sequence (1D) by assigning a structural class based on its location and environment ( $\alpha$  helix,  $\beta$  strand, loop, polar, nonpolar, etc.) and comparing the results to validated structures (3). C-score is a confidence score for estimating the quality of models generated using the I-TASSER web resource. A C-score is typically in the range of [-5 to 2], where a C-score of higher value signifies a model with a higher confidence and vice-versa (4). TM-score is a scale for measuring the structural similarity between two structures. A TM-score >0.5 indicates a model of correct topology and a TM-score <0.17 means a random similarity (4).

- Morris, A.L., MacArthur, M.W., Hutchinson, E.G. and Thornton, J.M. (1992). Stereochemical quality of protein structure coordinates. *Proteins*, **12**, 345-364.
- Lüthy, R., Bowie, J.U., Eisenberg, D. (1992) Assessment of protein models with three-dimensional profiles. *Nature*, **5**, 83-5.
- Yang, J., Yan, R., Roy, A., Xu, D., Poisson, J., and Zhang, Y. (2015). The I-TASSER Suite: protein structure and function prediction *Nat. Methods* **12**, 7-8.
